# Supplementary material for: CircAFF1 Is a Circular RNA with a Role in Alveolar Rhabdomyosarcoma Cell Migration
Source: MDPI journal article supplement (doi:10.3390/biomedicines11071893), 2023-07-04
Supplement: s1 [file s1]

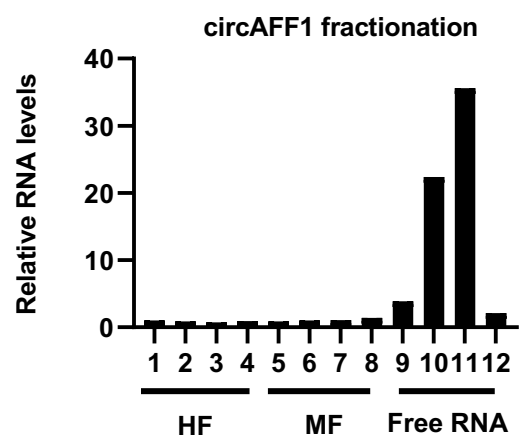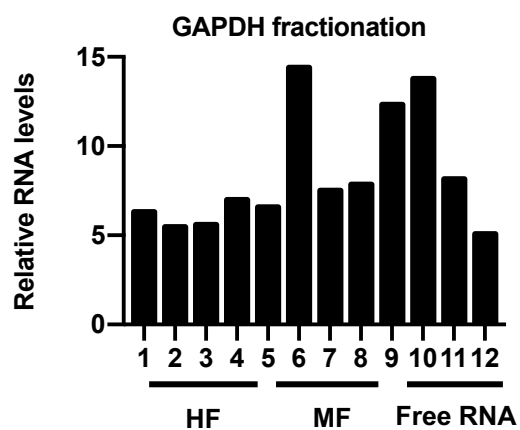

**Figure S1** Relative levels of RNA detected by qRT-PCR of circAFF1 and GAPDH mRNA in RH4 After sucrose polysome fractionation.

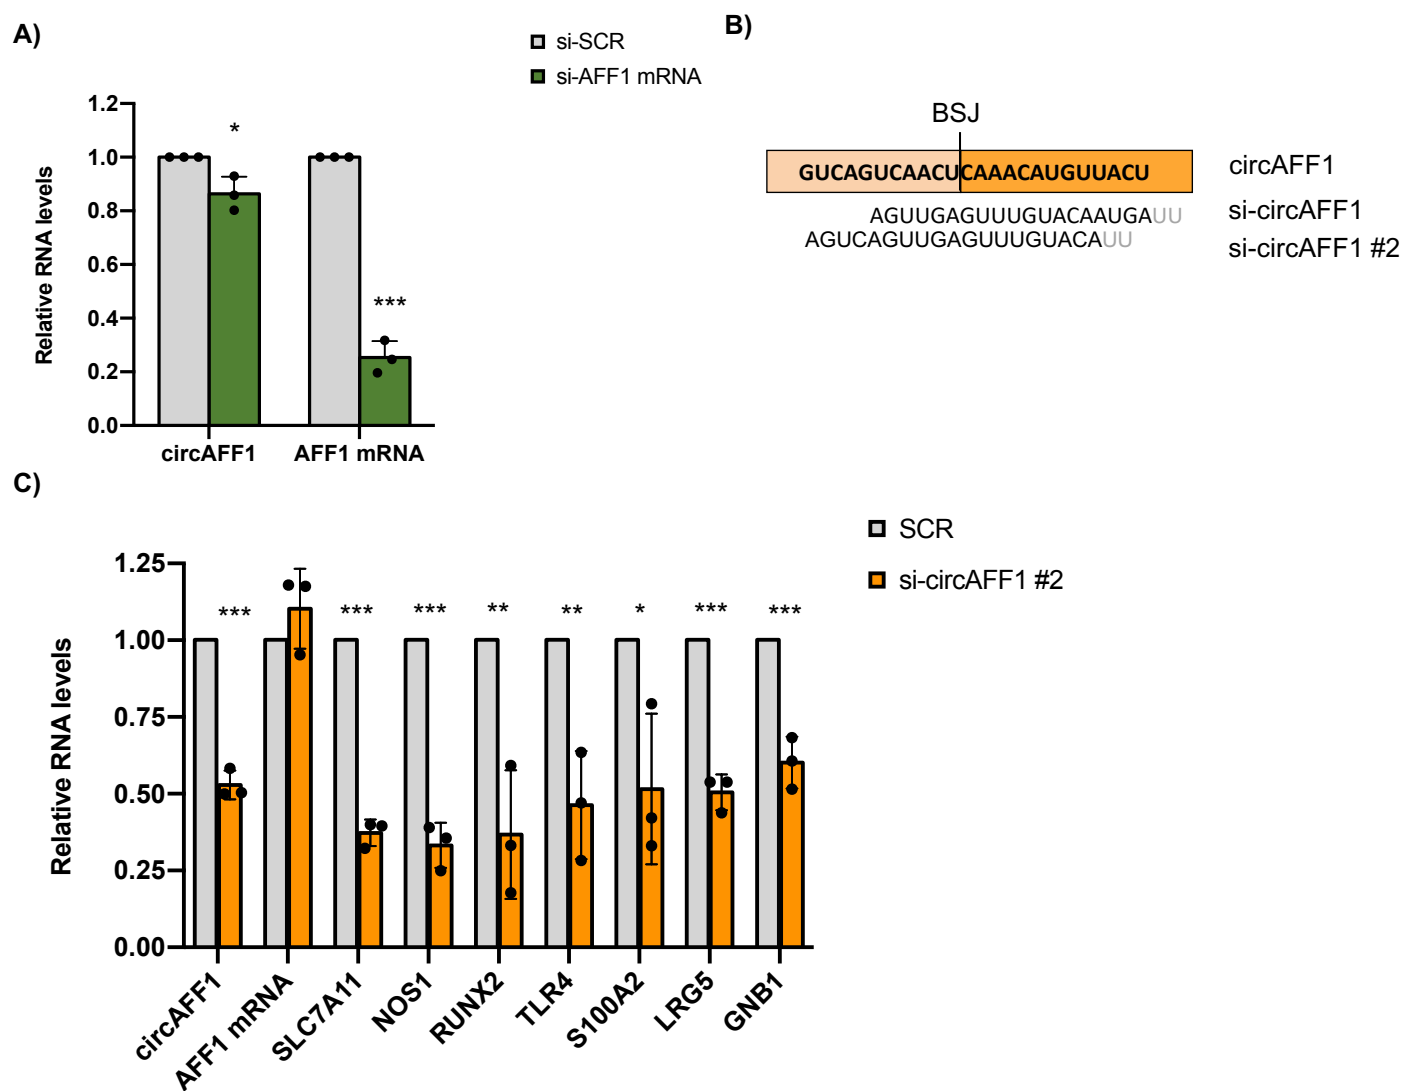

**Figure S2** (A) Relative levels of RNA normalised against GAPDH transcript detected by qRT-PCR of circAFF1 and AFF1 mRNA in RH4 cells treated with si-SCR or si-AFF1 mRNA. Data are represented as the mean of fold changes  $\pm$  standard deviation of at least 3 biological replicates. (B) Cartoon depiction the sequence the design strategy for si-circAFF1 #2 (C) Relative levels of RNA normalised against GAPDH transcript detected by qRT-PCR of circAFF1 and AFF1 mRNA in RH4 cells treated with si-SCR or si-circAFF1 #2. Data are represented as the mean of fold changes  $\pm$  standard deviation of at least 3 biological replicates. Individual datapoints represented as black dots. Where statistical analysis was performed, the ratio of each sample vs. its experimental control was tested by a two-tailed unpaired Student's t-test. \*: p-value < 0.05, \*\*: p-value < 0.01, \*\*\*: p-value < 0.001.

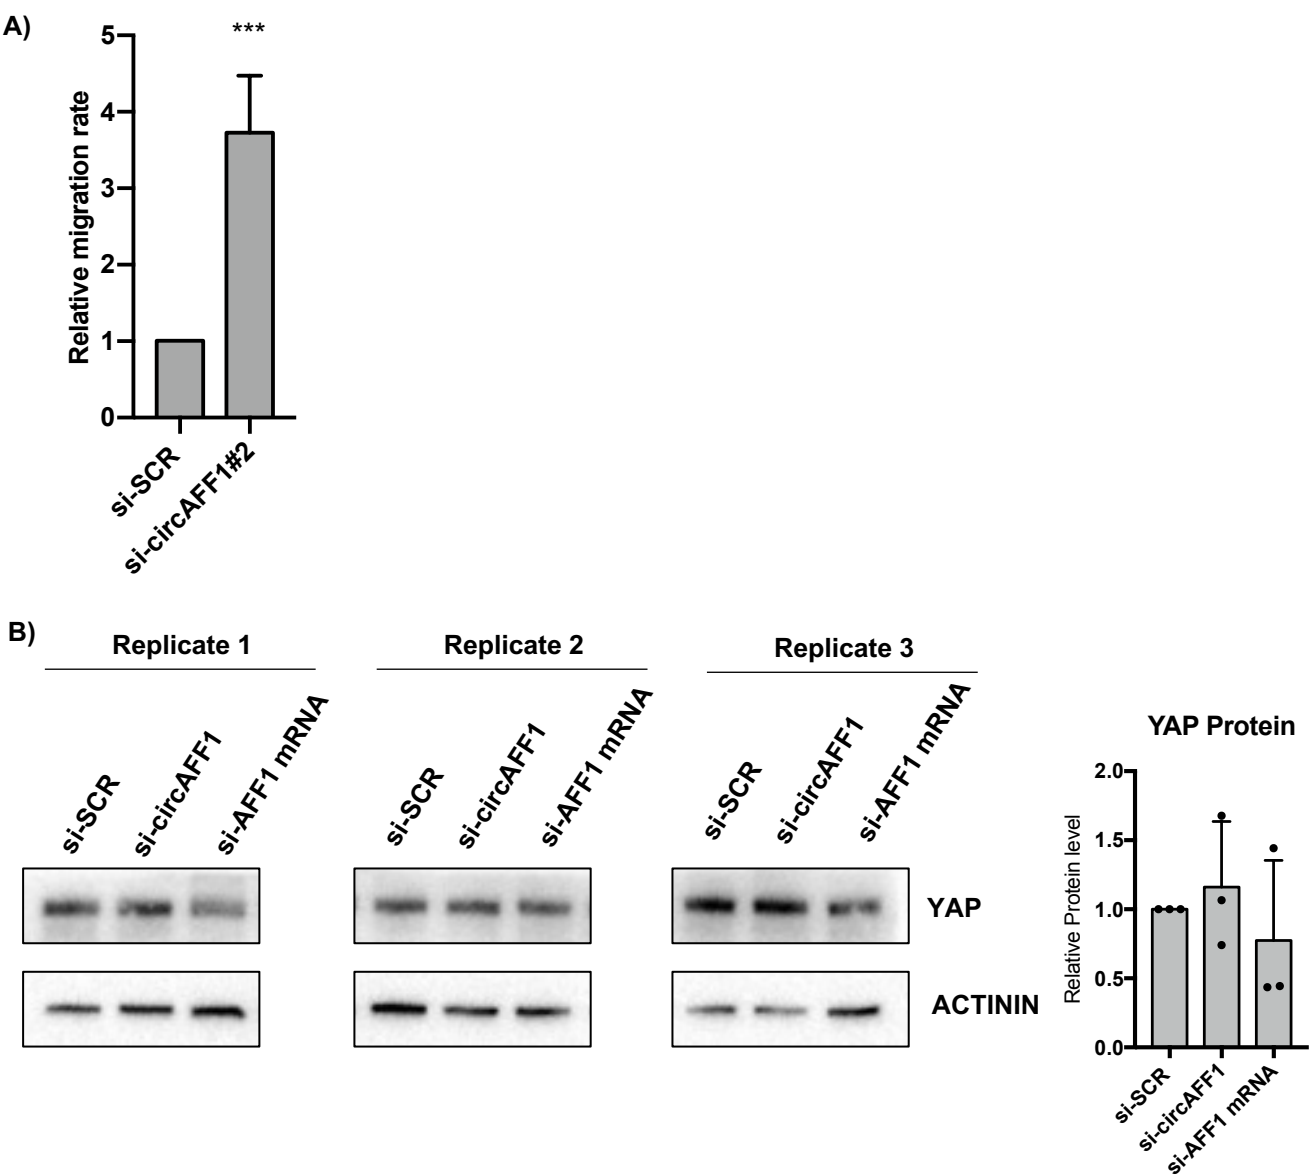

**Figure S3 (A)** Right panel: Relative migration rate of RH4 cells upon si-SCR or si-circAFF1 #2. Data are depicted as the average of fold changes  $\pm$  SD of 3 biological replicates. **(B)** Protein levels of YAP1 and Actinin in RH4 cells after si-SCR , si-circAFF1 or ci-AFF1 mRNA treatment. Right panel: Relative to actinin quantification of three independent experiments. Data are represented as the mean of fold changes  $\pm$  standard deviation of biological replicates. Individual datapoints represented as black dots. Where statistical analysis was performed, the ratio of each sample vs. its experimental control was tested by a two-tailed unpaired Student's t-test. \*\*\*: p-value < 0.001.
