# Supplementary material for: CircAFF1 Is a Circular RNA with a Role in Alveolar Rhabdomyosarcoma Cell Migration
Source: Biomedicines. 2023 Jul 4;11(7):1893. doi: 10.3390/biomedicines11071893 (PMC10376778; doi:10.3390/biomedicines11071893)
Supplement: Supplementary file 1 [file biomedicines-11-01893-s001.zip › Table S1.xlsx]

## Sheet: Hoja1
Gene ID	A	B	logFC	logCPM	F	PValue	FDR	Gene name	Gene type
ENSG00000204899	34.5167	9.43646	-1.87063	5.952	1133.9	6.04428e-14	8.35441e-10	MZT1	protein_coding
ENSG00000126549	28.5076	11.3945	-1.32298	5.96817	488.144	1.26189e-11	8.72092e-08	STATH	protein_coding
ENSG00000196937	27.9823	12.1554	-1.20269	6.38469	393.606	4.86681e-11	2.2423e-07	FAM3C	protein_coding
ENSG00000171587	1.41225	0.288984	-2.28558	3.55185	351.892	9.79269e-11	3.38387e-07	DSCAM	protein_coding
ENSG00000033867	7.45077	3.80792	-0.968175	6.14908	329.174	1.48348e-10	3.95801e-07	SLC4A7	protein_coding
ENSG00000145284	18.752	8.49393	-1.14269	5.88223	321.486	1.71813e-10	3.95801e-07	SCD5	protein_coding
ENSG00000076706	36.4362	17.2517	-1.07846	7.95564	311.114	2.106e-10	4.15845e-07	MCAM	protein_coding
ENSG00000196549	4.8535	2.03178	-1.25567	5.32121	277.313	4.29186e-10	7.41526e-07	MME	protein_coding
ENSG00000024526	17.6074	10.089	-0.803442	6.48239	267.166	5.40188e-10	7.8028e-07	DEPDC1	protein_coding
ENSG00000134215	9.21395	4.06596	-1.17969	5.54213	265.263	5.6452e-10	7.8028e-07	VAV3	protein_coding
ENSG00000065559	6.70705	3.28984	-1.02708	5.12326	254.402	7.30305e-10	8.77754e-07	MAP2K4	protein_coding
ENSG00000141429	14.4523	7.23931	-0.99765	6.01538	249.568	8.21742e-10	8.77754e-07	GALNT1	protein_coding
ENSG00000086289	28.0923	12.9902	-1.11254	6.18321	249.381	8.25554e-10	8.77754e-07	EPDR1	protein_coding
ENSG00000105173	92.7876	60.4243	-0.61872	7.64701	233.287	1.24327e-09	1.22746e-06	CCNE1	protein_coding
ENSG00000136231	9.07474	4.81622	-0.913531	6.20559	229.979	1.35693e-09	1.25037e-06	IGF2BP3	protein_coding
ENSG00000169851	29.5862	18.8969	-0.646815	8.47375	221.39	1.71275e-09	1.38124e-06	PCDH7	protein_coding
ENSG00000140090	0.658631	0.191291	-1.78217	3.27717	220.379	1.76135e-09	1.38124e-06	SLC24A4	protein_coding
ENSG00000151233	8.25875	4.29865	-0.94162	5.93647	218.523	1.85472e-09	1.38124e-06	GXYLT1	protein_coding
ENSG00000152492	8.90914	5.47782	-0.701544	6.17348	217.687	1.89868e-09	1.38124e-06	CCDC50	protein_coding
ENSG00000037474	32.0193	18.964	-0.755517	7.23496	213.901	2.11329e-09	1.40682e-06	NSUN2	protein_coding
ENSG00000124762	10.8309	21.7465	1.00484	5.62037	213.503	2.13741e-09	1.40682e-06	CDKN1A	protein_coding
ENSG00000110696	22.8497	15.0828	-0.599233	7.82519	208.393	2.4776e-09	1.51328e-06	C11orf58	protein_coding
ENSG00000165806	15.7446	9.01874	-0.803616	5.80688	207.839	2.51812e-09	1.51328e-06	CASP7	protein_coding
ENSG00000105849	22.2549	12.6628	-0.813347	6.29402	206.186	2.64359e-09	1.52249e-06	TWISTNB	protein_coding
ENSG00000145740	15.2849	9.18475	-0.73478	6.21914	201.764	3.0164e-09	1.57287e-06	SLC30A5	protein_coding
ENSG00000157224	9.99714	5.72404	-0.804445	5.99505	201.324	3.05672e-09	1.57287e-06	CLDN12	protein_coding
ENSG00000149948	15.129	8.47337	-0.836161	7.75059	201.154	3.07246e-09	1.57287e-06	HMGA2	protein_coding
ENSG00000204272	11.4382	5.04209	-1.18087	4.75909	197.845	3.39832e-09	1.67756e-06	NBDY	protein_coding
ENSG00000185482	106.642	155.11	0.540437	7.87984	195.55	3.64793e-09	1.69132e-06	STAC3	protein_coding
ENSG00000100916	7.52399	3.83457	-0.972299	4.69697	194.307	3.79182e-09	1.69132e-06	BRMS1L	protein_coding
ENSG00000072041	2.04662	0.754284	-1.43944	3.66531	193.651	3.87053e-09	1.69132e-06	SLC6A15	protein_coding
ENSG00000108840	17.9738	10.4419	-0.78363	6.58821	193.281	3.91565e-09	1.69132e-06	HDAC5	protein_coding
ENSG00000175928	18.8359	28.4846	0.596741	7.0219	186.811	4.81308e-09	2.01595e-06	LRRN1	protein_coding
ENSG00000134291	26.2126	42.5789	0.699979	6.63483	183.154	5.42479e-09	2.20534e-06	TMEM106C	protein_coding
ENSG00000184254	19.4367	11.9102	-0.706563	6.92421	180.316	5.9617e-09	2.35436e-06	ALDH1A3	protein_coding
ENSG00000163638	4.5632	2.5488	-0.839717	5.52342	178.205	6.40113e-09	2.40146e-06	ADAMTS9	protein_coding
ENSG00000108946	95.4708	62.2135	-0.617809	9.2782	177.864	6.47556e-09	2.40146e-06	PRKAR1A	protein_coding
ENSG00000164828	22.4035	13.9307	-0.685591	8.07151	177.295	6.60219e-09	2.40146e-06	SUN1	protein_coding
ENSG00000078369	21.7541	14.2985	-0.605505	6.95259	172.944	7.66931e-09	2.65122e-06	GNB1	protein_coding
ENSG00000056586	13.6824	8.88462	-0.622748	7.23757	171.468	8.07585e-09	2.65122e-06	RC3H2	protein_coding
ENSG00000169764	14.3416	8.73896	-0.714547	6.39184	170.93	8.22992e-09	2.65122e-06	UGP2	protein_coding
ENSG00000163536	22.0796	11.6703	-0.919575	5.5358	170.397	8.38611e-09	2.65122e-06	SERPINI1	protein_coding
ENSG00000114200	112.92	69.3258	-0.703853	8.5296	170.039	8.49292e-09	2.65122e-06	BCHE	protein_coding
ENSG00000164109	47.2494	30.3187	-0.640067	7.98954	169.419	8.68172e-09	2.65122e-06	MAD2L1	protein_coding
ENSG00000133101	12.7747	6.11841	-1.06139	4.39583	169.102	8.78019e-09	2.65122e-06	CCNA1	protein_coding
ENSG00000105855	7.36697	3.59724	-1.03361	6.93811	168.862	8.85562e-09	2.65122e-06	ITGB8	protein_coding
ENSG00000133026	16.1868	10.6239	-0.607546	7.08902	167.812	9.19404e-09	2.65122e-06	MYH10	protein_coding
ENSG00000089250	17.4864	8.7141	-1.00462	7.63623	167.215	9.39335e-09	2.65122e-06	NOS1	protein_coding
ENSG00000165966	2.88299	0.936622	-1.62063	3.30646	167.199	9.39877e-09	2.65122e-06	PDZRN4	protein_coding
ENSG00000139318	44.1628	28.0968	-0.652466	7.85138	164.72	1.02814e-08	2.84219e-06	DUSP6	protein_coding
ENSG00000107789	5.39433	2.27164	-1.24717	3.83904	163.042	1.09333e-08	2.96313e-06	MINPP1	protein_coding
ENSG00000002549	17.9455	10.7753	-0.735482	5.83036	159.888	1.22926e-08	3.26747e-06	LAP3	protein_coding
ENSG00000196139	13.4961	7.75967	-0.797918	5.58059	159.061	1.26807e-08	3.30703e-06	AKR1C3	protein_coding
ENSG00000128923	14.89	10.0715	-0.563943	7.10382	158.012	1.31935e-08	3.37704e-06	MINDY2	protein_coding
ENSG00000157514	16.9367	10.748	-0.655858	6.33226	154.376	1.51654e-08	3.75949e-06	TSC22D3	protein_coding
ENSG00000131711	15.7096	10.6055	-0.566794	7.53668	154.264	1.52316e-08	3.75949e-06	MAP1B	protein_coding
ENSG00000101412	40.8886	64.0638	0.647469	7.05166	152.135	1.65501e-08	4.01325e-06	E2F1	protein_coding
ENSG00000104368	16.9028	10.4608	-0.692271	6.81812	150.507	1.76486e-08	4.16455e-06	PLAT	protein_coding
ENSG00000159251	327.103	547.998	0.744467	9.54403	150.191	1.78709e-08	4.16455e-06	ACTC1	protein_coding
ENSG00000115593	2.72486	6.36184	1.22302	3.82574	149.902	1.80779e-08	4.16455e-06	SMYD1	protein_coding
ENSG00000069869	5.33551	3.23967	-0.719828	5.5343	147.886	1.95983e-08	4.44078e-06	NEDD4	protein_coding
ENSG00000106772	4.83029	3.13031	-0.625655	6.01963	146.386	2.08258e-08	4.61819e-06	PRUNE2	protein_coding
ENSG00000164176	0.842726	2.04929	1.2812	2.76927	146.123	2.10495e-08	4.61819e-06	EDIL3	protein_coding
ENSG00000147164	19.4578	30.6363	0.654768	6.21087	142.133	2.48186e-08	5.33738e-06	SNX12	protein_coding
ENSG00000166900	4.39405	2.34889	-0.903098	4.62209	141.812	2.5154e-08	5.33738e-06	STX3	protein_coding
ENSG00000101182	353.232	255.256	-0.468661	9.23438	141.118	2.58975e-08	5.33738e-06	PSMA7	protein_coding
ENSG00000116106	1.28752	2.82541	1.13363	3.87968	140.983	2.60454e-08	5.33738e-06	EPHA4	protein_coding
ENSG00000179314	48.276	34.0819	-0.502357	8.00521	140.79	2.62583e-08	5.33738e-06	WSCD1	protein_coding
ENSG00000119787	13.3949	8.06233	-0.732316	6.17793	139.67	2.75333e-08	5.51544e-06	ATL2	protein_coding
ENSG00000159173	20.3022	31.6567	0.640514	8.12204	137.507	3.0204e-08	5.96143e-06	TNNI1	protein_coding
ENSG00000102802	26.9651	14.9322	-0.852246	6.09393	137.188	3.06223e-08	5.96143e-06	MEDAG	protein_coding
ENSG00000171365	39.1543	24.9711	-0.648789	8.55681	135.465	3.30037e-08	6.19521e-06	CLCN5	protein_coding
ENSG00000095587	3.73095	1.85554	-1.00672	4.73484	135.032	3.36343e-08	6.19521e-06	TLL2	protein_coding
ENSG00000009335	14.796	9.69329	-0.609899	7.02937	135.014	3.36612e-08	6.19521e-06	UBE3C	protein_coding
ENSG00000124813	4.85763	2.33119	-1.0584	5.34754	134.812	3.39603e-08	6.19521e-06	RUNX2	protein_coding
ENSG00000213281	71.7969	49.7647	-0.528711	8.09379	134.743	3.40642e-08	6.19521e-06	NRAS	protein_coding
ENSG00000131724	19.5893	12.591	-0.63741	6.43691	132.582	3.74822e-08	6.7283e-06	IL13RA1	protein_coding
ENSG00000106733	4.62544	1.92156	-1.26598	4.03091	131.637	3.90993e-08	6.92859e-06	NMRK1	protein_coding
ENSG00000110042	13.6945	8.7564	-0.644897	6.36586	131.344	3.9618e-08	6.93165e-06	DTX4	protein_coding
ENSG00000162377	28.7242	19.6188	-0.549904	6.80626	130.968	4.02929e-08	6.96161e-06	COA7	protein_coding
ENSG00000179761	18.0028	9.23819	-0.962527	6.00891	130.25	4.16231e-08	7.10264e-06	PIPOX	protein_coding
ENSG00000101198	17.2559	10.1126	-0.770775	5.20244	129.854	4.23782e-08	7.11536e-06	NKAIN4	protein_coding
ENSG00000171100	2.59903	0.879637	-1.5621	3.272	129.673	4.27271e-08	7.11536e-06	MTM1	protein_coding
ENSG00000157483	21.7436	14.1526	-0.61942	7.40697	128.58	4.4915e-08	7.39065e-06	MYO1E	protein_coding
ENSG00000114999	12.6324	8.53086	-0.566225	7.42845	127.818	4.65153e-08	7.56393e-06	TTL	protein_coding
ENSG00000175305	12.2788	19.5881	0.673974	6.17964	126.455	4.9548e-08	7.9634e-06	CCNE2	protein_coding
ENSG00000176853	14.0538	9.45358	-0.571951	6.49087	125.278	5.23506e-08	8.23017e-06	FAM91A1	protein_coding
ENSG00000142089	149.642	101.902	-0.554285	7.33495	125.258	5.23987e-08	8.23017e-06	IFITM3	protein_coding
ENSG00000054983	27.9282	19.9814	-0.483005	7.39752	124.316	5.47769e-08	8.50704e-06	GALC	protein_coding
ENSG00000135424	19.5538	11.7398	-0.736274	6.8709	123.664	5.64958e-08	8.6765e-06	ITGA7	protein_coding
ENSG00000128422	14.6064	8.59099	-0.765651	5.56709	123.335	5.73866e-08	8.71646e-06	KRT17	protein_coding
ENSG00000167202	4.4503	6.60331	0.569502	5.70882	122.836	5.87698e-08	8.73796e-06	TBC1D2B	protein_coding
ENSG00000164466	31.9556	22.5103	-0.505385	7.88426	122.828	5.87925e-08	8.73796e-06	SFXN1	protein_coding
ENSG00000163328	3.95637	1.7956	-1.13832	4.52093	122.592	5.94587e-08	8.74296e-06	GPR155	protein_coding
ENSG00000151151	1.55382	0.557864	-1.47708	3.20407	122.346	6.01642e-08	8.75357e-06	IPMK	protein_coding
ENSG00000110092	57.6671	35.6652	-0.693172	8.11615	118.848	7.13164e-08	1.02681e-05	CCND1	protein_coding
ENSG00000242950	36.5557	17.4472	-1.06684	7.97755	118.572	7.22955e-08	1.03017e-05	ERVW-1	protein_coding
ENSG00000136381	14.006	9.55294	-0.551768	7.22557	116.751	7.91427e-08	1.11624e-05	IREB2	protein_coding
ENSG00000149679	9.40098	15.2351	0.69667	5.21017	116.155	8.15486e-08	1.12815e-05	CABLES2	protein_coding
ENSG00000082153	54.096	39.7463	-0.444669	8.52618	116.137	8.16201e-08	1.12815e-05	BZW1	protein_coding
ENSG00000116237	32.7582	24.0314	-0.446875	7.18513	115.182	8.56518e-08	1.17216e-05	ICMT	protein_coding
ENSG00000147533	52.3538	35.62	-0.555386	6.94485	114.25	8.98119e-08	1.2094e-05	GOLGA7	protein_coding
ENSG00000100697	40.1423	24.0159	-0.740985	8.73961	114.182	9.01233e-08	1.2094e-05	DICER1	protein_coding
ENSG00000163389	4.57071	2.69137	-0.763472	4.85368	112.073	1.00467e-07	1.31514e-05	POGLUT1	protein_coding
ENSG00000116329	11.7465	8.07466	-0.540548	6.62407	112.016	1.00763e-07	1.31514e-05	OPRD1	protein_coding
ENSG00000159792	7.53289	12.8784	0.773827	5.00189	111.865	1.01558e-07	1.31514e-05	PSKH1	protein_coding
ENSG00000154330	25.232	17.0178	-0.568233	7.24251	111.818	1.01809e-07	1.31514e-05	PGM5	protein_coding
ENSG00000068903	15.8652	22.5981	0.510376	6.60923	111.366	1.04235e-07	1.33401e-05	SIRT2	protein_coding
ENSG00000088305	11.5762	17.115	0.563747	5.90468	110.788	1.0744e-07	1.36241e-05	DNMT3B	protein_coding
ENSG00000157654	15.2404	10.8626	-0.48844	8.06203	109.778	1.13317e-07	1.41305e-05	PALM2AKAP2	protein_coding
ENSG00000176641	5.18726	3.09323	-0.745392	5.74346	109.751	1.13477e-07	1.41305e-05	RNF152	protein_coding
ENSG00000162878	9.03273	13.5974	0.590161	5.1662	108.475	1.21455e-07	1.49156e-05	PKDCC	protein_coding
ENSG00000135414	6.87829	10.1608	0.562957	6.01918	108.4	1.2194e-07	1.49156e-05	GDF11	protein_coding
ENSG00000196502	5.27924	3.28476	-0.684425	5.44908	106.917	1.32083e-07	1.60145e-05	SULT1A1	protein_coding
ENSG00000102531	10.8611	6.97951	-0.637605	6.37274	106.639	1.34089e-07	1.61163e-05	FNDC3A	protein_coding
ENSG00000063015	1.95508	0.578468	-1.75293	3.1597	106.08	1.38236e-07	1.62917e-05	SEZ6	protein_coding
ENSG00000163531	2.89744	1.52789	-0.922311	5.93791	106.049	1.38468e-07	1.62917e-05	NFASC	protein_coding
ENSG00000105971	1.68808	0.487189	-1.79404	3.15323	105.968	1.39085e-07	1.62917e-05	CAV2	protein_coding
ENSG00000196754	6.37034	2.66195	-1.25857	3.64076	105.519	1.42541e-07	1.65564e-05	S100A2	protein_coding
ENSG00000174403	8.44349	15.4851	0.874117	5.08202	104.372	1.51847e-07	1.74903e-05	MIR1-1HG-AS1	lncRNA
ENSG00000104660	15.1096	10.4319	-0.534187	6.34573	103.413	1.6017e-07	1.82965e-05	LEPROTL1	protein_coding
ENSG00000110917	61.6641	43.9764	-0.487629	8.45849	102.782	1.65927e-07	1.87987e-05	MLEC	protein_coding
ENSG00000162735	20.0786	12.3133	-0.705013	6.24684	101.732	1.76056e-07	1.97841e-05	PEX19	protein_coding
ENSG00000213585	85.8832	65.109	-0.399532	8.02585	100.419	1.89744e-07	2.11503e-05	VDAC1	protein_coding
ENSG00000116774	6.91239	3.25281	-1.08868	5.13193	99.113	2.04588e-07	2.26226e-05	OLFML3	protein_coding
ENSG00000091409	30.2664	21.3966	-0.500523	7.84698	98.7702	2.08704e-07	2.28946e-05	ITGA6	protein_coding
ENSG00000115310	19.3001	26.05	0.432553	7.21306	98.2143	2.15585e-07	2.32829e-05	RTN4	protein_coding
ENSG00000257923	6.07373	8.65526	0.510901	6.80239	98.212	2.15613e-07	2.32829e-05	CUX1	protein_coding
ENSG00000188549	3.6825	1.9661	-0.905448	4.81308	97.8427	2.20329e-07	2.36019e-05	CCDC9B	protein_coding
ENSG00000106799	35.8071	26.7104	-0.422756	7.92588	97.7154	2.21983e-07	2.36019e-05	TGFBR1	protein_coding
ENSG00000180209	5.5422	11.5151	1.05332	4.35997	96.9128	2.32743e-07	2.4557e-05	MYLPF	protein_coding
ENSG00000135956	8.32104	12.0233	0.53126	5.87134	96.6857	2.35896e-07	2.47012e-05	TMEM127	protein_coding
ENSG00000197712	12.6092	8.76436	-0.524484	5.89201	96.4451	2.39291e-07	2.48263e-05	FAM114A1	protein_coding
ENSG00000128791	11.1053	16.3828	0.561081	5.79011	96.3476	2.40683e-07	2.48263e-05	TWSG1	protein_coding
ENSG00000091137	3.4081	1.71318	-0.991043	3.97443	95.4851	2.53409e-07	2.58677e-05	SLC26A4	protein_coding
ENSG00000055070	48.3868	66.1893	0.452079	7.98108	95.4121	2.54522e-07	2.58677e-05	SZRD1	protein_coding
ENSG00000275342	0.663829	1.70179	1.35494	2.31157	94.9741	2.61317e-07	2.63644e-05	PRAG1	protein_coding
ENSG00000165359	9.49674	6.4903	-0.54879	5.96389	94.8312	2.63578e-07	2.63998e-05	INTS6L	protein_coding
ENSG00000206560	9.67798	6.83034	-0.502455	6.75975	94.6014	2.67263e-07	2.64574e-05	ANKRD28	protein_coding
ENSG00000140948	4.26956	6.28175	0.556936	5.34968	94.557	2.67981e-07	2.64574e-05	ZCCHC14	protein_coding
ENSG00000227051	7.76203	11.3488	0.547883	6.1587	92.8211	2.97916e-07	2.92042e-05	C14orf132	protein_coding
ENSG00000106483	7.16556	3.82738	-0.904997	4.26257	92.2439	3.08714e-07	2.99748e-05	SFRP4	protein_coding
ENSG00000185201	46.9117	28.6895	-0.70878	6.01784	92.1387	3.1073e-07	2.99748e-05	IFITM2	protein_coding
ENSG00000139163	4.37973	2.58873	-0.758216	5.7489	92.0582	3.12283e-07	2.99748e-05	ETNK1	protein_coding
ENSG00000187134	0.567389	0.17255	-1.71317	2.29379	91.5975	3.21346e-07	3.04513e-05	AKR1C1	protein_coding
ENSG00000109079	10.5997	15.2346	0.523059	5.59139	91.5208	3.22885e-07	3.04513e-05	TNFAIP1	protein_coding
ENSG00000172927	11.4727	6.91002	-0.731119	5.21927	91.4726	3.23856e-07	3.04513e-05	MYEOV	protein_coding
ENSG00000107021	12.6268	18.8206	0.575525	5.86517	91.3523	3.26295e-07	3.04733e-05	TBC1D13	protein_coding
ENSG00000284837	18.869	29.4085	0.64042	5.18045	91.0751	3.31994e-07	3.06266e-05	AC007846.1	lncRNA
ENSG00000111341	7.99871	4.23827	-0.916792	4.77241	90.9667	3.34254e-07	3.06266e-05	MGP	protein_coding
ENSG00000109180	35.6578	26.8691	-0.408223	7.30356	90.9509	3.34584e-07	3.06266e-05	OCIAD1	protein_coding
ENSG00000144730	18.1319	12.4818	-0.538481	7.17319	90.5834	3.42389e-07	3.11349e-05	IL17RD	protein_coding
ENSG00000122180	167.672	253.82	0.598036	7.92644	90.2082	3.50575e-07	3.16709e-05	MYOG	protein_coding
ENSG00000203727	5.00435	2.81937	-0.828119	4.58359	90.0181	3.54807e-07	3.18451e-05	SAMD5	protein_coding
ENSG00000063978	10.5631	14.8806	0.494635	6.42601	89.6644	3.62842e-07	3.23561e-05	RNF4	protein_coding
ENSG00000171475	4.51728	6.83711	0.597489	5.5534	89.2127	3.73411e-07	3.30851e-05	WIPF2	protein_coding
ENSG00000112183	20.3992	13.3468	-0.612343	5.90449	88.4708	3.91551e-07	3.42588e-05	RBM24	protein_coding
ENSG00000123684	7.16741	9.98474	0.478237	6.01041	88.3761	3.93939e-07	3.42588e-05	LPGAT1	protein_coding
ENSG00000114019	3.67424	8.15109	1.14868	5.0055	88.37	3.94093e-07	3.42588e-05	AMOTL2	protein_coding
ENSG00000005238	0.883614	1.82888	1.04691	2.99855	87.4505	4.18188e-07	3.61262e-05	FAM214B	protein_coding
ENSG00000196693	3.16505	2.0338	-0.637825	4.8239	86.2726	4.51583e-07	3.87688e-05	ZNF33B	protein_coding
ENSG00000146376	11.0865	7.3951	-0.583979	5.49034	85.4516	4.76687e-07	4.0477e-05	ARHGAP18	protein_coding
ENSG00000175215	36.3189	49.6965	0.452501	7.73401	85.431	4.77336e-07	4.0477e-05	CTDSP2	protein_coding
ENSG00000134769	1.58465	0.918138	-0.786658	3.9485	85.2464	4.83211e-07	4.07252e-05	DTNA	protein_coding
ENSG00000213064	4.30155	6.57284	0.611725	5.59728	85.1323	4.86882e-07	4.0786e-05	SFT2D2	protein_coding
ENSG00000139292	5.47843	2.2788	-1.26374	4.54576	84.7268	5.00193e-07	4.15249e-05	LGR5	protein_coding
ENSG00000117500	14.4026	10.9686	-0.392967	6.90607	84.6814	5.01712e-07	4.15249e-05	TMED5	protein_coding
ENSG00000090530	42.4259	26.1042	-0.700368	7.66719	83.7597	5.33679e-07	4.37037e-05	P3H2	protein_coding
ENSG00000214114	21.1053	14.5983	-0.531716	5.77723	83.7408	5.3436e-07	4.37037e-05	MYCBP	protein_coding
ENSG00000173705	10.9064	7.32128	-0.574889	5.278	82.9896	5.62202e-07	4.57103e-05	SUSD5	protein_coding
ENSG00000171310	9.98881	7.03333	-0.50582	6.08458	82.7333	5.72086e-07	4.6242e-05	CHST11	protein_coding
ENSG00000147010	10.6722	7.33891	-0.540271	5.7837	82.3696	5.86454e-07	4.71277e-05	SH3KBP1	protein_coding
ENSG00000162441	12.9817	9.56962	-0.439849	6.09188	82.2273	5.92188e-07	4.72006e-05	LZIC	protein_coding
ENSG00000169258	2.65693	6.0162	1.17713	3.80612	82.178	5.94191e-07	4.72006e-05	GPRIN1	protein_coding
ENSG00000124743	2.93025	4.71524	0.686284	4.2967	82.0761	5.98353e-07	4.72596e-05	KLHL31	protein_coding
ENSG00000213066	3.34131	4.83873	0.534267	5.79051	81.7212	6.13117e-07	4.81506e-05	FGFR1OP	protein_coding
ENSG00000048828	25.4748	18.482	-0.463042	7.30642	81.4724	6.23716e-07	4.87062e-05	FAM120A	protein_coding
ENSG00000145391	6.70404	4.94146	-0.439897	6.32522	80.6249	6.61449e-07	5.13626e-05	SETD7	protein_coding
ENSG00000139977	4.19251	2.71761	-0.62565	4.84549	80.3975	6.7202e-07	5.1892e-05	NAA30	protein_coding
ENSG00000196535	11.7781	9.08121	-0.375179	7.34677	79.9916	6.91373e-07	5.30897e-05	MYO18A	protein_coding
ENSG00000116990	4.27068	6.96437	0.705268	4.69394	79.7499	7.03205e-07	5.37e-05	MYCL	protein_coding
ENSG00000066583	15.4807	9.79194	-0.660745	4.69002	79.2984	7.25936e-07	5.51313e-05	ISOC1	protein_coding
ENSG00000094975	15.1117	10.2689	-0.557218	6.94338	79.1832	7.3187e-07	5.52782e-05	SUCO	protein_coding
ENSG00000088053	5.08571	2.64237	-0.944625	3.59984	78.609	7.62302e-07	5.72638e-05	GP6	protein_coding
ENSG00000108823	4.23173	8.64985	1.02858	3.73424	77.7729	8.0927e-07	6.04634e-05	SGCA	protein_coding
ENSG00000144567	20.3735	27.2509	0.419764	6.98041	77.6161	8.18445e-07	6.05563e-05	RETREG2	protein_coding
ENSG00000119772	5.81349	4.05701	-0.518858	6.10822	77.602	8.19276e-07	6.05563e-05	DNMT3A	protein_coding
ENSG00000109189	8.1651	5.97363	-0.450608	6.00479	77.4878	8.26043e-07	6.07318e-05	USP46	protein_coding
ENSG00000151012	1.89474	0.693418	-1.449	3.97747	76.9152	8.6096e-07	6.2964e-05	SLC7A11	protein_coding
ENSG00000186318	4.03486	5.81784	0.527872	4.96601	76.5557	8.83758e-07	6.42911e-05	BACE1	protein_coding
ENSG00000196396	27.6261	20.8064	-0.408924	6.68205	76.3404	8.97743e-07	6.45322e-05	PTPN1	protein_coding
ENSG00000187742	8.0812	5.30774	-0.605922	6.08045	76.3093	8.99782e-07	6.45322e-05	SECISBP2	protein_coding
ENSG00000107566	13.1956	18.6383	0.498361	5.68805	76.2896	9.01079e-07	6.45322e-05	ERLIN1	protein_coding
ENSG00000257176	1.58678	0.717804	-1.14275	3.00494	76.1018	9.13537e-07	6.50872e-05	AC009318.1	lncRNA
ENSG00000128573	3.50517	2.19646	-0.673697	5.80059	75.9692	9.22455e-07	6.53855e-05	FOXP2	protein_coding
ENSG00000164902	20.0508	14.8087	-0.437221	6.12213	75.5225	9.53247e-07	6.72234e-05	PHAX	protein_coding
ENSG00000172986	5.05261	2.87257	-0.814402	4.02935	74.9933	9.91276e-07	6.95503e-05	GXYLT2	protein_coding
ENSG00000144228	3.39619	2.18883	-0.633616	4.72539	74.5947	1.02108e-06	7.12798e-05	SPOPL	protein_coding
ENSG00000139289	13.2354	9.27465	-0.512941	6.55438	74.2358	1.0488e-06	7.2774e-05	PHLDA1	protein_coding
ENSG00000140557	4.78379	6.913	0.530889	5.0258	74.1822	1.05302e-06	7.2774e-05	ST8SIA2	protein_coding
ENSG00000180398	25.4801	19.5802	-0.379867	7.32771	74.0027	1.06728e-06	7.33924e-05	MCFD2	protein_coding
ENSG00000089057	5.56455	7.93311	0.511951	5.3266	73.6101	1.09924e-06	7.46659e-05	SLC23A2	protein_coding
ENSG00000107263	14.8006	20.0434	0.437157	6.57932	73.5976	1.10027e-06	7.46659e-05	RAPGEF1	protein_coding
ENSG00000150995	1.3199	0.898728	-0.554427	5.34143	73.5421	1.10489e-06	7.46659e-05	ITPR1	protein_coding
ENSG00000137996	21.9436	16.1336	-0.443594	5.8765	73.512	1.1074e-06	7.46659e-05	RTCA	protein_coding
ENSG00000184602	10.1043	15.2189	0.590765	5.24298	72.5721	1.18923e-06	7.97296e-05	SNN	protein_coding
ENSG00000157470	24.7068	16.9114	-0.546776	6.78229	72.5192	1.19404e-06	7.97296e-05	FAM81A	protein_coding
ENSG00000148175	1.57857	0.624733	-1.33522	1.87537	72.453	1.20009e-06	7.97483e-05	STOM	protein_coding
ENSG00000154639	5.88782	3.91318	-0.589096	4.94985	72.2322	1.22053e-06	8.07183e-05	CXADR	protein_coding
ENSG00000170540	102.761	135.635	0.400452	8.74231	72.103	1.23267e-06	8.11333e-05	ARL6IP1	protein_coding
ENSG00000117877	16.3947	11.6413	-0.493648	5.91127	71.9623	1.24606e-06	8.12987e-05	CD3EAP	protein_coding
ENSG00000124198	20.7067	15.438	-0.423452	7.51992	71.953	1.24695e-06	8.12987e-05	ARFGEF2	protein_coding
ENSG00000141441	3.32272	2.00715	-0.726481	4.33352	71.3985	1.30141e-06	8.44512e-05	GAREM1	protein_coding
ENSG00000133083	0.52904	1.03442	0.965292	3.08857	70.9898	1.34331e-06	8.6763e-05	DCLK1	protein_coding
ENSG00000144229	1.1279	0.582514	-0.951981	3.02347	70.9186	1.35077e-06	8.68389e-05	THSD7B	protein_coding
ENSG00000138780	7.29019	5.03379	-0.534436	5.43903	70.7808	1.36535e-06	8.7059e-05	GSTCD	protein_coding
ENSG00000213965	7.78309	4.62992	-0.749241	4.33206	70.7672	1.36679e-06	8.7059e-05	NUDT19	protein_coding
ENSG00000166780	29.3781	19.6434	-0.580191	6.61978	70.5878	1.38606e-06	8.78812e-05	BMERB1	protein_coding
ENSG00000139645	18.849	24.9865	0.406728	7.26711	70.272	1.42075e-06	8.95167e-05	ANKRD52	protein_coding
ENSG00000189091	29.84	23.8691	-0.322074	8.4783	70.2356	1.42481e-06	8.95167e-05	SF3B3	protein_coding
ENSG00000177354	8.41674	5.93613	-0.503599	5.35752	70.1144	1.43842e-06	8.99633e-05	C10orf71	protein_coding
ENSG00000175832	26.3813	17.7671	-0.569837	6.48089	70.0293	1.44809e-06	9.01596e-05	ETV4	protein_coding
ENSG00000265972	14.4086	21.2624	0.561034	6.16636	69.9703	1.45482e-06	9.01725e-05	TXNIP	protein_coding
ENSG00000145362	9.96488	7.34207	-0.440449	7.32587	69.7622	1.47887e-06	9.12542e-05	ANK2	protein_coding
ENSG00000187955	3.52138	2.32687	-0.597333	4.95755	69.6852	1.48789e-06	9.14028e-05	COL14A1	protein_coding
ENSG00000135624	97.4747	76.2325	-0.354546	8.34183	69.4641	1.51413e-06	9.23658e-05	CCT7	protein_coding
ENSG00000050165	5.07333	3.56465	-0.508744	6.05964	69.4354	1.51757e-06	9.23658e-05	DKK3	protein_coding
ENSG00000115414	72.0798	46.156	-0.643037	10.1709	69.3853	1.52361e-06	9.23658e-05	FN1	protein_coding
ENSG00000135902	97.4433	72.137	-0.433715	8.12556	69.1045	1.55797e-06	9.40363e-05	CHRND	protein_coding
ENSG00000137710	24.1258	18.9753	-0.346396	7.42854	68.6796	1.61166e-06	9.62885e-05	RDX	protein_coding
ENSG00000074695	31.4892	25.1872	-0.322158	7.52701	68.6448	1.61617e-06	9.62885e-05	LMAN1	protein_coding
ENSG00000156642	26.1275	19.7351	-0.404624	6.79146	68.6446	1.61619e-06	9.62885e-05	NPTN	protein_coding
ENSG00000163069	38.9382	30.8888	-0.334073	7.46442	68.4445	1.6423e-06	9.74241e-05	SGCB	protein_coding
ENSG00000102265	35.1283	24.7305	-0.505936	5.88034	68.378	1.65109e-06	9.7527e-05	TIMP1	protein_coding
ENSG00000076108	17.9349	22.9698	0.356982	7.87494	68.317	1.65919e-06	9.75459e-05	BAZ2A	protein_coding
ENSG00000100234	10.5631	6.69028	-0.658537	5.57858	68.2434	1.66904e-06	9.75459e-05	TIMP3	protein_coding
ENSG00000169139	18.7896	14.2443	-0.39964	6.83169	68.217	1.67258e-06	9.75459e-05	UBE2V2	protein_coding
ENSG00000183853	10.6655	14.6031	0.453619	6.56175	67.89	1.71724e-06	9.97301e-05	KIRREL1	protein_coding
ENSG00000140332	2.63671	3.91519	0.570039	5.08336	67.6788	1.74683e-06	0.000100917	TLE3	protein_coding
ENSG00000131389	11.3977	15.823	0.47355	6.94745	67.6403	1.75228e-06	0.000100917	SLC6A6	protein_coding
ENSG00000124098	7.50724	10.8005	0.524925	4.63635	67.3823	1.78936e-06	0.000102624	FAM210B	protein_coding
ENSG00000148120	7.8564	5.74012	-0.452515	6.49942	67.2094	1.8147e-06	0.000103648	AOPEP	protein_coding
ENSG00000025039	17.936	23.6192	0.397021	6.60373	67.0442	1.83931e-06	0.000104621	RRAGD	protein_coding
ENSG00000130695	8.93764	12.1971	0.448919	5.67186	66.7133	1.88978e-06	0.00010687	CEP85	protein_coding
ENSG00000128059	23.1437	17.7659	-0.381394	6.85856	66.684	1.89432e-06	0.00010687	PPAT	protein_coding
ENSG00000205649	9.83473	5.20638	-0.918388	4.12988	66.6029	1.90696e-06	0.000107146	HTN3	protein_coding
ENSG00000153048	25.6364	32.2558	0.331365	7.17119	66.2284	1.96664e-06	0.000110052	CARHSP1	protein_coding
ENSG00000175348	9.00186	13.1525	0.546664	5.07641	65.9747	2.00829e-06	0.00011193	TMEM9B	protein_coding
ENSG00000171848	34.3246	42.9594	0.323718	8.38811	65.6267	2.0671e-06	0.000114745	RRM2	protein_coding
ENSG00000125089	3.75452	1.93724	-0.95566	5.2207	65.5262	2.08445e-06	0.000115245	SH3TC1	protein_coding
ENSG00000198022	2.62301	1.16844	-1.16638	2.72266	65.3918	2.10793e-06	0.000115817	SAGE2P	unprocessed_pseudogene
ENSG00000186184	15.1692	12.0747	-0.329132	7.36456	65.3711	2.11156e-06	0.000115817	POLR1D	protein_coding
ENSG00000149657	48.6404	66.5967	0.453065	7.52441	65.0844	2.16276e-06	0.000117868	LSM14B	protein_coding
ENSG00000084636	6.4125	3.4277	-0.904132	5.64137	65.0665	2.166e-06	0.000117868	COL16A1	protein_coding
ENSG00000224260	2.95548	0.579679	-2.33808	2.43824	64.9436	2.18842e-06	0.000118621	AL023754.1	lncRNA
ENSG00000171033	9.21485	5.69188	-0.694414	4.71134	64.8633	2.20322e-06	0.000118957	PKIA	protein_coding
ENSG00000157500	20.7425	16.2113	-0.355478	7.16049	64.7701	2.22052e-06	0.000119195	APPL1	protein_coding
ENSG00000236491	4.50919	1.6479	-1.44783	1.53456	64.7468	2.22489e-06	0.000119195	AC234771.4	unprocessed_pseudogene
ENSG00000117569	6.01268	8.21971	0.451294	6.32291	64.6911	2.23533e-06	0.000119293	PTBP2	protein_coding
ENSG00000129675	16.2827	11.9988	-0.440197	6.09159	64.6009	2.25237e-06	0.000119739	ARHGEF6	protein_coding
ENSG00000138435	112.49	89.0305	-0.337368	8.99917	64.3094	2.30847e-06	0.000122251	CHRNA1	protein_coding
ENSG00000126561	1.07042	0.505732	-1.07898	2.57643	64.1872	2.33247e-06	0.000122778	STAT5A	protein_coding
ENSG00000175130	155.223	194.622	0.326373	7.84259	64.1562	2.3386e-06	0.000122778	MARCKSL1	protein_coding
ENSG00000186480	30.616	20.2985	-0.593243	6.80656	64.1183	2.34612e-06	0.000122778	INSIG1	protein_coding
ENSG00000132386	14.9786	10.465	-0.51766	5.70599	64.0391	2.36193e-06	0.000122778	SERPINF1	protein_coding
ENSG00000118705	387.111	307.734	-0.331041	10.0593	64.0116	2.36745e-06	0.000122778	RPN2	protein_coding
ENSG00000071575	6.24127	9.31184	0.576988	4.7602	63.9905	2.37171e-06	0.000122778	TRIB2	protein_coding
ENSG00000083720	15.9329	11.9423	-0.416077	5.73782	63.8886	2.39232e-06	0.000123383	OXCT1	protein_coding
ENSG00000277443	58.9295	77.4112	0.393414	7.97404	63.678	2.43562e-06	0.000125149	MARCKS	protein_coding
ENSG00000141682	26.5936	36.1476	0.442695	6.16985	63.6306	2.44547e-06	0.00012519	PMAIP1	protein_coding
ENSG00000196562	52.7419	71.4981	0.439022	8.38134	63.5004	2.47283e-06	0.000126123	SULF2	protein_coding
ENSG00000135108	10.7762	8.15997	-0.401221	6.26492	63.3327	2.50856e-06	0.000126903	FBXO21	protein_coding
ENSG00000132463	25.5675	19.9699	-0.356371	7.53247	63.3044	2.51466e-06	0.000126903	GRSF1	protein_coding
ENSG00000039523	16.5799	12.5824	-0.397995	6.74866	63.2997	2.51565e-06	0.000126903	RIPOR1	protein_coding
ENSG00000143603	7.218	5.53699	-0.382538	6.30965	63.1138	2.5561e-06	0.000128474	KCNN3	protein_coding
ENSG00000188070	6.77379	9.89268	0.546071	5.42511	62.9707	2.58775e-06	0.000129594	C11orf95	protein_coding
ENSG00000099250	0.726376	1.42675	0.972687	3.25171	62.7319	2.6416e-06	0.000131813	NRP1	protein_coding
ENSG00000112773	7.66854	10.4821	0.45118	5.60206	62.5735	2.67801e-06	0.000133149	TENT5A	protein_coding
ENSG00000141068	12.538	9.53559	-0.394711	7.22966	62.4261	2.71241e-06	0.000134376	KSR1	protein_coding
ENSG00000128285	5.39144	3.40865	-0.661704	3.8708	62.1452	2.77942e-06	0.000137204	MCHR1	protein_coding
ENSG00000101445	14.8236	9.27703	-0.676114	6.37214	62.0552	2.80128e-06	0.000137791	PPP1R16B	protein_coding
ENSG00000092201	73.6789	59.389	-0.311052	8.91655	61.8802	2.84439e-06	0.000139416	SUPT16H	protein_coding
ENSG00000137310	8.68234	13.5053	0.637651	5.01646	61.774	2.87093e-06	0.000140219	TCF19	protein_coding
ENSG00000074416	6.35987	4.53719	-0.486869	5.93519	61.2738	2.99978e-06	0.000145996	MGLL	protein_coding
ENSG00000181852	7.64788	11.1935	0.549754	5.70386	60.9741	3.08019e-06	0.000149384	RNF41	protein_coding
ENSG00000161021	9.01342	12.9255	0.519792	5.95748	60.5651	3.19397e-06	0.00015436	MAML1	protein_coding
ENSG00000090905	12.1158	9.14497	-0.405652	7.36594	60.1181	3.3239e-06	0.00016008	TNRC6A	protein_coding
ENSG00000214814	0.340403	0.0962174	-1.81529	1.23199	60.0324	3.34953e-06	0.000160754	FER1L6	protein_coding
ENSG00000165389	34.8536	26.9956	-0.368695	6.56542	59.9883	3.36277e-06	0.000160809	SPTSSA	protein_coding
ENSG00000114541	2.22701	1.47738	-0.591749	4.46286	59.9514	3.37393e-06	0.000160809	FRMD4B	protein_coding
ENSG00000174032	2.29741	1.43333	-0.67979	3.95728	59.8012	3.41975e-06	0.000161599	SLC25A30	protein_coding
ENSG00000135069	137.833	105.443	-0.386409	8.08342	59.767	3.43027e-06	0.000161599	PSAT1	protein_coding
ENSG00000169499	4.9934	6.76197	0.437329	5.14505	59.7385	3.43909e-06	0.000161599	PLEKHA2	protein_coding
ENSG00000118257	9.48447	7.02951	-0.432221	6.91939	59.7333	3.44071e-06	0.000161599	NRP2	protein_coding
ENSG00000139697	9.42887	7.33187	-0.362728	6.74903	59.7066	3.44897e-06	0.000161599	SBNO1	protein_coding
ENSG00000161905	10.1573	5.63314	-0.850481	4.80653	59.5999	3.48227e-06	0.000162608	ALOX15	protein_coding
ENSG00000198836	16.8835	13.0008	-0.3769	7.08165	59.4927	3.51611e-06	0.000163552	OPA1	protein_coding
ENSG00000136869	0.395261	0.14478	-1.44708	2.19894	59.4612	3.52615e-06	0.000163552	TLR4	protein_coding
ENSG00000237499	13.7894	9.03899	-0.608939	5.52575	58.9593	3.69024e-06	0.00017059	WAKMAR2	lncRNA
ENSG00000183778	1.15328	0.68131	-0.758308	3.72601	58.8567	3.72489e-06	0.000171618	B3GALT5	protein_coding
ENSG00000197045	25.6751	31.7835	0.307815	7.72332	58.7566	3.75901e-06	0.000172615	GMFB	protein_coding
ENSG00000154743	12.5077	9.16504	-0.44815	6.01187	58.6557	3.79379e-06	0.000173635	TSEN2	protein_coding
ENSG00000104343	2.85838	1.77438	-0.688607	5.11903	58.5793	3.82038e-06	0.000174275	UBE2W	protein_coding
ENSG00000107742	3.08684	1.87896	-0.715965	3.94796	58.4014	3.88312e-06	0.000176554	SPOCK2	protein_coding
ENSG00000110002	3.0094	1.60872	-0.903461	4.05082	58.0694	4.00343e-06	0.00018067	VWA5A	protein_coding
ENSG00000162630	4.18309	2.38463	-0.810004	3.49954	58.0653	4.00494e-06	0.00018067	B3GALT2	protein_coding
ENSG00000138379	27.328	20.2635	-0.431183	5.9897	58.0439	4.01286e-06	0.00018067	MSTN	protein_coding
ENSG00000272405	8.82282	6.37424	-0.469095	5.44398	58.0014	4.0286e-06	0.00018079	AL365181.3	lncRNA
ENSG00000125970	27.5305	36.3745	0.401808	7.57112	57.9197	4.0591e-06	0.000181569	RALY	protein_coding
ENSG00000135655	4.10463	2.95393	-0.474586	6.26098	57.8843	4.07237e-06	0.000181575	USP15	protein_coding
ENSG00000103978	17.8668	14.1875	-0.332622	6.87201	57.7251	4.13278e-06	0.000183668	TMEM87A	protein_coding
ENSG00000123091	24.4501	32.0182	0.389111	6.51178	57.6868	4.14745e-06	0.000183668	RNF11	protein_coding
ENSG00000064115	2.80316	4.62872	0.722999	4.13394	57.6564	4.15918e-06	0.000183668	TM7SF3	protein_coding
ENSG00000120875	6.77038	9.63719	0.508693	5.79133	57.5983	4.18164e-06	0.000184072	DUSP4	protein_coding
ENSG00000104081	2.36684	3.7973	0.681676	4.27165	57.5064	4.21744e-06	0.000184502	BMF	protein_coding
ENSG00000149218	8.50924	6.2035	-0.455925	4.98296	57.5047	4.21811e-06	0.000184502	ENDOD1	protein_coding
ENSG00000160075	35.6662	25.73	-0.470867	7.79323	57.438	4.24434e-06	0.000185064	SSU72	protein_coding
ENSG00000164144	5.91332	3.82313	-0.629485	4.45214	57.2169	4.33263e-06	0.000188319	ARFIP1	protein_coding
ENSG00000249464	0.491017	0.254521	-0.94685	2.95567	56.9771	4.43078e-06	0.000191959	LINC01091	lncRNA
ENSG00000035687	15.2246	11.4535	-0.410588	5.72347	56.9224	4.45352e-06	0.000191959	ADSS2	protein_coding
ENSG00000152402	2.54157	3.4022	0.420841	5.49883	56.9117	4.45801e-06	0.000191959	GUCY1A2	protein_coding
ENSG00000166595	63.9294	48.1213	-0.409578	5.92856	56.6276	4.57846e-06	0.000196533	CIAO2B	protein_coding
ENSG00000105948	3.3947	2.0151	-0.752575	3.93309	56.4742	4.64511e-06	0.000198776	TTC26	protein_coding
ENSG00000173221	2.54038	1.59584	-0.670661	4.4881	56.3502	4.69976e-06	0.000200494	GLRX	protein_coding
ENSG00000154229	11.0977	8.81286	-0.332594	6.92161	56.255	4.74225e-06	0.000201684	PRKCA	protein_coding
ENSG00000112079	12.0813	16.6893	0.466308	5.62623	56.1317	4.79792e-06	0.000203426	STK38	protein_coding
ENSG00000108518	679.311	530.758	-0.355989	9.83357	55.7554	4.97261e-06	0.000209843	PFN1	protein_coding
ENSG00000073792	28.0222	21.3139	-0.394737	6.82722	55.7162	4.9912e-06	0.000209843	IGF2BP2	protein_coding
ENSG00000049449	73.0986	60.1299	-0.281777	8.49972	55.7079	4.99514e-06	0.000209843	RCN1	protein_coding
ENSG00000109654	3.16979	2.12329	-0.578109	4.68676	55.6315	5.03172e-06	0.000209843	TRIM2	protein_coding
ENSG00000143375	2.57364	3.95728	0.619536	4.3923	55.5944	5.04956e-06	0.000209843	CGN	protein_coding
ENSG00000183291	64.1085	48.0718	-0.415388	7.12689	55.5936	5.04991e-06	0.000209843	SELENOF	protein_coding
ENSG00000171552	16.0034	21.0809	0.397607	5.9242	55.5617	5.06533e-06	0.000209843	BCL2L1	protein_coding
ENSG00000137962	10.5618	8.21183	-0.36296	7.38734	55.5506	5.07073e-06	0.000209843	ARHGAP29	protein_coding
ENSG00000010278	39.4775	30.0722	-0.392572	7.18329	55.4131	5.13785e-06	0.000211986	CD9	protein_coding
ENSG00000122824	3.75945	1.97582	-0.926171	2.64432	55.367	5.16063e-06	0.000212292	NUDT10	protein_coding
ENSG00000152332	11.4919	9.15448	-0.328028	7.039	55.1753	5.25644e-06	0.000215592	UHMK1	protein_coding
ENSG00000111725	5.7771	3.89356	-0.568572	5.06417	55.0327	5.32903e-06	0.00021739	PRKAB1	protein_coding
ENSG00000108061	8.52327	6.13296	-0.474776	5.21766	55.0275	5.33173e-06	0.00021739	SHOC2	protein_coding
ENSG00000168952	7.002	5.27845	-0.407492	5.67965	54.969	5.36184e-06	0.000217975	STXBP6	protein_coding
ENSG00000122707	10.9439	7.95128	-0.460903	5.85164	54.5198	5.59999e-06	0.000226988	RECK	protein_coding
ENSG00000136205	7.45771	5.83993	-0.352833	6.42745	54.4857	5.61857e-06	0.000227076	TNS3	protein_coding
ENSG00000186716	2.24416	3.26786	0.541587	5.00617	54.455	5.63536e-06	0.00022709	BCR	protein_coding
ENSG00000133104	37.8531	29.9836	-0.33613	7.8833	54.3805	5.67629e-06	0.000228075	SPART	protein_coding
ENSG00000141446	6.7337	4.83274	-0.478475	5.13872	54.2831	5.73037e-06	0.00022958	ESCO1	protein_coding
ENSG00000130741	72.7734	58.6839	-0.310395	8.06771	54.2297	5.76029e-06	0.00022991	EIF2S3	protein_coding
ENSG00000006652	18.1609	14.2951	-0.345451	7.03351	54.209	5.77187e-06	0.00022991	IFRD1	protein_coding
ENSG00000112139	2.29168	3.45429	0.59199	5.00087	54.0043	5.88844e-06	0.000233659	MDGA1	protein_coding
ENSG00000100426	7.94698	10.8187	0.444571	5.81119	53.9847	5.89979e-06	0.000233659	ZBED4	protein_coding
ENSG00000108515	16.6851	11.9565	-0.480899	6.12544	53.8683	5.96739e-06	0.000235237	ENO3	protein_coding
ENSG00000116704	6.02231	4.29187	-0.488375	4.95184	53.8576	5.97368e-06	0.000235237	SLC35D1	protein_coding
ENSG00000103449	3.27567	2.119	-0.627784	4.14158	53.8237	5.99356e-06	0.000235349	SALL1	protein_coding
ENSG00000108604	7.42301	10.7699	0.536292	5.03918	53.7138	6.0586e-06	0.00023723	SMARCD2	protein_coding
ENSG00000206195	1.80319	1.16652	-0.627384	4.12544	53.6062	6.12302e-06	0.000239074	DUXAP8	lncRNA
ENSG00000213853	14.3629	17.6076	0.293821	7.00218	53.5156	6.17789e-06	0.000240538	EMP2	protein_coding
ENSG00000029993	32.9547	42.0613	0.352056	6.91517	53.3667	6.26937e-06	0.000243235	HMGB3	protein_coding
ENSG00000105793	3.29001	2.3527	-0.483979	4.90717	53.3457	6.28238e-06	0.000243235	GTPBP10	protein_coding
ENSG00000125827	7.70845	5.37371	-0.52061	5.63333	53.1977	6.37503e-06	0.000246133	TMX4	protein_coding
ENSG00000187498	21.4062	15.8152	-0.43678	8.25058	53.1694	6.3929e-06	0.000246135	COL4A1	protein_coding
ENSG00000162889	22.2831	31.25	0.488119	6.55712	53.1333	6.41584e-06	0.000246333	MAPKAPK2	protein_coding
ENSG00000004777	1.42532	2.74539	0.943407	3.01034	52.7401	6.67165e-06	0.000255445	ARHGAP33	protein_coding
ENSG00000145555	1.21114	2.04824	0.756669	4.25746	52.6335	6.74306e-06	0.000257466	MYO10	protein_coding
ENSG00000113739	122.559	94.5427	-0.374457	9.52162	52.5006	6.83326e-06	0.000260191	STC2	protein_coding
ENSG00000148730	29.0837	35.7679	0.298562	7.7887	52.4406	6.87444e-06	0.00026104	EIF4EBP2	protein_coding
ENSG00000136436	3.06849	4.55765	0.569981	4.92796	52.3661	6.92599e-06	0.000262277	CALCOCO2	protein_coding
ENSG00000144827	26.8252	20.9694	-0.355154	6.21545	52.3387	6.94509e-06	0.000262281	ABHD10	protein_coding
ENSG00000198909	3.66441	5.41828	0.564731	4.42268	52.1663	7.06646e-06	0.000265498	MAP3K3	protein_coding
ENSG00000166619	21.9593	26.8682	0.291133	7.8653	52.1632	7.06867e-06	0.000265498	BLCAP	protein_coding
ENSG00000173698	0.961466	0.542349	-0.824955	3.35416	51.8914	7.26515e-06	0.000272138	ADGRG2	protein_coding
ENSG00000115762	18.967	23.2313	0.292649	7.25088	51.7016	7.40602e-06	0.000276665	PLEKHB2	protein_coding
ENSG00000198842	3.62358	5.46246	0.590797	4.51516	51.3736	7.6571e-06	0.000285273	DUSP27	protein_coding
ENSG00000144560	12.8004	16.5244	0.368065	7.00154	51.2952	7.7186e-06	0.000286791	VGLL4	protein_coding
ENSG00000113282	16.4184	12.9627	-0.340901	6.60952	51.0693	7.89889e-06	0.000292088	CLINT1	protein_coding
ENSG00000233828	0.251046	0.0462826	-2.4194	0.562583	51.0637	7.90342e-06	0.000292088	LINC01949	lncRNA
ENSG00000138764	10.4228	14.0952	0.4351	6.48889	51.0049	7.95118e-06	0.00029307	CCNG2	protein_coding
ENSG00000127022	166.256	130.835	-0.345648	10.1973	50.8814	8.05259e-06	0.000296018	CANX	protein_coding
ENSG00000102755	3.11745	1.93457	-0.688024	5.30673	50.7756	8.14065e-06	0.000298133	FLT1	protein_coding
ENSG00000165138	13.448	10.2299	-0.394472	6.63167	50.7605	8.15327e-06	0.000298133	ANKS6	protein_coding
ENSG00000159147	14.2257	18.2278	0.357489	5.75825	50.6336	8.26059e-06	0.000301261	DONSON	protein_coding
ENSG00000107854	9.60084	7.201	-0.414762	5.88612	50.4141	8.45e-06	0.000307358	TNKS2	protein_coding
ENSG00000138639	2.40595	1.6378	-0.55465	4.50758	50.3565	8.50058e-06	0.000308386	ARHGAP24	protein_coding
ENSG00000104313	10.9662	8.19754	-0.419482	6.48741	50.2237	8.61845e-06	0.000311843	EYA1	protein_coding
ENSG00000068305	12.2702	15.5794	0.344624	6.63735	49.9397	8.87686e-06	0.000319535	MEF2A	protein_coding
ENSG00000135333	22.9007	17.6103	-0.379081	7.5201	49.9393	8.87726e-06	0.000319535	EPHA7	protein_coding
ENSG00000136997	19.06	14.5668	-0.387964	6.30378	49.8731	8.93872e-06	0.000320912	MYC	protein_coding
ENSG00000062485	54.0156	40.3329	-0.421251	8.10538	49.5417	9.25424e-06	0.000331357	CS	protein_coding
ENSG00000171320	6.66888	8.45084	0.341603	5.9398	49.5177	9.27761e-06	0.000331357	ESCO2	protein_coding
ENSG00000134444	5.97224	4.70019	-0.345593	6.02378	49.4214	9.37193e-06	0.000332272	RELCH	protein_coding
ENSG00000114491	9.10956	7.07662	-0.364402	6.06685	49.4016	9.39152e-06	0.000332272	UMPS	protein_coding
ENSG00000099246	23.2502	18.5335	-0.327013	7.11162	49.3738	9.41898e-06	0.000332272	RAB18	protein_coding
ENSG00000081320	8.04889	6.11005	-0.397715	5.84514	49.3714	9.42141e-06	0.000332272	STK17B	protein_coding
ENSG00000007314	3.94863	2.68991	-0.553723	5.071	49.3694	9.42343e-06	0.000332272	SCN4A	protein_coding
ENSG00000108669	3.79644	5.45512	0.522427	5.21838	49.2588	9.53379e-06	0.000335308	CYTH1	protein_coding
ENSG00000116525	12.5641	9.48951	-0.404742	5.54024	49.23	9.56281e-06	0.000335475	TRIM62	protein_coding
ENSG00000159658	17.4651	21.8297	0.322001	7.03279	49.167	9.6266e-06	0.000336858	EFCAB14	protein_coding
ENSG00000271254	6.0609	4.09448	-0.565242	4.53056	48.8585	9.94626e-06	0.000347165	AC240274.1	protein_coding
ENSG00000169129	2.4232	1.55537	-0.639479	3.36989	48.7199	1.00938e-05	0.000351042	AFAP1L2	protein_coding
ENSG00000163697	4.584	5.94441	0.374922	5.98686	48.7066	1.01082e-05	0.000351042	APBB2	protein_coding
ENSG00000169641	7.22613	9.39666	0.379223	6.49977	48.599	1.02247e-05	0.000354198	LUZP1	protein_coding
ENSG00000010818	8.29134	5.8891	-0.492996	6.79334	48.5603	1.02669e-05	0.000354772	HIVEP2	protein_coding
ENSG00000196284	4.89234	3.24164	-0.592578	4.70531	48.5221	1.03088e-05	0.000355332	SUPT3H	protein_coding
ENSG00000197872	8.335	5.55226	-0.585588	5.56837	48.4852	1.03496e-05	0.000355851	FAM49A	protein_coding
ENSG00000100077	6.25766	4.60342	-0.442398	5.8304	48.416	1.04263e-05	0.0003576	GRK3	protein_coding
ENSG00000076716	2.04284	3.30014	0.690782	3.93099	48.3135	1.05414e-05	0.00036065	GPC4	protein_coding
ENSG00000138756	6.6654	4.82171	-0.466537	5.992	48.2493	1.06141e-05	0.000362242	BMP2K	protein_coding
ENSG00000164164	7.65629	6.01709	-0.347377	6.24742	48.0102	1.08904e-05	0.000369939	OTUD4	protein_coding
ENSG00000175893	5.73083	3.81935	-0.584866	5.56826	48.0004	1.09018e-05	0.000369939	ZDHHC21	protein_coding
ENSG00000135052	41.4886	33.8869	-0.29192	7.39287	47.985	1.09199e-05	0.000369939	GOLM1	protein_coding
ENSG00000224982	13.5597	9.58024	-0.500869	5.15068	47.8926	1.10292e-05	0.000372727	TMEM233	protein_coding
ENSG00000141580	48.0721	59.703	0.312499	7.57936	47.8043	1.11348e-05	0.0003749	WDR45B	protein_coding
ENSG00000063180	19.0366	13.5729	-0.488379	5.48897	47.7754	1.11697e-05	0.0003749	CA11	protein_coding
ENSG00000165156	17.9123	14.0698	-0.348221	6.86573	47.7515	1.11986e-05	0.0003749	ZHX1	protein_coding
ENSG00000130338	7.01797	9.48436	0.43462	6.53367	47.7449	1.12065e-05	0.0003749	TULP4	protein_coding
ENSG00000151208	16.137	19.7345	0.29028	7.31788	47.7263	1.12291e-05	0.0003749	DLG5	protein_coding
ENSG00000185052	1.74089	2.96088	0.765305	2.72243	47.6205	1.13584e-05	0.000378304	SLC24A3	protein_coding
ENSG00000235501	2.12613	3.85054	0.855785	2.63401	47.4317	1.15936e-05	0.000385208	AC105942.1	lncRNA
ENSG00000187210	3.95869	2.82307	-0.487897	5.05118	47.3855	1.1652e-05	0.000386042	GCNT1	protein_coding
ENSG00000155100	12.3902	9.54371	-0.376581	5.55746	47.3511	1.16958e-05	0.000386042	OTUD6B	protein_coding
ENSG00000182054	39.9409	49.3838	0.306175	6.82751	47.3458	1.17025e-05	0.000386042	IDH2	protein_coding
ENSG00000065809	2.6843	3.8513	0.521178	4.57019	47.2828	1.17831e-05	0.000387775	FAM107B	protein_coding
ENSG00000141540	11.1436	7.83961	-0.506703	5.77113	47.2575	1.18155e-05	0.00038792	TTYH2	protein_coding
ENSG00000204856	13.9861	10.5801	-0.402591	5.23279	47.0563	1.20782e-05	0.000394749	FAM216A	protein_coding
ENSG00000108262	18.8688	26.1736	0.471898	6.79622	47.0544	1.20806e-05	0.000394749	GIT1	protein_coding
ENSG00000139269	3.67837	2.29359	-0.680137	3.93652	47.0054	1.21456e-05	0.000395935	INHBE	protein_coding
ENSG00000146476	35.8741	26.0238	-0.463415	6.65273	46.8072	1.24125e-05	0.000403685	ARMT1	protein_coding
ENSG00000197747	44.0081	57.9535	0.396782	5.45303	46.7546	1.24845e-05	0.000404538	S100A10	protein_coding
ENSG00000104765	21.3979	26.9294	0.331693	6.87767	46.7453	1.24973e-05	0.000404538	BNIP3L	protein_coding
ENSG00000107829	6.52327	4.72462	-0.465328	4.92607	46.6662	1.26065e-05	0.00040712	FBXW4	protein_coding
ENSG00000146535	18.793	24.1612	0.36233	6.85503	46.563	1.27508e-05	0.000410821	GNA12	protein_coding
ENSG00000122694	36.2796	44.7316	0.302129	6.81916	46.5206	1.28106e-05	0.000411787	GLIPR2	protein_coding
ENSG00000152767	1.02679	1.38736	0.434137	5.2788	46.4817	1.28658e-05	0.0004126	FARP1	protein_coding
ENSG00000139112	13.9267	10.7246	-0.376917	5.73576	46.2184	1.32464e-05	0.000423824	GABARAPL1	protein_coding
ENSG00000130382	11.4379	17.1781	0.585757	5.89372	46.1797	1.33034e-05	0.000424664	MLLT1	protein_coding
ENSG00000073464	10.149	7.64365	-0.408648	5.8017	46.0411	1.351e-05	0.000429396	CLCN4	protein_coding
ENSG00000081760	2.64864	1.94634	-0.444539	5.34239	46.0386	1.35138e-05	0.000429396	AACS	protein_coding
ENSG00000198363	4.94163	3.94322	-0.325383	6.40491	45.9577	1.36362e-05	0.000432291	ASPH	protein_coding
ENSG00000110987	5.23185	7.05298	0.430489	5.17765	45.9192	1.36948e-05	0.000433158	BCL7A	protein_coding
ENSG00000183091	5.95031	7.64124	0.361	7.58645	45.8977	1.37277e-05	0.000433206	NEB	protein_coding
ENSG00000165895	4.89535	3.63995	-0.427423	5.57688	45.8722	1.37669e-05	0.000433454	ARHGAP42	protein_coding
ENSG00000112406	6.58603	9.1447	0.47324	5.25474	45.7348	1.398e-05	0.000439164	HECA	protein_coding
ENSG00000174628	2.64615	1.67167	-0.662357	3.54454	45.5901	1.42085e-05	0.000445323	IQCK	protein_coding
ENSG00000095139	105.665	83.782	-0.334689	8.55097	45.57	1.42405e-05	0.000445323	ARCN1	protein_coding
ENSG00000109756	1.32594	0.743338	-0.833461	3.96825	45.5422	1.42851e-05	0.000445709	RAPGEF2	protein_coding
ENSG00000168795	16.9441	21.7831	0.362802	6.37391	45.4619	1.44146e-05	0.000448735	ZBTB5	protein_coding
ENSG00000162981	0.617392	1.23516	1.00057	2.72026	45.3699	1.45646e-05	0.000451877	LRATD1	protein_coding
ENSG00000158560	1.97251	1.15166	-0.775764	2.85464	45.36	1.45809e-05	0.000451877	DYNC1I1	protein_coding
ENSG00000125398	10.5365	7.22365	-0.545093	5.22025	45.3193	1.46479e-05	0.000452937	SOX9	protein_coding
ENSG00000198843	19.3669	14.8914	-0.37907	6.44545	45.2523	1.4759e-05	0.000455354	SELENOT	protein_coding
ENSG00000112175	21.8726	16.8998	-0.371997	6.57648	45.1594	1.49147e-05	0.000459134	BMP5	protein_coding
ENSG00000166783	6.87716	4.94452	-0.47546	6.09595	45.1016	1.50126e-05	0.00046112	MARF1	protein_coding
ENSG00000091844	2.46341	1.39174	-0.822209	4.05073	44.9335	1.53014e-05	0.000468948	RGS17	protein_coding
ENSG00000081189	2.71173	3.96324	0.547127	5.13083	44.8319	1.54791e-05	0.000473344	MEF2C	protein_coding
ENSG00000148660	7.59372	5.79775	-0.389247	5.62046	44.5976	1.58978e-05	0.000485077	CAMK2G	protein_coding
ENSG00000134369	7.77771	6.30393	-0.303006	7.1614	44.4699	1.61317e-05	0.000490657	NAV1	protein_coding
ENSG00000130066	4.07951	6.66799	0.708195	3.74877	44.4591	1.61517e-05	0.000490657	SAT1	protein_coding
ENSG00000153707	36.8394	28.9601	-0.347173	8.67534	44.4391	1.61887e-05	0.000490703	PTPRD	protein_coding
ENSG00000085721	24.1511	19.6798	-0.295406	6.57609	44.3693	1.63186e-05	0.000493556	RRN3	protein_coding
ENSG00000149212	12.8364	9.18113	-0.483283	7.21192	44.2728	1.65003e-05	0.000497965	SESN3	protein_coding
ENSG00000219481	3.31302	2.39851	-0.465492	5.16068	44.2036	1.66321e-05	0.000500846	NBPF1	protein_coding
ENSG00000145386	111.006	91.4309	-0.27984	8.09044	44.1627	1.67105e-05	0.000502114	CCNA2	protein_coding
ENSG00000280128	3.05092	1.78676	-0.7712	3.07639	44.1199	1.67932e-05	0.000503503	AL662795.2	TEC
ENSG00000138434	10.1234	8.07445	-0.326356	6.57762	44.097	1.68375e-05	0.000503739	ITPRID2	protein_coding
ENSG00000122729	6.4541	8.41092	0.382022	5.69694	43.8738	1.7277e-05	0.000515771	ACO1	protein_coding
ENSG00000189108	3.01488	1.67789	-0.845407	2.62754	43.8428	1.7339e-05	0.000516508	IL1RAPL2	protein_coding
ENSG00000107105	6.15004	8.56308	0.476907	5.20362	43.6912	1.76464e-05	0.000524535	ELAVL2	protein_coding
ENSG00000240857	6.97203	3.89995	-0.836916	3.27299	43.6129	1.78077e-05	0.000528192	RDH14	protein_coding
ENSG00000186472	0.919542	1.31039	0.511374	4.31622	43.5508	1.79366e-05	0.000530878	PCLO	protein_coding
ENSG00000139496	24.8896	20.7748	-0.260715	8.12717	43.4873	1.80697e-05	0.000532593	NUP58	protein_coding
ENSG00000132718	6.49131	4.34267	-0.580205	4.85947	43.4864	1.80716e-05	0.000532593	SYT11	protein_coding
ENSG00000019549	11.6187	8.37537	-0.471764	5.09641	43.3988	1.82572e-05	0.000536918	SNAI2	protein_coding
ENSG00000134323	19.9423	25.976	0.380856	5.80456	43.3583	1.83436e-05	0.000538313	MYCN	protein_coding
ENSG00000181754	12.4282	8.73698	-0.507947	5.65217	43.321	1.84238e-05	0.000539522	AMIGO1	protein_coding
ENSG00000115461	1.54963	3.53782	1.18845	3.66509	43.2594	1.8557e-05	0.000541872	IGFBP5	protein_coding
ENSG00000138316	10.9232	7.96128	-0.456377	5.72017	43.2476	1.85825e-05	0.000541872	ADAMTS14	protein_coding
ENSG00000155366	26.3219	32.4388	0.301329	6.85468	43.1067	1.88918e-05	0.000549732	RHOC	protein_coding
ENSG00000164684	20.6808	16.1366	-0.357801	8.09301	43.0559	1.90048e-05	0.000551857	ZNF704	protein_coding
ENSG00000137103	0.954106	1.40598	0.558161	4.02922	42.9557	1.92298e-05	0.000557222	TMEM8B	protein_coding
ENSG00000104643	5.72613	4.31132	-0.4089	5.68646	42.8271	1.95235e-05	0.000563812	MTMR9	protein_coding
ENSG00000117461	1.36875	2.26209	0.724117	3.87013	42.8204	1.95389e-05	0.000563812	PIK3R3	protein_coding
ENSG00000083123	8.76001	6.58747	-0.411499	5.18584	42.7246	1.97611e-05	0.000569038	BCKDHB	protein_coding
ENSG00000187678	12.462	9.50653	-0.390185	6.37131	42.6466	1.9944e-05	0.000573112	SPRY4	protein_coding
ENSG00000114450	7.18522	5.55568	-0.371096	5.45909	42.5417	2.01933e-05	0.000578203	GNB4	protein_coding
ENSG00000170396	5.40283	3.69346	-0.548512	4.64792	42.5369	2.02049e-05	0.000578203	ZNF804A	protein_coding
ENSG00000115641	15.3119	11.5657	-0.404346	6.55927	42.4255	2.04736e-05	0.000584683	FHL2	protein_coding
ENSG00000171724	1.18766	0.492574	-1.27	1.71304	42.3803	2.0584e-05	0.000586477	VAT1L	protein_coding
ENSG00000162542	3.54646	2.2209	-0.675116	3.7356	42.3651	2.06213e-05	0.000586477	TMCO4	protein_coding
ENSG00000181026	14.5699	18.5149	0.345607	6.49665	42.2653	2.08675e-05	0.000592261	AEN	protein_coding
ENSG00000101470	1.7108	5.40708	1.64808	1.57729	42.1624	2.11253e-05	0.000598349	TNNC2	protein_coding
ENSG00000147655	2.7822	1.54691	-0.845363	3.7457	42.129	2.12098e-05	0.000599062	RSPO2	protein_coding
ENSG00000100422	26.6676	22.0308	-0.275543	6.92367	42.1181	2.12372e-05	0.000599062	CERK	protein_coding
ENSG00000136280	4.66236	6.5332	0.486337	5.47442	42.0509	2.14086e-05	0.000602381	CCM2	protein_coding
ENSG00000197451	202.943	169.357	-0.26099	8.64517	42.0379	2.1442e-05	0.000602381	HNRNPAB	protein_coding
ENSG00000205730	1.56965	2.51104	0.676268	3.84225	41.8505	2.19288e-05	0.000614808	ITPRIPL2	protein_coding
ENSG00000113583	20.5194	15.5522	-0.39973	5.55932	41.7242	2.22644e-05	0.000622952	C5orf15	protein_coding
ENSG00000149084	15.4308	12.6241	-0.289625	6.83584	41.6969	2.23377e-05	0.000623457	HSD17B12	protein_coding
ENSG00000108861	52.7	64.0919	0.282441	7.9397	41.6839	2.23727e-05	0.000623457	DUSP3	protein_coding
ENSG00000132669	2.59242	1.78539	-0.538774	4.39941	41.5713	2.26785e-05	0.000630709	RIN2	protein_coding
ENSG00000107551	20.6749	25.296	0.291088	7.62015	41.5298	2.27925e-05	0.000632606	RASSF4	protein_coding
ENSG00000100906	7.78563	10.6249	0.448531	4.48268	41.4997	2.28754e-05	0.000633635	NFKBIA	protein_coding
ENSG00000140479	3.83977	2.39004	-0.682955	5.22905	41.4223	2.30907e-05	0.00063832	PCSK6	protein_coding
ENSG00000101166	99.0065	81.6588	-0.277865	8.18961	41.3366	2.33315e-05	0.00064369	PRELID3B	protein_coding
ENSG00000135387	67.4971	56.7013	-0.251427	9.15686	41.2678	2.3527e-05	0.000647789	CAPRIN1	protein_coding
ENSG00000085733	21.256	16.7473	-0.343975	7.09732	41.0368	2.41976e-05	0.00066493	CTTN	protein_coding
ENSG00000051108	17.8222	13.759	-0.373126	6.41204	40.8768	2.46751e-05	0.000676705	HERPUD1	protein_coding
ENSG00000119729	26.2488	21.48	-0.289166	7.0557	40.858	2.4732e-05	0.000676921	RHOQ	protein_coding
ENSG00000159023	2.63351	3.31537	0.332468	5.82591	40.8097	2.48783e-05	0.000679581	EPB41	protein_coding
ENSG00000197586	16.7761	20.854	0.313893	7.00511	40.7255	2.51364e-05	0.000685277	ENTPD6	protein_coding
ENSG00000160404	1.37301	2.31006	0.749256	2.59582	40.6743	2.52951e-05	0.000688245	TOR2A	protein_coding
ENSG00000186918	4.96163	6.63282	0.41904	5.02692	40.6558	2.53524e-05	0.000688451	ZNF395	protein_coding
ENSG00000149256	1.7942	1.26038	-0.50905	4.56908	40.4039	2.6151e-05	0.000708094	TENM4	protein_coding
ENSG00000174684	13.4275	8.97414	-0.582109	4.62812	40.3954	2.61783e-05	0.000708094	B4GAT1	protein_coding
ENSG00000013375	10.6308	8.2885	-0.358812	6.17568	40.1563	2.69643e-05	0.000725186	PGM3	protein_coding
ENSG00000048140	8.96636	11.7563	0.390543	5.52479	40.1461	2.69983e-05	0.000725186	TSPAN17	protein_coding
ENSG00000134013	28.6015	19.5199	-0.55128	7.70751	40.1385	2.70238e-05	0.000725186	LOXL2	protein_coding
ENSG00000114383	8.26653	11.6532	0.496181	4.73494	40.1249	2.70696e-05	0.000725186	TUSC2	protein_coding
ENSG00000153310	27.7299	22.9032	-0.275878	7.95584	40.124	2.70725e-05	0.000725186	FAM49B	protein_coding
ENSG00000239474	37.4131	56.0196	0.581936	6.79239	40.024	2.74109e-05	0.000731623	KLHL41	protein_coding
ENSG00000152503	1.48836	2.2128	0.571896	3.31143	40.0217	2.74187e-05	0.000731623	TRIM36	protein_coding
ENSG00000116985	4.92305	3.30488	-0.575116	4.20222	39.9511	2.76606e-05	0.000736112	BMP8B	protein_coding
ENSG00000165300	1.39365	1.01152	-0.461908	4.41195	39.939	2.77024e-05	0.000736112	SLITRK5	protein_coding
ENSG00000238227	19.0671	29.8372	0.645029	6.15813	39.9144	2.77872e-05	0.000736112	TMEM250	protein_coding
ENSG00000120438	152.802	127.295	-0.263491	9.47055	39.9108	2.77999e-05	0.000736112	TCP1	protein_coding
ENSG00000140848	4.82101	6.55057	0.442606	5.37509	39.8456	2.80268e-05	0.000740702	CPNE2	protein_coding
ENSG00000073584	2.31983	1.80067	-0.365438	5.36916	39.7662	2.8306e-05	0.00074578	SMARCE1	protein_coding
ENSG00000106299	9.97565	7.76209	-0.361909	5.46112	39.7454	2.83796e-05	0.00074578	WASL	protein_coding
ENSG00000135835	4.33274	3.19121	-0.441621	5.3305	39.745	2.83809e-05	0.00074578	KIAA1614	protein_coding
ENSG00000169032	29.7724	23.9129	-0.315945	7.20889	39.7144	2.84896e-05	0.000747217	MAP2K1	protein_coding
ENSG00000137845	26.8169	22.6017	-0.246694	8.9071	39.6666	2.86606e-05	0.000750279	ADAM10	protein_coding
ENSG00000071967	15.9044	12.1419	-0.389074	6.72643	39.642	2.87491e-05	0.000751173	CYBRD1	protein_coding
ENSG00000136158	25.7341	20.5384	-0.325156	6.52914	39.6253	2.88091e-05	0.00075132	SPRY2	protein_coding
ENSG00000198042	21.9344	17.3289	-0.339738	6.50136	39.6055	2.88807e-05	0.000751769	MAK16	protein_coding
ENSG00000189266	38.5188	48.3406	0.327728	6.65978	39.5778	2.89812e-05	0.000752967	PNRC2	protein_coding
ENSG00000137824	5.48076	7.37913	0.428578	4.84672	39.5625	2.90371e-05	0.000753003	RMDN3	protein_coding
ENSG00000111144	10.8891	8.72493	-0.319651	6.30798	39.5302	2.91548e-05	0.00075464	LTA4H	protein_coding
ENSG00000168874	4.56882	6.24088	0.449801	5.27704	39.4106	2.95965e-05	0.00076464	ATOH8	protein_coding
ENSG00000204209	37.7634	30.0518	-0.329332	6.73603	39.3953	2.96534e-05	0.000764682	DAXX	protein_coding
ENSG00000169689	18.4318	24.0567	0.383792	5.12569	39.3609	2.9782e-05	0.000766568	CENPX	protein_coding
ENSG00000124641	17.3215	22.5558	0.38138	5.96194	39.3339	2.98837e-05	0.000767755	MED20	protein_coding
ENSG00000085741	1.18428	0.540222	-1.12903	1.52651	39.243	3.02282e-05	0.000775165	WNT11	protein_coding
ENSG00000113448	1.96717	1.37914	-0.511618	4.8976	39.2028	3.03821e-05	0.000777669	PDE4D	protein_coding
ENSG00000206418	26.2635	20.9485	-0.326168	5.9268	39.0914	3.08129e-05	0.000787238	RAB12	protein_coding
ENSG00000143515	5.41698	4.16283	-0.379653	5.30595	39.0165	3.11067e-05	0.000793279	ATP8B2	protein_coding
ENSG00000170522	16.4709	13.2364	-0.315427	6.84052	38.868	3.16991e-05	0.000806897	ELOVL6	protein_coding
ENSG00000134874	6.50499	4.9332	-0.398702	5.63475	38.8285	3.18585e-05	0.000808404	DZIP1	protein_coding
ENSG00000129422	0.741981	1.1072	0.577679	3.54425	38.8146	3.19149e-05	0.000808404	MTUS1	protein_coding
ENSG00000101871	6.0705	3.72903	-0.70197	5.51957	38.81	3.19338e-05	0.000808404	MID1	protein_coding
ENSG00000167565	13.3253	17.7691	0.415462	4.84059	38.7934	3.20015e-05	0.000808636	SERTAD3	protein_coding
ENSG00000146386	24.8272	34.4873	0.474061	4.94033	38.6978	3.23937e-05	0.000817053	ABRACL	protein_coding
ENSG00000157152	2.42476	3.75873	0.632582	4.08393	38.6748	3.2489e-05	0.000817966	SYN2	protein_coding
ENSG00000162851	18.9377	14.2834	-0.406696	5.11854	38.6575	3.25606e-05	0.000818277	TFB2M	protein_coding
ENSG00000127472	0.532769	0.151225	-1.80649	0.512274	38.6428	3.2622e-05	0.000818334	PLA2G5	protein_coding
ENSG00000266709	5.31655	2.96203	-0.843859	3.1307	38.6033	3.27871e-05	0.000820983	AC005224.3	lncRNA
ENSG00000213626	2.54638	3.67942	0.530766	3.63816	38.5741	3.29096e-05	0.000822563	LBH	protein_coding
ENSG00000154864	3.44501	2.40119	-0.520493	5.58615	38.5497	3.30127e-05	0.00082365	PIEZO2	protein_coding
ENSG00000167306	1.22629	0.79188	-0.631754	4.49497	38.4523	3.3427e-05	0.000832482	MYO5B	protein_coding
ENSG00000038210	9.27124	12.3454	0.412828	5.12331	38.3465	3.38839e-05	0.000842344	PI4K2B	protein_coding
ENSG00000133111	7.98738	11.0414	0.466723	4.1213	38.2686	3.42253e-05	0.000849304	RFXAP	protein_coding
ENSG00000166135	9.95	7.82521	-0.346335	7.02725	38.1833	3.46034e-05	0.000857148	HIF1AN	protein_coding
ENSG00000158747	3.50019	5.10437	0.543233	3.74667	38.1654	3.46836e-05	0.000857266	NBL1	protein_coding
ENSG00000047648	4.11055	2.92261	-0.491669	5.04061	38.145	3.47748e-05	0.000857266	ARHGAP6	protein_coding
ENSG00000141552	6.11702	8.56251	0.484322	4.78588	38.1406	3.47943e-05	0.000857266	ANAPC11	protein_coding
ENSG00000103855	37.6939	27.5747	-0.450934	7.7574	38.0388	3.5255e-05	0.000866666	CD276	protein_coding
ENSG00000107798	3.83408	2.43214	-0.657118	3.91513	38.0287	3.53012e-05	0.000866666	LIPA	protein_coding
ENSG00000157570	20.2393	15.9421	-0.344147	6.71079	37.9115	3.5841e-05	0.000878359	TSPAN18	protein_coding
ENSG00000164751	3.67157	5.06202	0.463402	4.37183	37.8406	3.61719e-05	0.000884899	PEX2	protein_coding
ENSG00000198324	1.50938	3.00226	0.988926	2.6313	37.7829	3.64439e-05	0.000889979	PHETA1	protein_coding
ENSG00000171105	0.951082	1.38273	0.539969	3.8295	37.7345	3.66743e-05	0.000893048	INSR	protein_coding
ENSG00000119616	14.0223	10.8004	-0.37652	5.92228	37.7185	3.67505e-05	0.000893048	FCF1	protein_coding
ENSG00000156603	10.8955	14.796	0.440998	4.48685	37.7158	3.67634e-05	0.000893048	MED19	protein_coding
ENSG00000185532	2.81458	1.89058	-0.574116	4.94179	37.6821	3.69252e-05	0.000895404	PRKG1	protein_coding
ENSG00000162614	5.93317	7.99543	0.430434	4.68011	37.6511	3.70748e-05	0.000897456	NEXN	protein_coding
ENSG00000170624	1.13575	1.66826	0.554534	3.72527	37.5209	3.771e-05	0.000910514	SGCD	protein_coding
ENSG00000015171	5.25531	3.87081	-0.440967	4.7659	37.5136	3.7746e-05	0.000910514	ZMYND11	protein_coding
ENSG00000142459	2.12922	3.4596	0.698779	3.79303	37.4952	3.78365e-05	0.000911108	EVI5L	protein_coding
ENSG00000090054	16.7827	13.9289	-0.26879	6.7997	37.3648	3.8488e-05	0.000924241	SPTLC1	protein_coding
ENSG00000118194	1.44185	2.16987	0.589503	3.87252	37.3594	3.85156e-05	0.000924241	TNNT2	protein_coding
ENSG00000116191	5.87121	7.23323	0.30098	5.70539	37.1916	3.93734e-05	0.000942954	RALGPS2	protein_coding
ENSG00000137955	20.8761	16.6983	-0.322151	6.89884	37.1803	3.94319e-05	0.000942954	RABGGTB	protein_coding
ENSG00000163872	14.1731	11.7571	-0.269495	7.09931	37.1574	3.95511e-05	0.000944173	YEATS2	protein_coding
ENSG00000238097	0.540419	0.116124	-2.1944	0.483264	37.1187	3.97531e-05	0.000947357	LINC02037	lncRNA
ENSG00000143013	22.3758	17.9487	-0.317918	6.76083	37.0435	4.01494e-05	0.000954661	LMO4	protein_coding
ENSG00000169429	0.520384	0.15614	-1.72075	1.28744	37.0344	4.01977e-05	0.000954661	CXCL8	protein_coding
ENSG00000103852	12.8399	10.4831	-0.292579	6.24845	36.9931	4.04173e-05	0.000957189	TTC23	protein_coding
ENSG00000166949	3.84561	5.2518	0.44977	5.29284	36.9884	4.04426e-05	0.000957189	SMAD3	protein_coding
ENSG00000136404	5.63257	3.5514	-0.663914	3.44511	36.9129	4.08482e-05	0.000964719	TM6SF1	protein_coding
ENSG00000184524	6.8011	2.94684	-1.20916	2.93595	36.9032	4.09004e-05	0.000964719	CEND1	protein_coding
ENSG00000135535	41.2737	48.7743	0.24087	8.4096	36.8787	4.10333e-05	0.000966204	CD164	protein_coding
ENSG00000105991	3.96959	2.39782	-0.726529	3.09582	36.8082	4.14184e-05	0.000972714	HOXA1	protein_coding
ENSG00000224470	14.9431	18.3605	0.297331	7.09596	36.8024	4.14505e-05	0.000972714	ATXN1L	protein_coding
ENSG00000144057	9.8712	13.3123	0.431925	6.16522	36.7449	4.1768e-05	0.000976987	ST6GAL2	protein_coding
ENSG00000171056	1.1478	1.93773	0.753885	2.14126	36.7438	4.17739e-05	0.000976987	SOX7	protein_coding
ENSG00000162599	0.519637	0.38328	-0.438434	4.82442	36.6289	4.2417e-05	0.00099035	NFIA	protein_coding
ENSG00000139722	15.2738	21.2835	0.478295	6.46808	36.4955	4.31779e-05	0.00100642	VPS37B	protein_coding
ENSG00000081248	0.231078	0.522453	1.17561	1.06193	36.4769	4.32849e-05	0.00100721	CACNA1S	protein_coding
ENSG00000165716	20.2637	14.7824	-0.455568	5.76533	36.3933	4.37709e-05	0.00101681	DIPK1B	protein_coding
ENSG00000110422	13.3814	16.3464	0.288895	6.95674	36.3136	4.42405e-05	0.00102354	HIPK3	protein_coding
ENSG00000160191	3.81819	2.62823	-0.538596	4.28094	36.3117	4.42517e-05	0.00102354	PDE9A	protein_coding
ENSG00000165731	0.631923	0.276365	-1.19258	2.15507	36.3065	4.4283e-05	0.00102354	RET	protein_coding
ENSG00000205476	1.79415	2.51141	0.484318	4.9194	35.9848	4.62396e-05	0.00106558	CCDC85C	protein_coding
ENSG00000124145	14.8207	20.3846	0.459824	5.53551	35.973	4.63138e-05	0.00106558	SDC4	protein_coding
ENSG00000090520	33.3184	27.4731	-0.278273	7.58831	35.9699	4.6333e-05	0.00106558	DNAJB11	protein_coding
ENSG00000164442	14.2415	19.7362	0.470282	5.51945	35.9574	4.64109e-05	0.0010656	CITED2	protein_coding
ENSG00000175093	28.1053	34.1555	0.281188	6.72295	35.896	4.67974e-05	0.00107154	SPSB4	protein_coding
ENSG00000182534	13.9136	11.3307	-0.296193	7.03796	35.8917	4.68247e-05	0.00107154	MXRA7	protein_coding
ENSG00000183723	7.81866	9.57404	0.292328	6.02246	35.8119	4.73327e-05	0.00107863	CMTM4	protein_coding
ENSG00000170144	139.193	117.698	-0.241994	9.52719	35.808	4.7358e-05	0.00107863	HNRNPA3	protein_coding
ENSG00000215114	16.1317	12.9995	-0.311247	6.21208	35.8063	4.73687e-05	0.00107863	UBXN2B	protein_coding
ENSG00000067167	29.8667	25.1242	-0.249514	6.89137	35.7936	4.74506e-05	0.00107872	TRAM1	protein_coding
ENSG00000132938	0.932242	1.43087	0.618191	2.99562	35.7002	4.80549e-05	0.00109067	MTUS2	protein_coding
ENSG00000185722	5.10668	4.03939	-0.338248	6.2333	35.6609	4.83122e-05	0.00109415	ANKFY1	protein_coding
ENSG00000133606	8.34768	10.3604	0.311458	5.87334	35.6526	4.83669e-05	0.00109415	MKRN1	protein_coding
ENSG00000075711	4.92461	6.00731	0.286612	6.47912	35.5386	4.91225e-05	0.00110943	DLG1	protein_coding
ENSG00000163877	4.92065	6.39169	0.377142	5.13997	35.4634	4.96285e-05	0.00111903	SNIP1	protein_coding
ENSG00000103528	3.0236	2.12706	-0.506379	4.42516	35.407	5.0012e-05	0.00112425	SYT17	protein_coding
ENSG00000115271	3.08904	4.55885	0.562602	4.21727	35.4021	5.00452e-05	0.00112425	GCA	protein_coding
ENSG00000153714	7.14053	5.18301	-0.461987	4.10268	35.3935	5.01039e-05	0.00112425	LURAP1L	protein_coding
ENSG00000133069	1.35573	2.18102	0.684095	2.87157	35.3507	5.03977e-05	0.00112458	TMCC2	protein_coding
ENSG00000134333	124.347	104.689	-0.248261	9.5719	35.3498	5.04043e-05	0.00112458	LDHA	protein_coding
ENSG00000136802	13.5119	19.4025	0.521228	6.0943	35.3474	5.04207e-05	0.00112458	LRRC8A	protein_coding
ENSG00000127980	11.9885	9.79739	-0.290958	6.54007	35.344	5.0444e-05	0.00112458	PEX1	protein_coding
ENSG00000140105	33.0338	26.2711	-0.330256	7.56054	35.3281	5.05539e-05	0.00112521	WARS1	protein_coding
ENSG00000175662	2.28818	3.28471	0.520581	4.21516	35.3121	5.06644e-05	0.00112586	TOM1L2	protein_coding
ENSG00000124126	67.4075	53.5507	-0.33207	8.7493	35.2488	5.11059e-05	0.00113385	PREX1	protein_coding
ENSG00000174136	5.28994	6.991	0.401937	5.18441	35.2342	5.1208e-05	0.00113429	RGMB	protein_coding
ENSG00000159720	7.67638	9.67914	0.334693	5.99436	35.1739	5.16332e-05	0.00114188	ATP6V0D1	protein_coding
ENSG00000132356	11.9424	9.14434	-0.38488	6.32632	35.022	5.27231e-05	0.00116412	PRKAA1	protein_coding
ENSG00000167703	1.39155	2.12807	0.612068	4.05911	34.9949	5.292e-05	0.00116499	SLC43A2	protein_coding
ENSG00000166311	6.63631	9.22763	0.475556	4.2221	34.9934	5.2931e-05	0.00116499	SMPD1	protein_coding
ENSG00000076641	1.27238	0.736724	-0.786885	3.63167	34.9605	5.31715e-05	0.00116842	PAG1	protein_coding
ENSG00000084090	82.5927	97.6058	0.241013	8.55683	34.8987	5.36266e-05	0.00117655	STARD7	protein_coding
ENSG00000124333	18.3221	14.7454	-0.313393	5.49079	34.8641	5.38832e-05	0.00118031	VAMP7	protein_coding
ENSG00000108018	10.3898	8.52406	-0.285393	6.52162	34.7904	5.44352e-05	0.00118798	SORCS1	protein_coding
ENSG00000117318	77.3998	114.339	0.562688	7.00162	34.7893	5.44433e-05	0.00118798	ID3	protein_coding
ENSG00000176490	2.00344	3.16683	0.658595	2.86186	34.783	5.44911e-05	0.00118798	DIRAS1	protein_coding
ENSG00000118217	12.894	10.5264	-0.292456	6.63188	34.728	5.49076e-05	0.00119181	ATF6	protein_coding
ENSG00000179134	9.03871	11.9597	0.403865	6.13385	34.7275	5.49116e-05	0.00119181	SAMD4B	protein_coding
ENSG00000185442	5.96045	8.04209	0.432406	4.90303	34.7257	5.49256e-05	0.00119181	FAM174B	protein_coding
ENSG00000174028	4.63355	2.07817	-1.15383	1.51624	34.7011	5.51125e-05	0.00119399	FAM3C2	processed_pseudogene
ENSG00000132970	7.05216	4.98201	-0.501286	4.92485	34.6356	5.56162e-05	0.00120302	WASF3	protein_coding
ENSG00000196177	3.79916	2.75224	-0.465156	4.40933	34.5613	5.61931e-05	0.00121359	ACADSB	protein_coding
ENSG00000198478	2.11072	1.26904	-0.731812	3.1208	34.5093	5.66014e-05	0.00122051	SH3BGRL2	protein_coding
ENSG00000166068	10.8443	8.50745	-0.349908	6.29759	34.4774	5.68529e-05	0.00122402	SPRED1	protein_coding
ENSG00000148700	7.03495	5.22154	-0.430443	5.38582	34.4299	5.72305e-05	0.00122551	ADD3	protein_coding
ENSG00000260804	4.89849	3.39638	-0.527558	3.59941	34.4265	5.72578e-05	0.00122551	LINC01963	lncRNA
ENSG00000005189	2.19506	3.33115	0.601212	3.47702	34.4265	5.72583e-05	0.00122551	REXO5	protein_coding
ENSG00000214357	10.531	14.2113	0.431977	6.18841	34.4242	5.72765e-05	0.00122551	NEURL1B	protein_coding
ENSG00000145911	34.8887	25.0696	-0.477125	7.74634	34.3719	5.7696e-05	0.00123257	N4BP3	protein_coding
ENSG00000197956	46.4063	31.8688	-0.542932	5.6143	34.3309	5.80275e-05	0.00123745	S100A6	protein_coding
ENSG00000060982	41.9817	36.0268	-0.220683	8.8122	34.3215	5.81034e-05	0.00123745	BCAT1	protein_coding
ENSG00000196110	1.26486	1.91807	0.600294	3.47889	34.2093	5.90233e-05	0.00125511	ZNF699	protein_coding
ENSG00000112619	3.38832	2.05745	-0.718282	3.02215	34.1879	5.92006e-05	0.00125554	PRPH2	protein_coding
ENSG00000130598	4.14503	7.37186	0.830166	2.56756	34.1849	5.92253e-05	0.00125554	TNNI2	protein_coding
ENSG00000140320	8.56437	11.1425	0.379022	5.66198	34.1601	5.94318e-05	0.00125779	BAHD1	protein_coding
ENSG00000061337	6.86349	8.83937	0.364766	5.22614	34.1503	5.95134e-05	0.00125779	LZTS1	protein_coding
ENSG00000135148	9.49335	12.6433	0.413511	5.09161	34.1312	5.96734e-05	0.00125925	TRAFD1	protein_coding
ENSG00000155111	7.60083	9.32442	0.294723	6.12664	34.0754	6.01425e-05	0.00126721	CDK19	protein_coding
ENSG00000184470	4.80782	3.44793	-0.480324	5.2806	34.038	6.04596e-05	0.00127195	TXNRD2	protein_coding
ENSG00000133597	1.91761	3.25102	0.759469	2.67366	33.903	6.16207e-05	0.00129441	ADCK2	protein_coding
ENSG00000110400	52.9401	64.1294	0.276646	8.63282	33.793	6.25855e-05	0.00131209	NECTIN1	protein_coding
ENSG00000144815	23.7509	20.0989	-0.240821	7.6598	33.7855	6.26523e-05	0.00131209	NXPE3	protein_coding
ENSG00000151292	9.01648	7.00719	-0.363574	5.48164	33.7043	6.33766e-05	0.00132525	CSNK1G3	protein_coding
ENSG00000135439	4.49022	3.27455	-0.456228	4.69962	33.6814	6.35825e-05	0.00132755	AGAP2	protein_coding
ENSG00000148672	26.0074	21.6827	-0.262381	6.57044	33.6569	6.3804e-05	0.00133017	GLUD1	protein_coding
ENSG00000128567	13.6484	10.628	-0.360733	6.3192	33.6339	6.40125e-05	0.0013325	PODXL	protein_coding
ENSG00000130433	3.7969	6.05314	0.672507	3.59507	33.571	6.45863e-05	0.00134077	CACNG6	protein_coding
ENSG00000125968	16.7253	30.9424	0.885747	4.58317	33.5692	6.46037e-05	0.00134077	ID1	protein_coding
ENSG00000243335	3.88635	5.053	0.379112	4.89571	33.5536	6.47466e-05	0.00134172	KCTD7	protein_coding
ENSG00000164161	5.30863	4.12318	-0.364117	5.56912	33.5051	6.51947e-05	0.00134724	HHIP	protein_coding
ENSG00000106617	0.76256	0.525523	-0.536237	3.75866	33.5037	6.5208e-05	0.00134724	PRKAG2	protein_coding
ENSG00000163590	2.23363	2.89949	0.37637	4.79739	33.4851	6.53809e-05	0.0013488	PPM1L	protein_coding
ENSG00000105197	15.254	12.7754	-0.255765	6.65053	33.424	6.59527e-05	0.00135857	TIMM50	protein_coding
ENSG00000035862	28.7233	36.1891	0.333424	7.51957	33.3967	6.62097e-05	0.00136183	TIMP2	protein_coding
ENSG00000110811	8.65796	5.77126	-0.585851	5.45701	33.3689	6.64727e-05	0.00136521	P3H3	protein_coding
ENSG00000106615	29.7566	36.1403	0.280292	6.86582	33.341	6.67383e-05	0.00136863	RHEB	protein_coding
ENSG00000143434	8.2214	12.2536	0.574575	5.59576	33.2682	6.74369e-05	0.00137887	SEMA6C	protein_coding
ENSG00000101193	61.2632	72.9017	0.251019	8.09389	33.2681	6.74373e-05	0.00137887	GID8	protein_coding
ENSG00000083857	8.20396	10.3757	0.339063	7.15508	33.017	6.99112e-05	0.00142735	FAT1	protein_coding
ENSG00000149488	0.209291	0.0561633	-1.87867	0.00453262	32.9761	7.0324e-05	0.00143366	TMC2	protein_coding
ENSG00000127824	134.188	111.3	-0.269721	8.97851	32.9413	7.06783e-05	0.00143876	TUBA4A	protein_coding
ENSG00000182568	0.648561	0.363297	-0.834646	2.85665	32.9203	7.08927e-05	0.001441	SATB1	protein_coding
ENSG00000138660	6.85599	5.1975	-0.399605	5.44246	32.8943	7.11586e-05	0.00144428	AP1AR	protein_coding
ENSG00000103494	2.94751	2.32989	-0.339095	5.10935	32.8107	7.20232e-05	0.00145909	RPGRIP1L	protein_coding
ENSG00000117016	7.02173	5.21026	-0.429874	5.62725	32.8034	7.20995e-05	0.00145909	RIMS3	protein_coding
ENSG00000119862	3.36088	2.2503	-0.578209	3.74884	32.7755	7.23904e-05	0.00146284	LGALSL	protein_coding
ENSG00000224078	2.04832	1.64287	-0.318011	7.80297	32.5851	7.44173e-05	0.00150059	SNHG14	lncRNA
ENSG00000244306	1.30054	0.917268	-0.503943	3.87824	32.5796	7.4476e-05	0.00150059	AL589743.1	transcribed_processed_pseudogene
ENSG00000162413	12.1679	15.0784	0.309462	6.4502	32.56	7.4689e-05	0.00150269	KLHL21	protein_coding
ENSG00000196678	4.99827	6.2988	0.333527	5.19447	32.518	7.51467e-05	0.00150971	ERI2	protein_coding
ENSG00000169169	7.31903	5.54745	-0.400041	5.38501	32.4686	7.56887e-05	0.00151787	CPT1C	protein_coding
ENSG00000145685	3.99583	3.07972	-0.375617	4.92097	32.461	7.57728e-05	0.00151787	LHFPL2	protein_coding
ENSG00000106868	4.28353	6.05349	0.498408	4.75296	32.3907	7.65532e-05	0.00153128	SUSD1	protein_coding
ENSG00000135823	7.38111	5.99194	-0.300614	5.81015	32.3718	7.67646e-05	0.0015333	STX6	protein_coding
ENSG00000184185	2.87489	1.87138	-0.620346	4.4063	32.3505	7.70046e-05	0.00153587	KCNJ12	protein_coding
ENSG00000221988	11.3694	8.35792	-0.443182	5.07749	32.2977	7.7601e-05	0.00154486	PPT2	protein_coding
ENSG00000169604	18.6076	14.6251	-0.347389	7.33325	32.2908	7.76787e-05	0.00154486	ANTXR1	protein_coding
ENSG00000064393	3.53934	4.50685	0.34854	5.55296	32.2523	7.81179e-05	0.00155136	HIPK2	protein_coding
ENSG00000196821	30.0178	35.6541	0.248349	7.1168	32.2243	7.84396e-05	0.00155347	ILRUN	protein_coding
ENSG00000115170	10.661	8.56026	-0.316528	5.55311	32.2234	7.84492e-05	0.00155347	ACVR1	protein_coding
ENSG00000164236	0.905071	1.34503	0.572401	3.33188	31.994	8.11381e-05	0.00160442	ANKRD33B	protein_coding
ENSG00000143499	12.3838	10.0092	-0.307199	5.71937	31.9842	8.12551e-05	0.00160444	SMYD2	protein_coding
ENSG00000165934	13.3197	10.6883	-0.317358	7.33551	31.9456	8.17192e-05	0.0016113	CPSF2	protein_coding
ENSG00000119686	1.06917	1.6713	0.642664	2.93166	31.925	8.19678e-05	0.0016139	FLVCR2	protein_coding
ENSG00000248905	1.53083	1.1367	-0.430115	5.02102	31.8561	8.28057e-05	0.00162808	FMN1	protein_coding
ENSG00000164465	1.1323	1.79881	0.666871	3.18548	31.845	8.29413e-05	0.00162843	DCBLD1	protein_coding
ENSG00000112893	4.84945	6.09913	0.330288	6.03247	31.8297	8.31291e-05	0.00162851	MAN2A1	protein_coding
ENSG00000115966	6.80232	8.47793	0.317838	5.43012	31.8255	8.31812e-05	0.00162851	ATF2	protein_coding
ENSG00000181433	2.29445	1.17661	-0.963792	2.52248	31.757	8.40284e-05	0.00164277	SAGE1	protein_coding
ENSG00000141424	36.1054	30.1391	-0.26054	7.13889	31.6757	8.50469e-05	0.00166034	SLC39A6	protein_coding
ENSG00000025772	26.8751	34.0864	0.343333	5.84999	31.6659	8.51707e-05	0.00166041	TOMM34	protein_coding
ENSG00000151967	0.623291	0.263548	-1.23634	1.98084	31.6268	8.56671e-05	0.00166773	SCHIP1	protein_coding
ENSG00000125630	6.91715	5.65554	-0.290389	5.83674	31.5688	8.6409e-05	0.00167875	POLR1B	protein_coding
ENSG00000153993	9.25706	7.35364	-0.331954	5.88266	31.5505	8.66435e-05	0.00167875	SEMA3D	protein_coding
ENSG00000017797	8.12576	9.94907	0.291836	6.01878	31.5454	8.67094e-05	0.00167875	RALBP1	protein_coding
ENSG00000181450	2.57677	1.95272	-0.39955	4.60846	31.5324	8.68784e-05	0.00167875	ZNF678	protein_coding
ENSG00000087088	25.3652	31.4719	0.310906	6.08608	31.4984	8.73184e-05	0.00167875	BAX	protein_coding
ENSG00000115866	113.785	97.3501	-0.225036	9.01564	31.4968	8.73397e-05	0.00167875	DARS1	protein_coding
ENSG00000142279	0.821449	1.41992	0.78708	3.71822	31.4938	8.73792e-05	0.00167875	WTIP	protein_coding
ENSG00000163171	4.85692	6.44758	0.408767	5.8695	31.4887	8.74458e-05	0.00167875	CDC42EP3	protein_coding
ENSG00000123453	1.77558	1.17147	-0.600135	3.19143	31.484	8.75067e-05	0.00167875	SARDH	protein_coding
ENSG00000104472	18.8033	14.2502	-0.399515	5.70685	31.4774	8.75925e-05	0.00167875	CHRAC1	protein_coding
ENSG00000132334	0.171907	0.0672836	-1.34652	0.942371	31.4737	8.76405e-05	0.00167875	PTPRE	protein_coding
ENSG00000107130	25.321	32.591	0.36389	7.1252	31.4699	8.76904e-05	0.00167875	NCS1	protein_coding
ENSG00000116918	6.55538	5.2104	-0.331016	5.34997	31.4113	8.84608e-05	0.00169115	TSNAX	protein_coding
ENSG00000150753	98.1714	82.0436	-0.25886	8.97612	31.3876	8.87742e-05	0.0016948	CCT5	protein_coding
ENSG00000082781	20.587	17.2026	-0.259096	7.1064	31.3386	8.94271e-05	0.00170491	ITGB5	protein_coding
ENSG00000129116	12.7428	10.496	-0.279771	6.99744	31.3132	8.97676e-05	0.00170905	PALLD	protein_coding
ENSG00000166411	12.2946	9.80387	-0.326382	6.29828	31.3021	8.99162e-05	0.00170952	IDH3A	protein_coding
ENSG00000113369	5.38584	6.88785	0.354937	5.15258	31.2722	9.03198e-05	0.00171348	ARRDC3	protein_coding
ENSG00000066136	13.7689	10.978	-0.326799	6.29602	31.2683	9.03722e-05	0.00171348	NFYC	protein_coding
ENSG00000267489	0.105396	0.0108659	-3.20539	-0.449262	31.2346	9.08304e-05	0.00171903	LINC01837	lncRNA
ENSG00000151632	0.352512	0.104775	-1.7368	1.52724	31.2284	9.09138e-05	0.00171903	AKR1C2	protein_coding
ENSG00000108239	1.80403	2.6084	0.531086	3.95198	31.2029	9.12626e-05	0.00172327	TBC1D12	protein_coding
ENSG00000066654	16.9128	14.2059	-0.251624	6.7873	31.1592	9.18635e-05	0.00173225	THUMPD1	protein_coding
ENSG00000035499	12.357	16.1013	0.381221	5.56526	31.1299	9.2269e-05	0.00173752	DEPDC1B	protein_coding
ENSG00000131779	13.2481	9.52192	-0.475925	4.35834	31.0234	9.37588e-05	0.00176318	PEX11B	protein_coding
ENSG00000174460	56.9148	47.1786	-0.270752	6.82054	31.0093	9.39578e-05	0.00176377	ZCCHC12	protein_coding
ENSG00000175701	2.3081	4.22345	0.867832	2.69074	31.0031	9.40457e-05	0.00176377	MTLN	protein_coding
ENSG00000198947	4.38742	3.54932	-0.305628	6.36128	30.9934	9.41832e-05	0.00176396	DMD	protein_coding
ENSG00000064655	12.4812	15.6433	0.326118	5.24394	30.9822	9.43436e-05	0.00176457	EYA2	protein_coding
ENSG00000111913	3.47141	4.42385	0.349791	4.8236	30.9501	9.48004e-05	0.00177026	RIPOR2	protein_coding
ENSG00000184992	9.40966	7.49017	-0.328843	5.77699	30.9429	9.49037e-05	0.00177026	BRI3BP	polymorphic_pseudogene
ENSG00000118503	21.7224	17.4775	-0.313615	6.69442	30.8903	9.56606e-05	0.00178197	TNFAIP3	protein_coding
ENSG00000004059	39.568	49.2195	0.314806	6.00443	30.8583	9.61254e-05	0.00178822	ARF5	protein_coding
ENSG00000134996	14.9832	9.72872	-0.622566	4.04986	30.8475	9.62818e-05	0.00178872	OSTF1	protein_coding
ENSG00000119655	8.24275	10.5813	0.36052	4.71369	30.726	9.80711e-05	0.00181951	NPC2	protein_coding
ENSG00000109265	1.44342	2.08071	0.526329	3.53179	30.6967	9.85072e-05	0.00182516	CRACD	protein_coding
ENSG00000125378	2.51899	4.02916	0.677966	3.36297	30.6877	9.86419e-05	0.0018252	BMP4	protein_coding
ENSG00000119661	2.84051	3.66407	0.367427	4.90067	30.574	0.000100362	0.00185267	DNAL1	protein_coding
ENSG00000196358	2.40248	1.40667	-0.772617	4.05511	30.572	0.000100394	0.00185267	NTNG2	protein_coding
ENSG00000119866	0.63993	0.444365	-0.526396	3.86668	30.511	0.000101332	0.00186747	BCL11A	protein_coding
ENSG00000114573	8.89654	7.18126	-0.309199	5.49106	30.4756	0.00010188	0.00187508	ATP6V1A	protein_coding
ENSG00000170439	3.22491	1.33918	-1.26484	2.2508	30.4196	0.000102754	0.00188866	METTL7B	protein_coding
ENSG00000087266	3.0334	2.4305	-0.319831	5.25158	30.3936	0.000103165	0.00189368	SH3BP2	protein_coding
ENSG00000082684	0.19527	0.0683905	-1.50359	0.962938	30.2177	0.000105982	0.00194226	SEMA5B	protein_coding
ENSG00000214140	0.247175	0.0771104	-1.66863	0.298115	30.2076	0.000106147	0.00194226	PRCD	protein_coding
ENSG00000117228	0.670563	0.291413	-1.2002	1.13894	30.2021	0.000106237	0.00194226	GBP1	protein_coding
ENSG00000170162	4.17583	7.24678	0.792306	3.12125	30.1938	0.000106373	0.00194226	VGLL2	protein_coding
ENSG00000173267	1.26937	0.491318	-1.36311	1.58754	30.1749	0.000106682	0.00194511	SNCG	protein_coding
ENSG00000204160	8.67436	10.8476	0.322647	5.71071	30.1671	0.000106811	0.00194511	ZDHHC18	protein_coding
ENSG00000138678	0.75592	0.369793	-1.03002	1.35201	30.1497	0.000107095	0.00194773	GPAT3	protein_coding
ENSG00000144824	48.3068	41.4647	-0.220309	9.26123	30.0846	0.000108175	0.00196478	PHLDB2	protein_coding
ENSG00000280287	1.32059	2.45623	0.891078	2.84406	30.0752	0.000108332	0.00196504	AC131212.3	TEC
ENSG00000130294	6.27143	4.74049	-0.404182	6.47359	30.0598	0.000108589	0.00196521	KIF1A	protein_coding
ENSG00000107821	12.3308	9.63542	-0.355873	5.5349	30.0576	0.000108625	0.00196521	KAZALD1	protein_coding
ENSG00000143376	2.66527	2.13715	-0.318518	5.37041	30.0038	0.000109531	0.00197643	SNX27	protein_coding
ENSG00000143437	6.45254	8.14415	0.336239	5.57605	30.0038	0.000109532	0.00197643	ARNT	protein_coding
ENSG00000115756	7.40155	5.14017	-0.526779	5.50006	29.9573	0.00011032	0.00198806	HPCAL1	protein_coding
ENSG00000187398	10.9465	8.9283	-0.293921	6.40653	29.9164	0.000111021	0.00199808	LUZP2	protein_coding
ENSG00000173402	41.7663	32.9663	-0.34132	7.81299	29.871	0.000111803	0.00200955	DAG1	protein_coding
ENSG00000077713	20.0634	16.028	-0.323615	5.52652	29.8575	0.000112037	0.00201115	SLC25A43	protein_coding
ENSG00000139644	61.0284	73.8267	0.274723	8.86289	29.8416	0.000112314	0.00201349	TMBIM6	protein_coding
ENSG00000145604	193.436	158.054	-0.291384	9.61189	29.7632	0.000113688	0.00203548	SKP2	protein_coding
ENSG00000244405	40.2449	32.6207	-0.302861	7.96491	29.7438	0.000114032	0.002039	ETV5	protein_coding
ENSG00000100307	0.545298	0.922317	0.755079	2.43459	29.7192	0.000114468	0.00204416	CBX7	protein_coding
ENSG00000116205	1.38758	1.95241	0.49193	4.22817	29.6971	0.000114862	0.00204681	TCEANC2	protein_coding
ENSG00000180354	7.52144	9.67864	0.364162	5.75135	29.6942	0.000114913	0.00204681	MTURN	protein_coding
ENSG00000174099	6.91831	5.52924	-0.323	5.45069	29.6828	0.000115117	0.00204781	MSRB3	protein_coding
ENSG00000100625	7.46247	6.09765	-0.291209	5.66945	29.6655	0.000115429	0.00205071	SIX4	protein_coding
ENSG00000065361	7.96413	10.1429	0.349278	6.35562	29.6106	0.00011642	0.00206386	ERBB3	protein_coding
ENSG00000114948	10.6602	8.53501	-0.320496	5.95789	29.6079	0.000116467	0.00206386	ADAM23	protein_coding
ENSG00000174132	4.32632	2.63569	-0.714725	2.43214	29.5747	0.000117072	0.00207192	FAM174A	protein_coding
ENSG00000140092	0.389415	0.125096	-1.63067	1.00569	29.5422	0.000117667	0.00207979	FBLN5	protein_coding
ENSG00000162004	0.926959	0.453451	-1.02988	2.01942	29.5244	0.000117994	0.00208291	CCDC78	protein_coding
ENSG00000072062	25.9233	21.9699	-0.23863	7.2255	29.5003	0.00011844	0.0020881	PRKACA	protein_coding
ENSG00000163517	29.4925	24.7297	-0.254115	6.96444	29.4712	0.00011898	0.00209305	HDAC11	protein_coding
ENSG00000125629	3.56874	2.3834	-0.582333	3.74043	29.4689	0.000119023	0.00209305	INSIG2	protein_coding
ENSG00000115419	8.61845	7.09895	-0.279977	6.37242	29.4569	0.000119248	0.00209433	GLS	protein_coding
ENSG00000011198	0.937039	1.43293	0.611765	3.16282	29.3789	0.000120713	0.00211485	ABHD5	protein_coding
ENSG00000081051	9.28362	6.77195	-0.454765	4.82008	29.3703	0.000120874	0.00211485	AFP	protein_coding
ENSG00000134970	17.2539	14.3762	-0.263072	6.07597	29.3703	0.000120875	0.00211485	TMED7	protein_coding
ENSG00000065427	93.9388	77.9551	-0.26899	8.48353	29.2986	0.000122242	0.00213607	KARS1	protein_coding
ENSG00000136141	2.75897	2.04599	-0.430889	4.56724	29.242	0.000123334	0.00215242	LRCH1	protein_coding
ENSG00000196368	30.5462	37.3366	0.289443	6.19123	29.2249	0.000123667	0.00215551	NUDT11	protein_coding
ENSG00000225733	69.231	57.064	-0.278705	8.48044	29.1845	0.000124455	0.00216653	FGD5-AS1	lncRNA
ENSG00000198919	20.0132	17.0994	-0.227006	7.05734	29.1479	0.000125175	0.00217359	DZIP3	protein_coding
ENSG00000171444	5.69466	4.45299	-0.354651	5.77371	29.1479	0.000125176	0.00217359	MCC	protein_coding
ENSG00000198408	21.6418	25.1598	0.217308	7.39456	29.1189	0.000125749	0.0021808	OGA	protein_coding
ENSG00000100462	68.6102	57.131	-0.264102	7.7804	29.0966	0.000126192	0.00218574	PRMT5	protein_coding
ENSG00000167123	5.19628	6.73443	0.373933	5.04538	29.0744	0.000126636	0.0021907	CERCAM	protein_coding
ENSG00000092051	1.16337	0.587071	-0.988242	2.7949	29.0208	0.000127713	0.00220657	JPH4	protein_coding
ENSG00000085117	80.4353	67.4583	-0.253931	8.37208	29.0086	0.000127959	0.00220805	CD82	protein_coding
ENSG00000129353	67.4534	81.2027	0.267725	8.41937	28.9915	0.000128307	0.00221129	SLC44A2	protein_coding
ENSG00000054654	0.752784	1.00853	0.422463	4.72726	28.959	0.000128968	0.00221881	SYNE2	protein_coding
ENSG00000100104	5.92452	4.46343	-0.408374	4.53968	28.941	0.000129336	0.00221881	SRRD	protein_coding
ENSG00000155849	5.54894	4.48125	-0.308104	5.46497	28.9403	0.000129349	0.00221881	ELMO1	protein_coding
ENSG00000142949	15.4773	11.3825	-0.443184	7.21612	28.9386	0.000129385	0.00221881	PTPRF	protein_coding
ENSG00000168509	4.20002	6.51952	0.631609	3.75966	28.9292	0.000129578	0.00221936	HJV	protein_coding
ENSG00000049130	3.74341	2.65487	-0.494918	4.51467	28.9186	0.000129797	0.00222036	KITLG	protein_coding
ENSG00000060749	13.9461	11.2684	-0.307252	7.28315	28.906	0.000130055	0.00222204	QSER1	protein_coding
ENSG00000144711	10.7869	13.4443	0.317347	6.77365	28.8901	0.000130383	0.00222312	IQSEC1	protein_coding
ENSG00000146409	7.88077	5.93065	-0.410583	4.25488	28.8874	0.000130441	0.00222312	SLC18B1	protein_coding
ENSG00000197429	2.00484	2.97267	0.567422	3.1201	28.8698	0.000130804	0.00222657	IPP	protein_coding
ENSG00000167767	30.0476	25.4371	-0.2403	7.10812	28.784	0.0001326	0.00225436	KRT80	protein_coding
ENSG00000141314	1.19321	1.87835	0.653162	2.9982	28.7433	0.000133461	0.00226621	RHBDL3	protein_coding
ENSG00000149294	12.7267	15.6998	0.302845	7.42954	28.6844	0.00013472	0.00228286	NCAM1	protein_coding
ENSG00000100097	349.083	282.763	-0.304018	8.55014	28.682	0.000134772	0.00228286	LGALS1	protein_coding
ENSG00000187764	0.121959	0.256437	1.06498	1.31122	28.672	0.000134987	0.00228371	SEMA4D	protein_coding
ENSG00000102931	26.6175	35.2023	0.403929	5.7369	28.5518	0.000137603	0.00232512	ARL2BP	protein_coding
ENSG00000100075	23.1448	29.3839	0.343824	5.55634	28.4984	0.000138785	0.00234222	SLC25A1	protein_coding
ENSG00000135636	2.00755	1.19614	-0.747186	4.51028	28.4523	0.000139815	0.00235674	DYSF	protein_coding
ENSG00000167193	22.5151	27.0544	0.26497	6.59364	28.4014	0.000140962	0.00236756	CRK	protein_coding
ENSG00000154065	1.70792	1.17318	-0.54164	3.28149	28.4002	0.000140988	0.00236756	ANKRD29	protein_coding
ENSG00000139579	26.0377	32.1616	0.305036	5.93767	28.3998	0.000140997	0.00236756	NABP2	protein_coding
ENSG00000091129	5.53271	3.69126	-0.583909	5.62489	28.3934	0.000141143	0.00236756	NRCAM	protein_coding
ENSG00000011021	4.08307	5.03767	0.303202	5.18554	28.385	0.000141334	0.0023679	CLCN6	protein_coding
ENSG00000064270	0.296872	0.129474	-1.19309	1.41301	28.3586	0.000141934	0.00237508	ATP2C2	protein_coding
ENSG00000007866	9.60502	12.3193	0.359012	4.87904	28.351	0.000142107	0.00237509	TEAD3	protein_coding
ENSG00000149596	5.6855	7.16074	0.332869	4.93721	28.2987	0.000143307	0.00239226	JPH2	protein_coding
ENSG00000064886	10.669	15.3535	0.524582	5.38555	28.2766	0.000143819	0.00239792	CHI3L2	protein_coding
ENSG00000287064	87.2177	107.984	0.307756	6.67683	28.2119	0.000145328	0.00242014	AL606500.1	lncRNA
ENSG00000156381	2.98672	4.52449	0.597724	4.48133	28.2039	0.000145515	0.00242035	ANKRD9	protein_coding
ENSG00000173011	5.02011	6.42255	0.355521	4.9086	28.1467	0.000146864	0.00243986	TADA2B	protein_coding
ENSG00000107372	22.4292	26.2535	0.227153	7.40082	28.1353	0.000147136	0.00244143	ZFAND5	protein_coding
ENSG00000064309	20.0413	15.4014	-0.379588	7.5634	28.0866	0.0001483	0.00245779	CDON	protein_coding
ENSG00000130584	1.48776	2.53873	0.767882	3.7419	28.0033	0.000150316	0.00248673	ZBTB46	protein_coding
ENSG00000106105	60.0234	50.9017	-0.237699	7.69971	27.9924	0.000150582	0.00248673	GARS1	protein_coding
ENSG00000137094	2.97234	3.98789	0.423862	4.55837	27.9922	0.000150585	0.00248673	DNAJB5	protein_coding
ENSG00000100678	2.04622	1.48947	-0.457849	4.08176	27.9605	0.000151362	0.00249658	SLC8A3	protein_coding
ENSG00000104886	7.95837	10.4992	0.398793	5.15377	27.9415	0.000151831	0.00250132	PLEKHJ1	protein_coding
ENSG00000130723	21.9436	27.1447	0.306718	8.09449	27.9186	0.000152396	0.00250764	PRRC2B	protein_coding
ENSG00000111266	2.2009	3.08364	0.486052	4.20486	27.8566	0.000153943	0.00252836	DUSP16	protein_coding
ENSG00000147912	10.4974	8.18071	-0.359165	5.82635	27.8534	0.000154021	0.00252836	FBXO10	protein_coding
ENSG00000237819	10.0779	5.79072	-0.797559	2.63045	27.7956	0.00015548	0.00254928	CDK6-AS1	lncRNA
ENSG00000152484	11.8331	14.4286	0.286	6.17236	27.7613	0.000156354	0.00256027	USP12	protein_coding
ENSG00000140319	114.472	135.991	0.248486	8.06732	27.7547	0.000156521	0.00256027	SRP14	protein_coding
ENSG00000187244	6.24426	10.1256	0.695787	5.09022	27.7469	0.000156722	0.00256027	BCAM	protein_coding
ENSG00000267278	0.51823	0.907823	0.809121	1.72839	27.7402	0.000156891	0.00256027	MAP3K14-AS1	lncRNA
ENSG00000004866	4.10883	5.25926	0.356094	4.86273	27.7259	0.000157258	0.00256323	ST7	protein_coding
ENSG00000275066	4.27535	5.1284	0.26252	6.14135	27.7008	0.000157905	0.00257075	SYNRG	protein_coding
ENSG00000114062	16.3618	13.9651	-0.228561	7.64253	27.6872	0.000158258	0.00257345	UBE3A	protein_coding
ENSG00000159063	14.3668	11.7577	-0.288795	5.62994	27.6677	0.000158761	0.00257861	ALG8	protein_coding
ENSG00000113407	47.5346	40.6276	-0.226528	8.07174	27.6369	0.000159566	0.00258332	TARS1	protein_coding
ENSG00000204217	3.91201	4.72764	0.273064	5.6199	27.6341	0.000159639	0.00258332	BMPR2	protein_coding
ENSG00000136040	0.976756	0.653828	-0.579745	3.38648	27.6335	0.000159653	0.00258332	PLXNC1	protein_coding
ENSG00000136237	0.552112	0.297043	-0.895075	2.7796	27.6279	0.000159799	0.00258332	RAPGEF5	protein_coding
ENSG00000143878	10.5027	15.4751	0.557989	4.8707	27.6018	0.000160485	0.00258875	RHOB	protein_coding
ENSG00000073060	12.515	9.85874	-0.344058	6.28706	27.5994	0.000160549	0.00258875	SCARB1	protein_coding
ENSG00000168092	22.6219	26.0383	0.202924	7.53518	27.5938	0.000160696	0.00258875	PAFAH1B2	protein_coding
ENSG00000107957	11.3224	13.9874	0.304717	7.08772	27.5759	0.000161168	0.00259211	SH3PXD2A	protein_coding
ENSG00000257727	12.4815	9.52157	-0.389795	5.17295	27.5528	0.000161781	0.00259211	CNPY2	protein_coding
ENSG00000159423	5.03582	6.85355	0.444025	4.19604	27.5516	0.000161812	0.00259211	ALDH4A1	protein_coding
ENSG00000254470	4.94749	6.18648	0.321897	5.12836	27.5491	0.000161877	0.00259211	AP5B1	protein_coding
ENSG00000100979	9.0074	6.86877	-0.391337	4.80463	27.5432	0.000162035	0.00259211	PLTP	protein_coding
ENSG00000143850	0.924874	0.610546	-0.598955	3.26972	27.5384	0.000162163	0.00259211	PLEKHA6	protein_coding
ENSG00000157593	26.3404	32.9176	0.321986	6.06326	27.5363	0.000162218	0.00259211	SLC35B2	protein_coding
ENSG00000004897	23.6583	20.1869	-0.228903	7.20365	27.5159	0.000162762	0.00259781	CDC27	protein_coding
ENSG00000168259	18.5481	15.6894	-0.241514	7.28486	27.5046	0.000163065	0.00259963	DNAJC7	protein_coding
ENSG00000125962	19.1655	15.038	-0.34963	6.46124	27.4937	0.000163357	0.00260129	ARMCX5	protein_coding
ENSG00000111912	0.683536	0.387958	-0.816276	2.05361	27.4183	0.000165396	0.00263073	NCOA7	protein_coding
ENSG00000149485	19.1327	16.2197	-0.23827	7.43689	27.3827	0.000166368	0.00264017	FADS1	protein_coding
ENSG00000196526	4.99454	6.27928	0.33028	5.67398	27.3826	0.000166371	0.00264017	AFAP1	protein_coding
ENSG00000131023	5.86722	4.43493	-0.403171	5.59464	27.3675	0.000166786	0.00264371	LATS1	protein_coding
ENSG00000089159	10.674	13.7059	0.36045	6.35984	27.3242	0.000167982	0.00265962	PXN	protein_coding
ENSG00000134086	39.45	47.1772	0.258091	7.35832	27.2943	0.000168814	0.00266712	VHL	protein_coding
ENSG00000083799	1.66659	1.24669	-0.418565	4.29299	27.2933	0.000168842	0.00266712	CYLD	protein_coding
ENSG00000148229	104.702	122.307	0.224221	8.13501	27.2812	0.000169178	0.00266938	POLE3	protein_coding
ENSG00000035681	10.3135	8.57601	-0.266033	5.76819	27.2342	0.000170501	0.00268718	NSMAF	protein_coding
ENSG00000160233	1.20253	1.95103	0.697449	2.97182	27.2089	0.000171214	0.00269272	LRRC3	protein_coding
ENSG00000176049	12.6994	10.6885	-0.24855	6.81927	27.208	0.000171241	0.00269272	JAKMIP2	protein_coding
ENSG00000179242	29.451	22.4898	-0.389249	7.70777	27.1863	0.000171858	0.00269714	CDH4	protein_coding
ENSG00000041982	29.6688	40.2557	0.440142	8.24484	27.1843	0.000171913	0.00269714	TNC	protein_coding
ENSG00000117691	20.6541	27.0876	0.391492	4.81306	27.1576	0.000172675	0.00270602	NENF	protein_coding
ENSG00000172081	2.16913	3.03933	0.487	3.46776	27.1174	0.000173831	0.00272105	MOB3A	protein_coding
ENSG00000151006	1.33172	0.814777	-0.708881	2.62923	27.05	0.00017579	0.0027486	PRSS53	protein_coding
ENSG00000103404	2.42131	3.08944	0.352035	4.86427	27.0061	0.000177076	0.00276347	USP31	protein_coding
ENSG00000125875	7.2443	9.06007	0.322961	5.56158	27.0039	0.000177141	0.00276347	TBC1D20	protein_coding
ENSG00000111424	0.41997	0.140211	-1.58336	1.73016	26.9881	0.000177607	0.00276763	VDR	polymorphic_pseudogene
ENSG00000117519	180.422	207.088	0.198887	8.9957	26.96	0.00017844	0.00277748	CNN3	protein_coding
ENSG00000226234	0.928492	0.302419	-1.60333	0.251077	26.9432	0.000178941	0.00278214	KRT18P24	processed_pseudogene
ENSG00000078114	0.216335	0.102416	-1.07605	1.16189	26.9328	0.000179252	0.00278384	NEBL	protein_coding
ENSG00000134030	4.20453	5.37912	0.354898	5.10404	26.879	0.000180869	0.0028058	CTIF	protein_coding
ENSG00000165312	4.25916	3.02365	-0.494621	4.16267	26.8416	0.000182003	0.00282023	OTUD1	protein_coding
ENSG00000123080	17.0851	21.9202	0.358972	5.75346	26.8128	0.000182882	0.00283068	CDKN2C	protein_coding
ENSG00000163710	3.49512	2.17187	-0.687289	3.48757	26.7934	0.000183475	0.00283161	PCOLCE2	protein_coding
ENSG00000177853	2.98719	2.3771	-0.329192	5.00012	26.7844	0.000183753	0.00283161	ZNF518A	protein_coding
ENSG00000116584	28.1637	23.8308	-0.241103	7.98688	26.7798	0.000183895	0.00283161	ARHGEF2	protein_coding
ENSG00000167646	0.92989	0.464679	-1.00176	1.61007	26.7779	0.000183951	0.00283161	DNAAF3	protein_coding
ENSG00000163348	17.0656	20.8797	0.291172	5.90083	26.7743	0.000184062	0.00283161	PYGO2	protein_coding
ENSG00000112033	7.04575	8.77909	0.317196	4.91187	26.7708	0.000184172	0.00283161	PPARD	protein_coding
ENSG00000165606	2.80307	1.77884	-0.653736	3.01895	26.7564	0.000184617	0.0028353	DRGX	protein_coding
ENSG00000168530	7.3926	14.3348	0.951401	3.90603	26.7488	0.00018485	0.00283573	MYL1	protein_coding
ENSG00000102225	14.9772	18.0566	0.269766	6.39453	26.7413	0.000185084	0.00283617	CDK16	protein_coding
ENSG00000206561	1.69957	0.984362	-0.785701	2.49411	26.7327	0.000185352	0.00283714	COLQ	protein_coding
ENSG00000164659	12.2652	10.0771	-0.28328	6.49949	26.7003	0.000186361	0.00284942	KIAA1324L	protein_coding
ENSG00000109819	1.05304	0.657515	-0.679681	3.23846	26.6759	0.000187125	0.00285794	PPARGC1A	protein_coding
ENSG00000180233	3.67538	5.01929	0.448876	3.98428	26.6603	0.000187618	0.00286101	ZNRF2	protein_coding
ENSG00000158186	13.3114	17.0072	0.353331	6.42803	26.6564	0.00018774	0.00286101	MRAS	protein_coding
ENSG00000186187	2.17126	2.9487	0.441798	4.51939	26.6339	0.000188452	0.0028687	ZNRF1	protein_coding
ENSG00000011105	27.2265	23.3276	-0.223081	7.41559	26.6116	0.000189159	0.0028763	TSPAN9	protein_coding
ENSG00000065802	9.68232	8.00336	-0.274645	5.98338	26.5781	0.000190227	0.00288704	ASB1	protein_coding
ENSG00000197217	12.7201	15.3447	0.270913	6.84452	26.5763	0.000190283	0.00288704	ENTPD4	protein_coding
ENSG00000182704	5.624	7.12353	0.340669	4.53395	26.5682	0.000190546	0.00288786	TSKU	protein_coding
ENSG00000211455	7.88489	9.50064	0.268897	5.67378	26.5107	0.000192401	0.00291277	STK38L	protein_coding
ENSG00000124789	15.5598	18.2063	0.226729	6.71632	26.4984	0.000192798	0.00291559	NUP153	protein_coding
ENSG00000185650	28.9886	37.3525	0.365355	7.35713	26.4804	0.000193386	0.0029213	ZFP36L1	protein_coding
ENSG00000112658	29.6683	35.0694	0.241238	6.7193	26.4709	0.000193695	0.00292199	SRF	protein_coding
ENSG00000183741	11.2201	13.7231	0.290078	6.5388	26.466	0.000193855	0.00292199	CBX6	protein_coding
ENSG00000141013	5.99085	4.71922	-0.344258	5.09307	26.4436	0.00019459	0.00292988	GAS8	protein_coding
ENSG00000135018	38.6218	33.7219	-0.195685	7.98551	26.4257	0.000195179	0.00293163	UBQLN1	protein_coding
ENSG00000196090	0.433765	0.202412	-1.09662	2.083	26.422	0.000195303	0.00293163	PTPRT	protein_coding
ENSG00000078725	13.8822	17.1385	0.30396	5.93002	26.4208	0.000195343	0.00293163	BRINP1	protein_coding
ENSG00000218336	3.66506	2.9017	-0.336745	5.17463	26.3139	0.00019891	0.00298193	TENM3	protein_coding
ENSG00000211459	1845.78	1420.43	-0.377885	10.5739	26.2934	0.000199601	0.00298904	MT-RNR1	Mt_rRNA
ENSG00000155115	81.629	65.3083	-0.321383	6.01362	26.2778	0.000200129	0.0029937	GTF3C6	protein_coding
ENSG00000132185	54.8593	41.3588	-0.407431	7.2943	26.2667	0.000200507	0.00299495	FCRLA	protein_coding
ENSG00000106236	15.6842	19.8811	0.342006	5.70966	26.2626	0.000200646	0.00299495	NPTX2	protein_coding
ENSG00000146592	4.29462	3.37641	-0.346465	5.63007	26.1776	0.000203567	0.00303528	CREB5	protein_coding
ENSG00000051620	0.436323	0.656177	0.588188	2.48699	26.168	0.000203899	0.00303695	HEBP2	protein_coding
ENSG00000184226	1.09445	0.783819	-0.480892	4.66675	26.1209	0.000205542	0.00305667	PCDH9	protein_coding
ENSG00000156860	7.31985	4.59584	-0.673016	5.55038	26.1173	0.000205665	0.00305667	FBRS	protein_coding
ENSG00000184575	57.56	49.2424	-0.225091	8.69069	26.1049	0.000206102	0.00305987	XPOT	protein_coding
ENSG00000189077	17.396	21.2887	0.291494	5.24215	26.0543	0.000207889	0.00308309	TMEM120A	protein_coding
ENSG00000134152	4.39548	5.44374	0.308383	5.20364	26.024	0.000208967	0.00309575	KATNBL1	protein_coding
ENSG00000158163	6.20863	7.76998	0.323063	5.01968	26.0056	0.000209624	0.00310217	DZIP1L	protein_coding
ENSG00000156970	39.2635	45.7159	0.21954	7.35496	25.9957	0.000209978	0.00310408	BUB1B	protein_coding
ENSG00000077232	6.49524	5.37792	-0.272419	7.09143	25.9517	0.000211567	0.00312423	DNAJC10	protein_coding
ENSG00000075785	87.0197	72.4433	-0.264305	7.73515	25.9362	0.000212129	0.0031285	RAB7A	protein_coding
ENSG00000196352	2.67271	1.80301	-0.566919	3.81826	25.9286	0.000212405	0.0031285	CD55	protein_coding
ENSG00000107537	5.6708	7.33288	0.370445	4.44195	25.925	0.000212535	0.0031285	PHYH	protein_coding
ENSG00000106003	6.6144	9.95386	0.587702	4.74524	25.8847	0.000214008	0.00314683	LFNG	protein_coding
ENSG00000164104	132.265	151.868	0.199351	8.39182	25.8631	0.000214804	0.00315518	HMGB2	protein_coding
ENSG00000139793	6.61636	5.15066	-0.361584	5.07463	25.814	0.000216619	0.00317846	MBNL2	protein_coding
ENSG00000100938	15.8857	12.6501	-0.32827	5.6522	25.8065	0.000216902	0.00317923	GMPR2	protein_coding
ENSG00000180720	0.672784	1.52815	1.17833	0.548011	25.7619	0.000218571	0.0032003	CHRM4	protein_coding
ENSG00000013275	44.7606	36.9588	-0.276111	6.79336	25.7033	0.000220787	0.00322806	PSMC4	protein_coding
ENSG00000124067	3.79456	4.80124	0.338979	5.16871	25.6994	0.000220934	0.00322806	SLC12A4	protein_coding
ENSG00000108932	1.93697	1.17073	-0.727037	2.51544	25.6917	0.000221228	0.00322895	SLC16A6	protein_coding
ENSG00000139372	25.3932	29.5373	0.218148	7.02717	25.6208	0.000223949	0.00326522	TDG	protein_coding
ENSG00000155957	10.4099	8.24642	-0.335655	5.2641	25.5788	0.000225582	0.00328556	TMBIM4	protein_coding
ENSG00000175054	2.40697	2.00623	-0.262551	5.99147	25.5409	0.000227065	0.00330367	ATR	protein_coding
ENSG00000115107	3.12381	4.69333	0.585925	4.14255	25.4995	0.000228699	0.00332115	STEAP3	protein_coding
ENSG00000130147	8.2255	6.87356	-0.259039	5.7736	25.4983	0.000228747	0.00332115	SH3BP4	protein_coding
ENSG00000172493	3.07646	2.28791	-0.426466	4.71053	25.4878	0.000229161	0.00332368	AFF1	protein_coding
ENSG00000138185	0.245502	0.0987201	-1.3088	1.7798	25.4761	0.000229629	0.00332697	ENTPD1	protein_coding
ENSG00000118523	4.03997	2.69836	-0.581537	4.14169	25.469	0.000229909	0.00332754	CCN2	protein_coding
ENSG00000160325	2.09283	3.02194	0.528895	2.9713	25.456	0.000230429	0.00333158	CACFD1	protein_coding
ENSG00000145332	6.93246	5.48539	-0.337482	5.46702	25.4305	0.000231451	0.00334287	KLHL8	protein_coding
ENSG00000117707	7.34352	5.92785	-0.308619	5.82903	25.3824	0.000233394	0.00336741	PROX1	protein_coding
ENSG00000133030	23.476	27.0035	0.201959	8.68982	25.2916	0.000237111	0.00341567	MPRIP	protein_coding
ENSG00000092208	14.0118	10.9945	-0.34986	5.25095	25.2886	0.000237234	0.00341567	GEMIN2	protein_coding
ENSG00000143158	10.6893	13.3443	0.320066	4.60672	25.2618	0.000238347	0.00342812	MPC2	protein_coding
ENSG00000156313	1.8198	1.33182	-0.450632	3.73699	25.234	0.000239505	0.00344121	RPGR	protein_coding
ENSG00000088256	13.8573	19.8728	0.5193	6.42178	25.2226	0.000239982	0.00344447	GNA11	protein_coding
ENSG00000184402	14.6476	17.5451	0.260428	6.36537	25.1875	0.000241456	0.00346204	SS18L1	protein_coding
ENSG00000006432	0.716398	1.04121	0.539319	3.50385	25.1337	0.00024374	0.00349116	MAP3K9	protein_coding
ENSG00000149743	8.8578	6.60001	-0.42447	4.42201	25.1196	0.000244343	0.00349618	TRPT1	protein_coding
ENSG00000168005	26.1902	32.1051	0.293345	6.33134	25.1058	0.000244935	0.00350102	SPINDOC	protein_coding
ENSG00000124380	17.1885	20.9928	0.288241	5.20158	25.0691	0.000246515	0.00351997	SNRNP27	protein_coding
ENSG00000142188	5.26007	6.7064	0.35036	4.75234	25.006	0.00024926	0.00355341	TMEM50B	protein_coding
ENSG00000118965	5.45688	4.46037	-0.290901	5.39679	25.0017	0.000249447	0.00355341	WDR35	protein_coding
ENSG00000144455	7.51471	6.1849	-0.280668	5.82248	24.9975	0.000249628	0.00355341	SUMF1	protein_coding
ENSG00000185127	23.6315	19.8857	-0.248927	6.07773	24.9862	0.000250127	0.00355685	C6orf120	protein_coding
ENSG00000150457	5.16929	6.56088	0.344487	5.25064	24.9739	0.000250668	0.00356088	LATS2	protein_coding
ENSG00000143390	10.4753	8.63341	-0.278883	5.6378	24.9677	0.000250941	0.00356109	RFX5	protein_coding
ENSG00000143226	0.236098	0.03998	-2.5278	0.479751	24.9585	0.000251346	0.00356318	FCGR2A	protein_coding
ENSG00000124795	34.0792	29.3827	-0.21386	7.88028	24.9516	0.000251651	0.00356385	DEK	protein_coding
ENSG00000198523	7.98842	4.92467	-0.696612	4.44991	24.9438	0.000251996	0.00356508	PLN	protein_coding
ENSG00000117020	5.61466	6.74352	0.264359	6.21944	24.9013	0.000253891	0.00358822	AKT3	protein_coding
ENSG00000196369	1.28301	0.888129	-0.529578	3.14784	24.8855	0.000254599	0.00359455	SRGAP2B	protein_coding
ENSG00000118242	2.11953	1.42473	-0.573157	3.14244	24.8718	0.000255211	0.00359952	MREG	protein_coding
ENSG00000275832	6.72379	9.07563	0.431804	5.74597	24.8509	0.000256155	0.00360915	ARHGAP23	protein_coding
ENSG00000176623	10.0325	8.2584	-0.280862	5.72703	24.8099	0.000258017	0.00362827	RMDN1	protein_coding
ENSG00000158480	4.74052	6.23007	0.394937	4.4856	24.7966	0.000258625	0.00362827	SPATA2	protein_coding
ENSG00000159840	28.9355	23.1171	-0.324117	6.4164	24.7964	0.000258632	0.00362827	ZYX	protein_coding
ENSG00000196935	2.10461	1.59836	-0.396474	5.58723	24.7925	0.000258812	0.00362827	SRGAP1	protein_coding
ENSG00000103356	12.9639	10.6384	-0.285201	6.09532	24.7922	0.000258824	0.00362827	EARS2	protein_coding
ENSG00000161813	14.2304	11.8109	-0.268786	6.70569	24.7566	0.000260455	0.00364724	LARP4	protein_coding
ENSG00000103485	26.244	31.1019	0.244737	6.60397	24.7512	0.000260705	0.00364724	QPRT	protein_coding
ENSG00000055211	27.5683	32.8901	0.254664	5.98733	24.7335	0.000261523	0.00365476	GINM1	protein_coding
ENSG00000113742	2.92927	2.3029	-0.346655	5.14313	24.7281	0.000261772	0.00365476	CPEB4	protein_coding
ENSG00000161642	19.1878	15.0299	-0.352775	6.21859	24.7223	0.000262042	0.00365484	ZNF385A	protein_coding
ENSG00000170276	9.59787	4.27623	-1.16073	2.63329	24.6398	0.000265902	0.00370494	HSPB2	protein_coding
ENSG00000205133	4.08602	3.11101	-0.393823	4.71102	24.6007	0.000267753	0.00372697	TRIQK	protein_coding
ENSG00000103047	3.39252	4.37515	0.366951	4.60389	24.5904	0.000268243	0.00373004	TANGO6	protein_coding
ENSG00000115457	62.3977	48.1132	-0.375211	8.29303	24.5798	0.000268748	0.0037333	IGFBP2	protein_coding
ENSG00000198855	1.28959	1.89174	0.553215	2.68509	24.5457	0.000270384	0.00375023	FICD	protein_coding
ENSG00000182934	33.6756	28.5068	-0.240213	7.00857	24.5403	0.000270642	0.00375023	SRPRA	protein_coding
ENSG00000182459	4.01543	2.65816	-0.595585	3.09622	24.5375	0.00027078	0.00375023	TEX19	protein_coding
ENSG00000198856	179.169	154.532	-0.213356	8.23757	24.4959	0.000272794	0.00377433	OSTC	protein_coding
ENSG00000125520	37.3996	48.23	0.366491	6.78845	24.4804	0.000273547	0.00378097	SLC2A4RG	protein_coding
ENSG00000134109	11.338	9.2367	-0.295454	6.39232	24.4501	0.000275028	0.00379083	EDEM1	protein_coding
ENSG00000162783	9.4312	12.1784	0.36795	5.49822	24.4491	0.000275075	0.00379083	IER5	protein_coding
ENSG00000166741	3.72848	2.04096	-0.871247	4.22226	24.449	0.000275084	0.00379083	NNMT	protein_coding
ENSG00000154640	19.404	24.5131	0.337274	5.57388	24.4179	0.000276612	0.00380777	BTG3	protein_coding
ENSG00000146112	22.7062	26.8761	0.243036	6.84226	24.4107	0.000276967	0.00380777	PPP1R18	protein_coding
ENSG00000141380	37.2044	31.8694	-0.223254	7.56654	24.4072	0.000277139	0.00380777	SS18	protein_coding
ENSG00000125430	1.67899	1.00274	-0.743776	3.10071	24.3994	0.000277529	0.00380924	HS3ST3B1	protein_coding
ENSG00000127334	11.4233	9.35628	-0.287709	6.6993	24.394	0.000277797	0.00380924	DYRK2	protein_coding
ENSG00000167904	2.01264	1.5002	-0.423633	4.09681	24.3712	0.000278929	0.00382096	TMEM68	protein_coding
ENSG00000141279	11.1837	12.9463	0.211104	7.09835	24.3253	0.000281229	0.00384866	NPEPPS	protein_coding
ENSG00000106086	5.07765	6.104	0.265685	5.83215	24.3102	0.000281992	0.00385528	PLEKHA8	protein_coding
ENSG00000100523	3.48355	2.7912	-0.31927	5.8216	24.2709	0.000283982	0.00387578	DDHD1	protein_coding
ENSG00000152944	13.6372	16.7681	0.298424	5.71409	24.2695	0.000284052	0.00387578	MED21	protein_coding
ENSG00000156471	24.6915	20.5378	-0.26546	7.14426	24.1889	0.000288191	0.00392838	PTDSS1	protein_coding
ENSG00000112559	82.8236	62.6273	-0.403529	7.82716	24.1834	0.000288479	0.00392844	MDFI	protein_coding
ENSG00000101152	28.3576	33.8991	0.257285	7.1667	24.1483	0.000290305	0.00394739	DNAJC5	protein_coding
ENSG00000158164	95.0457	119.77	0.333646	6.04945	24.1456	0.000290442	0.00394739	TMSB15A	protein_coding
ENSG00000137168	50.4874	41.0541	-0.29815	6.12415	24.1373	0.000290878	0.00394943	PPIL1	protein_coding
ENSG00000129521	0.812807	0.495412	-0.714121	2.676	24.125	0.000291523	0.0039543	EGLN3	protein_coding
ENSG00000169814	2.14881	1.68932	-0.346266	5.39894	24.1123	0.00029219	0.00395946	BTD	protein_coding
ENSG00000138279	28.5644	23.9936	-0.251286	6.37724	24.0492	0.000295531	0.00400081	ANXA7	protein_coding
ENSG00000107815	15.5444	12.3226	-0.334652	5.94636	24.0283	0.000296648	0.00401052	TWNK	protein_coding
ENSG00000137713	10.8499	12.8408	0.243168	6.38433	24.025	0.000296828	0.00401052	PPP2R1B	protein_coding
ENSG00000139880	2.37572	3.48801	0.552385	3.37462	23.9764	0.000299441	0.00404187	CDH24	protein_coding
ENSG00000136826	3.75427	2.76149	-0.44386	3.75466	23.958	0.000300442	0.00405143	KLF4	protein_coding
ENSG00000166860	7.29808	9.16169	0.328674	5.69131	23.9092	0.000303108	0.00408339	ZBTB39	protein_coding
ENSG00000158457	18.7714	23.9323	0.35061	6.02895	23.8845	0.000304467	0.0040977	TSPAN33	protein_coding
ENSG00000198689	4.93204	6.0249	0.288858	5.53266	23.8768	0.000304891	0.00409941	SLC9A6	protein_coding
ENSG00000145725	3.80885	3.11153	-0.291586	5.87507	23.8663	0.000305469	0.00410321	PPIP5K2	protein_coding
ENSG00000145220	20.1457	16.6498	-0.274897	5.48483	23.8489	0.000306435	0.00411058	LYAR	protein_coding
ENSG00000178035	76.1668	64.1981	-0.246477	7.56155	23.8457	0.000306613	0.00411058	IMPDH2	protein_coding
ENSG00000115758	324.393	370.41	0.191384	9.84084	23.8018	0.000309071	0.00413748	ODC1	protein_coding
ENSG00000107679	1.09392	0.849329	-0.364892	4.72378	23.797	0.000309336	0.00413748	PLEKHA1	protein_coding
ENSG00000224361	5.80616	2.92666	-0.987625	1.36358	23.7938	0.000309518	0.00413748	AC011239.1	lncRNA
ENSG00000125871	19.8192	16.3769	-0.275297	5.46551	23.7854	0.000309993	0.00413983	MGME1	protein_coding
ENSG00000101400	8.17558	11.1207	0.443038	4.05209	23.7646	0.000311165	0.00415146	SNTA1	protein_coding
ENSG00000101353	1.17766	0.680807	-0.789981	1.71486	23.7415	0.000312477	0.00416495	MROH8	protein_coding
ENSG00000155097	15.0977	12.6112	-0.259308	6.39707	23.7238	0.000313483	0.00417434	ATP6V1C1	protein_coding
ENSG00000162975	0.278681	0.744887	1.41035	-0.100163	23.7146	0.00031401	0.00417733	KCNF1	protein_coding
ENSG00000132780	74.1943	85.1242	0.198265	9.31772	23.698	0.00031496	0.00418593	NASP	protein_coding
ENSG00000185608	16.9463	13.5501	-0.322331	4.98086	23.6898	0.000315433	0.00418819	MRPL40	protein_coding
ENSG00000205084	3.29361	2.32772	-0.499556	4.00467	23.6844	0.000315745	0.00418832	TMEM231	protein_coding
ENSG00000185904	3.62481	2.93521	-0.304377	4.93323	23.6491	0.000317782	0.0042113	LINC00839	lncRNA
ENSG00000157404	1.39275	2.10413	0.594405	2.92104	23.6402	0.000318297	0.00421408	KIT	protein_coding
ENSG00000159228	11.6119	8.77531	-0.404734	4.70261	23.6349	0.000318604	0.00421411	CBR1	protein_coding
ENSG00000167074	3.24636	4.2999	0.405596	3.87675	23.6259	0.000319129	0.00421702	TEF	protein_coding
ENSG00000170776	3.96914	4.76214	0.262976	6.45998	23.6079	0.00032018	0.00422686	AKAP13	protein_coding
ENSG00000183283	27.7724	32.0435	0.206447	7.60729	23.5943	0.000320977	0.00422981	DAZAP2	protein_coding
ENSG00000116198	15.4917	13.0341	-0.248965	6.79635	23.5937	0.000321015	0.00422981	CEP104	protein_coding
ENSG00000146054	1.90328	1.33616	-0.510944	3.66471	23.5807	0.000321779	0.00423583	TRIM7	protein_coding
ENSG00000106603	5.57911	6.622	0.247307	6.11181	23.5688	0.000322476	0.00424098	COA1	protein_coding
ENSG00000064300	31.1513	19.9204	-0.645719	7.51941	23.5581	0.000323111	0.00424529	NGFR	protein_coding
ENSG00000123395	14.0291	16.7779	0.257864	5.71461	23.518	0.000325487	0.00427245	ATG101	protein_coding
ENSG00000110583	11.3345	13.542	0.256818	6.00032	23.4772	0.000327931	0.00430044	NAA40	protein_coding
ENSG00000210082	7257.28	5762.57	-0.332714	13.3719	23.4663	0.000328588	0.00430493	MT-RNR2	Mt_rRNA
ENSG00000179431	4.8244	6.77295	0.488281	3.91793	23.4612	0.000328897	0.00430493	FJX1	protein_coding
ENSG00000168216	3.27572	4.05962	0.308914	5.25215	23.4338	0.000330555	0.00432255	LMBRD1	protein_coding
ENSG00000178922	8.27787	6.11158	-0.436638	4.58542	23.4248	0.0003311	0.00432558	HYI	protein_coding
ENSG00000166974	8.35378	6.75883	-0.30534	5.45447	23.4136	0.000331779	0.00432959	MAPRE2	protein_coding
ENSG00000184205	4.53198	3.62022	-0.324029	4.59626	23.4081	0.000332115	0.00432959	TSPYL2	protein_coding
ENSG00000049245	36.4093	42.7046	0.230109	6.55199	23.4044	0.000332346	0.00432959	VAMP3	protein_coding
ENSG00000187514	249.583	212.953	-0.228976	9.79803	23.3882	0.000333335	0.00433838	PTMA	protein_coding
ENSG00000053254	8.06264	9.74916	0.274285	6.34609	23.3186	0.000337631	0.00439015	FOXN3	protein_coding
ENSG00000106012	4.41483	5.36108	0.2803	5.3036	23.3085	0.000338262	0.00439423	IQCE	protein_coding
ENSG00000278259	6.99165	5.84156	-0.258959	6.29332	23.2507	0.000341887	0.00443352	MYO19	protein_coding
ENSG00000124766	6.93392	9.01952	0.378394	5.17451	23.25	0.000341928	0.00443352	SOX4	protein_coding
ENSG00000117362	46.5333	53.2979	0.195907	7.37518	23.2441	0.000342299	0.00443417	APH1A	protein_coding
ENSG00000090889	19.7564	22.8203	0.207916	6.53369	23.2312	0.00034312	0.004439	KIF4A	protein_coding
ENSG00000221955	0.463855	0.222447	-1.05964	1.38221	23.2281	0.000343315	0.004439	SLC12A8	protein_coding
ENSG00000116095	1.21837	1.55339	0.350689	4.28461	23.2181	0.000343952	0.00444309	PLEKHA3	protein_coding
ENSG00000182199	59.9178	51.3244	-0.223234	7.9533	23.1714	0.000346931	0.00447738	SHMT2	protein_coding
ENSG00000097007	12.5411	15.9157	0.343351	6.61961	23.132	0.00034947	0.00450535	ABL1	protein_coding
ENSG00000166123	10.0696	8.28981	-0.280426	5.96353	23.1277	0.00034975	0.00450535	GPT2	protein_coding
ENSG00000244005	3.23208	4.29899	0.411481	4.33229	23.1206	0.000350207	0.00450704	NFS1	protein_coding
ENSG00000171004	31.4434	27.194	-0.209561	7.42067	23.1114	0.000350809	0.00451059	HS6ST2	protein_coding
ENSG00000156650	1.31821	1.05401	-0.322175	5.28002	23.0877	0.000352355	0.00452625	KAT6B	protein_coding
ENSG00000076248	39.2472	47.0164	0.260598	6.93016	23.0584	0.000354271	0.00454664	UNG	protein_coding
ENSG00000145016	2.16958	2.97921	0.45797	4.78643	23.0454	0.000355125	0.00455338	RUBCN	protein_coding
ENSG00000141504	9.78738	13.0933	0.419472	4.17851	23.0308	0.00035609	0.00456151	SAT2	protein_coding
ENSG00000166902	28.7682	23.5603	-0.28774	5.93523	23.0253	0.000356456	0.00456198	MRPL16	protein_coding
ENSG00000115484	110.267	96.9817	-0.185234	8.1995	23.0001	0.000358132	0.00457533	CCT4	protein_coding
ENSG00000006712	27.8856	23.1023	-0.271669	6.20015	22.9996	0.000358162	0.00457533	PAF1	protein_coding
ENSG00000135709	1.1214	1.59895	0.510152	3.44808	22.9812	0.000359389	0.00458677	KIAA0513	protein_coding
ENSG00000163485	0.356504	0.754313	1.07458	1.62427	22.9667	0.000360359	0.00459491	ADORA1	protein_coding
ENSG00000188916	1.53924	0.978484	-0.653456	2.85874	22.8657	0.000367213	0.00467799	INSYN2A	protein_coding
ENSG00000166598	311.62	269.929	-0.20722	10.6063	22.8479	0.000368433	0.00468921	HSP90B1	protein_coding
ENSG00000102054	33.0206	28.9095	-0.191821	7.88711	22.8114	0.000370954	0.00471695	RBBP7	protein_coding
ENSG00000127314	10.7023	9.28061	-0.205511	7.41587	22.7858	0.000372734	0.00473278	RAP1B	protein_coding
ENSG00000115084	5.91427	4.9973	-0.242945	6.19452	22.7837	0.000372883	0.00473278	SLC35F5	protein_coding
ENSG00000119547	0.410587	0.594415	0.534211	2.75977	22.7575	0.000374716	0.00475168	ONECUT2	protein_coding
ENSG00000173064	2.00401	2.45965	0.296076	5.46986	22.7426	0.000375763	0.00476059	HECTD4	protein_coding
ENSG00000110237	6.81543	9.01905	0.403786	6.22822	22.728	0.000376787	0.00476918	ARHGEF17	protein_coding
ENSG00000232677	5.69512	4.61568	-0.302819	5.70882	22.721	0.000377288	0.00477115	LINC00665	lncRNA
ENSG00000170473	8.57491	10.7358	0.324622	4.61764	22.6746	0.000380586	0.00480847	PYM1	protein_coding
ENSG00000170832	6.04491	4.97892	-0.279613	5.86401	22.6474	0.000382529	0.0048286	USP32	protein_coding
ENSG00000151883	1.06264	0.743763	-0.515139	3.04674	22.6178	0.000384667	0.00485116	PARP8	protein_coding
ENSG00000187239	6.4886	7.75237	0.25662	5.53298	22.6116	0.000385117	0.0048524	FNBP1	protein_coding
ENSG00000196305	40.3614	34.9737	-0.20661	8.06576	22.6058	0.000385536	0.00485326	IARS1	protein_coding
ENSG00000214413	4.00224	3.09275	-0.3712	5.01732	22.58	0.000387413	0.00487246	BBIP1	protein_coding
ENSG00000004478	49.901	42.4551	-0.233015	7.84031	22.573	0.000387919	0.00487438	FKBP4	protein_coding
ENSG00000109586	12.8087	10.8594	-0.238187	6.52831	22.5495	0.000389646	0.00489164	GALNT7	protein_coding
ENSG00000150867	6.45167	8.04438	0.318288	5.02788	22.5222	0.00039165	0.0049117	PIP4K2A	protein_coding
ENSG00000196218	13.5969	15.6142	0.199572	7.84884	22.5181	0.000391955	0.0049117	RYR1	protein_coding
ENSG00000147133	3.33125	2.71177	-0.296865	5.25657	22.5126	0.000392365	0.00491238	TAF1	protein_coding
ENSG00000141560	19.6585	23.5428	0.260199	5.94789	22.4718	0.000395393	0.00494581	FN3KRP	protein_coding
ENSG00000130559	15.8313	18.6116	0.233346	7.19347	22.4509	0.000396957	0.00496088	CAMSAP1	protein_coding
ENSG00000169635	6.8448	9.10399	0.410773	5.72836	22.4081	0.000400185	0.00499671	HIC2	protein_coding
ENSG00000125352	18.9004	14.5135	-0.380935	4.56931	22.3985	0.000400916	0.00500071	RNF113A	protein_coding
ENSG00000058866	0.410173	0.256538	-0.676853	2.04044	22.3908	0.000401495	0.00500071	DGKG	protein_coding
ENSG00000197006	14.0382	16.4364	0.227465	6.70346	22.3885	0.000401676	0.00500071	METTL9	protein_coding
ENSG00000166938	6.08659	4.49694	-0.435829	4.88701	22.3835	0.000402049	0.00500071	DIS3L	protein_coding
ENSG00000026652	1.77826	1.28626	-0.466294	4.35953	22.3801	0.000402315	0.00500071	AGPAT4	protein_coding
ENSG00000131725	5.54698	4.19484	-0.40372	4.58167	22.363	0.000403617	0.00501239	WDR44	protein_coding
ENSG00000152291	36.8527	31.3697	-0.232327	8.12662	22.3266	0.000406409	0.00504253	TGOLN2	protein_coding
ENSG00000111237	18.7017	22.4551	0.263694	5.82952	22.2957	0.0004088	0.00506765	VPS29	protein_coding
ENSG00000163714	31.5464	27.6943	-0.187886	8.48794	22.2757	0.000410359	0.00508242	U2SURP	protein_coding
ENSG00000139668	3.69814	2.93383	-0.333405	5.68973	22.2373	0.000413363	0.00511505	WDFY2	protein_coding
ENSG00000099365	0.937317	0.562928	-0.733251	2.05621	22.201	0.000416231	0.00514238	STX1B	protein_coding
ENSG00000170035	32.9887	39.6723	0.266186	6.70775	22.1999	0.000416316	0.00514238	UBE2E3	protein_coding
ENSG00000164096	18.144	22.45	0.30677	5.79817	22.1803	0.000417874	0.00515701	C4orf3	protein_coding
ENSG00000123124	8.64883	7.20121	-0.264131	5.74457	22.1604	0.000419463	0.00517201	WWP1	protein_coding
ENSG00000183873	1.68702	0.94833	-0.832924	4.79726	22.1168	0.000422962	0.0052105	SCN5A	protein_coding
ENSG00000080561	0.232417	0.056267	-2.01045	0.508034	22.0847	0.000425559	0.00523783	MID2	protein_coding
ENSG00000196547	4.07139	4.98393	0.291824	5.22475	22.0793	0.000426004	0.00523863	MAN2A2	protein_coding
ENSG00000144642	0.480131	0.678798	0.499542	3.18205	22.0076	0.000431886	0.00530625	RBMS3	protein_coding
ENSG00000197479	0.768724	1.22338	0.668446	2.03574	21.9617	0.000435704	0.0053484	PCDHB11	protein_coding
ENSG00000196811	13.8778	11.2973	-0.296835	5.62573	21.9049	0.000440473	0.00540214	CHRNG	protein_coding
ENSG00000074319	23.5518	20.0829	-0.229797	6.3758	21.8849	0.000442168	0.00541415	TSG101	protein_coding
ENSG00000131943	6.13141	7.48263	0.287225	5.1498	21.8842	0.000442236	0.00541415	C19orf12	protein_coding
ENSG00000137714	6.73767	8.84496	0.393307	4.42417	21.8763	0.000442904	0.00541754	FDX1	protein_coding
ENSG00000170703	0.458574	0.182709	-1.32254	0.944821	21.8654	0.000443834	0.00542411	TTLL6	protein_coding
ENSG00000245694	1.92096	2.36078	0.297436	4.79544	21.8489	0.000445241	0.00543186	CRNDE	lncRNA
ENSG00000105968	52.2815	59.8946	0.196177	7.96917	21.8467	0.000445435	0.00543186	H2AZ2	protein_coding
ENSG00000181409	2.09055	1.32893	-0.655381	4.56888	21.8441	0.000445655	0.00543186	AATK	protein_coding
ENSG00000136720	3.43638	4.76544	0.470837	4.28685	21.8396	0.00044604	0.00543186	HS6ST1	protein_coding
ENSG00000008853	7.38503	8.80568	0.253644	5.61313	21.8224	0.000447523	0.00544512	RHOBTB2	protein_coding
ENSG00000091622	12.7913	14.9476	0.224609	6.86447	21.7793	0.000451253	0.00548568	PITPNM3	protein_coding
ENSG00000136874	3.1912	4.01068	0.33025	4.97729	21.7548	0.000453391	0.00550683	STX17	protein_coding
ENSG00000171992	0.244633	0.485587	0.986839	1.86639	21.7486	0.000453931	0.00550854	SYNPO	protein_coding
ENSG00000164073	1.0101	0.724652	-0.479143	3.2698	21.731	0.000455478	0.00552247	MFSD8	protein_coding
ENSG00000112029	36.2079	41.7203	0.204375	7.16284	21.6944	0.000458712	0.00555386	FBXO5	protein_coding
ENSG00000186130	6.14685	7.742	0.3328	4.89008	21.6926	0.000458871	0.00555386	ZBTB6	protein_coding
ENSG00000183496	7.95455	10.9901	0.465357	5.14343	21.6837	0.000459657	0.00555852	MEX3B	protein_coding
ENSG00000166086	67.788	58.5252	-0.211872	8.3027	21.6422	0.000463365	0.00559739	JAM3	protein_coding
ENSG00000099814	4.40482	6.77222	0.618767	5.15337	21.6387	0.000463682	0.00559739	CEP170B	protein_coding
ENSG00000130340	27.7763	23.015	-0.271207	6.96518	21.6247	0.000464945	0.00560774	SNX9	protein_coding
ENSG00000011295	19.8042	16.8044	-0.236926	6.76671	21.5806	0.000468931	0.00564113	TTC19	protein_coding
ENSG00000068394	9.08248	11.9868	0.399543	4.02518	21.5806	0.000468936	0.00564113	GPKOW	protein_coding
ENSG00000177556	3.58043	4.55531	0.347745	4.29389	21.5805	0.000468938	0.00564113	ATOX1	protein_coding
ENSG00000235109	0.871553	1.33496	0.616916	2.71847	21.5624	0.000470593	0.00565454	ZSCAN31	protein_coding
ENSG00000147573	15.2113	18.2355	0.261657	5.66806	21.5593	0.000470871	0.00565454	TRIM55	protein_coding
ENSG00000179262	31.9872	26.7892	-0.255543	6.11481	21.55	0.000471724	0.00565627	RAD23A	protein_coding
ENSG00000184887	35.5022	41.8138	0.236343	6.37982	21.5488	0.000471833	0.00565627	BTBD6	protein_coding
ENSG00000110871	15.4199	12.579	-0.29371	5.29451	21.5082	0.000475576	0.00569619	COQ5	protein_coding
ENSG00000105559	15.8117	10.0147	-0.659409	5.54502	21.4703	0.000479088	0.00573329	PLEKHA4	protein_coding
ENSG00000108947	4.00339	2.86586	-0.481261	3.51491	21.4543	0.000480583	0.00574621	EFNB3	protein_coding
ENSG00000167930	9.58331	12.2842	0.357698	5.89001	21.4278	0.000483074	0.005771	FAM234A	protein_coding
ENSG00000105926	5.1412	4.22224	-0.283784	5.46856	21.3616	0.000489351	0.00584094	MPP6	protein_coding
ENSG00000100417	3.10422	4.38749	0.500803	3.98671	21.3406	0.000491368	0.00585996	PMM1	protein_coding
ENSG00000168280	8.10816	6.18055	-0.391081	6.04691	21.3216	0.000493192	0.00587431	KIF5C	protein_coding
ENSG00000139914	40.9277	51.5353	0.331986	5.81241	21.3192	0.000493421	0.00587431	FITM1	protein_coding
ENSG00000138092	19.0967	22.4496	0.233529	6.71475	21.3139	0.000493937	0.00587539	CENPO	protein_coding
ENSG00000251022	16.7588	19.665	0.230688	6.38489	21.2856	0.000496682	0.00590296	THAP9-AS1	lncRNA
ENSG00000106305	42.3168	36.3994	-0.217145	6.21856	21.2722	0.000497986	0.00591336	AIMP2	protein_coding
ENSG00000105514	1.53862	2.33455	0.599228	2.84423	21.2662	0.000498567	0.00591518	RAB3D	protein_coding
ENSG00000216775	1.93976	2.7169	0.485667	2.97716	21.2557	0.000499593	0.00592227	AL109918.1	transcribed_unprocessed_pseudogene
ENSG00000134909	2.06555	2.60143	0.333048	4.71808	21.2438	0.000500766	0.00592981	ARHGAP32	protein_coding
ENSG00000179933	24.3689	20.3957	-0.25689	6.18428	21.2405	0.000501086	0.00592981	C14orf119	protein_coding
ENSG00000144524	8.28521	10.0298	0.275839	5.6696	21.2331	0.000501819	0.0059334	COPS7B	protein_coding
ENSG00000250334	0.70692	0.389717	-0.859796	1.79593	21.223	0.000502812	0.00594005	LINC00989	lncRNA
ENSG00000134278	6.56304	7.94259	0.275514	5.50335	21.2147	0.00050363	0.00594464	SPIRE1	protein_coding
ENSG00000100934	21.93	18.7877	-0.223136	7.46414	21.208	0.000504287	0.00594732	SEC23A	protein_coding
ENSG00000169826	10.397	8.30273	-0.324316	5.15677	21.1874	0.000506332	0.00595583	CSGALNACT2	protein_coding
ENSG00000109466	3.11418	2.28686	-0.445612	3.38172	21.1856	0.000506518	0.00595583	KLHL2	protein_coding
ENSG00000168517	2.38223	1.50417	-0.66428	2.35479	21.1842	0.000506657	0.00595583	HEXIM2	protein_coding
ENSG00000140280	2.3261	1.47026	-0.660868	1.86006	21.1834	0.000506732	0.00595583	LYSMD2	protein_coding
ENSG00000113721	0.236216	0.43565	0.881216	1.59939	21.1758	0.000507493	0.00595659	PDGFRB	protein_coding
ENSG00000283196	7.31698	5.3928	-0.439203	3.98817	21.1741	0.000507659	0.00595659	AC006453.3	transcribed_unprocessed_pseudogene
ENSG00000002919	9.49607	11.8878	0.324233	5.13412	21.1655	0.000508514	0.00596016	SNX11	protein_coding
ENSG00000163380	5.64121	8.36499	0.566457	4.53472	21.1624	0.000508825	0.00596016	LMOD3	protein_coding
ENSG00000244055	1.31742	0.872531	-0.593148	2.90384	21.1035	0.00051476	0.0060209	AC007566.1	lncRNA
ENSG00000090534	0.525632	0.968609	0.878912	1.05141	21.1023	0.000514883	0.0060209	THPO	protein_coding
ENSG00000135250	23.7592	20.4352	-0.217296	7.19379	21.0831	0.000516831	0.00603381	SRPK2	protein_coding
ENSG00000169057	4.21088	4.89283	0.216677	6.3222	21.0828	0.000516859	0.00603381	MECP2	protein_coding
ENSG00000120656	11.1018	13.8752	0.322021	4.82246	21.0608	0.000519107	0.00605493	TAF12	protein_coding
ENSG00000176697	1.03621	0.657454	-0.655071	3.07475	21.0564	0.000519558	0.00605508	BDNF	protein_coding
ENSG00000114978	23.6687	27.0922	0.194976	7.4172	21.0457	0.000520656	0.00606277	MOB1A	protein_coding
ENSG00000162384	8.23785	6.57641	-0.324437	5.11376	21.0028	0.000525078	0.00610539	CZIB	protein_coding
ENSG00000168792	4.59701	6.13618	0.415582	4.18664	20.9994	0.000525434	0.00610539	ABHD15	protein_coding
ENSG00000167693	8.97882	11.1487	0.311844	5.82092	20.994	0.000525991	0.00610539	NXN	protein_coding
ENSG00000176597	0.541295	0.307942	-0.81218	2.21855	20.9931	0.000526083	0.00610539	B3GNT5	protein_coding
ENSG00000146281	15.1945	12.0893	-0.329574	5.82535	20.986	0.000526823	0.00610885	PM20D2	protein_coding
ENSG00000159259	3.52918	4.56081	0.369688	4.18982	20.9714	0.000528352	0.00611041	CHAF1B	protein_coding
ENSG00000100219	19.2535	15.6825	-0.29584	5.72335	20.9706	0.000528431	0.00611041	XBP1	protein_coding
ENSG00000186395	6.12149	8.53271	0.477586	3.84643	20.9704	0.00052845	0.00611041	KRT10	protein_coding
ENSG00000182118	15.3878	12.4226	-0.308592	5.06453	20.9678	0.000528726	0.00611041	FAM89A	protein_coding
ENSG00000067057	10.4328	7.85238	-0.41068	5.66011	20.9603	0.00052951	0.00611436	PFKP	protein_coding
ENSG00000100867	2.19813	1.63165	-0.430626	3.87493	20.9534	0.000530229	0.00611755	DHRS2	protein_coding
ENSG00000105011	42.3147	51.2863	0.277703	6.5355	20.9208	0.000533659	0.00615199	ASF1B	protein_coding
ENSG00000171943	2.90783	2.31248	-0.330445	4.4312	20.8835	0.00053762	0.00619249	SRGAP2C	protein_coding
ENSG00000103507	14.693	11.9439	-0.29922	5.82649	20.8782	0.000538182	0.0061938	BCKDK	protein_coding
ENSG00000133055	1.54332	4.32521	1.4715	2.80555	20.8352	0.000542801	0.00624176	MYBPH	protein_coding
ENSG00000107736	0.31953	0.45593	0.512993	2.73681	20.8126	0.000545245	0.0062635	CDH23	protein_coding
ENSG00000172575	0.465959	0.766044	0.71604	1.52453	20.8093	0.000545597	0.0062635	RASGRP1	protein_coding
ENSG00000114098	16.0761	13.8553	-0.214289	7.37514	20.7905	0.000547642	0.00628175	ARMC8	protein_coding
ENSG00000255529	13.4149	11.1257	-0.269617	6.2812	20.7846	0.00054828	0.00628385	POLR2M	protein_coding
ENSG00000166881	35.2763	31.0508	-0.183989	7.65746	20.7303	0.000554238	0.00634688	NEMP1	protein_coding
ENSG00000148303	566.329	462.648	-0.291674	10.3077	20.7244	0.000554896	0.00634915	RPL7A	protein_coding
ENSG00000236104	7.76569	9.66975	0.316445	4.47837	20.694	0.000558266	0.00638242	ZBTB22	protein_coding
ENSG00000131378	2.19945	1.58741	-0.471356	3.35486	20.6818	0.00055962	0.00639262	RFTN1	protein_coding
ENSG00000181704	7.97022	6.63409	-0.264369	6.00106	20.6582	0.000562263	0.00641395	YIPF6	protein_coding
ENSG00000198763	2393.01	1935.17	-0.306341	11.1202	20.6533	0.000562815	0.00641395	MT-ND2	protein_coding
ENSG00000100320	22.7077	25.9615	0.19326	8.08456	20.6527	0.00056288	0.00641395	RBFOX2	protein_coding
ENSG00000102317	61.064	51.0126	-0.259364	8.3591	20.6335	0.000565042	0.00643329	RBM3	protein_coding
ENSG00000077942	18.7508	22.9111	0.288709	7.29789	20.6224	0.000566296	0.00644226	FBLN1	protein_coding
ENSG00000162512	35.2262	28.2996	-0.316016	7.63484	20.5917	0.000569789	0.00647667	SDC3	protein_coding
ENSG00000184305	0.986791	1.37515	0.477552	3.70324	20.565	0.000572838	0.00650193	CCSER1	protein_coding
ENSG00000131374	17.3485	14.6553	-0.24321	7.5679	20.564	0.000572953	0.00650193	TBC1D5	protein_coding
ENSG00000099785	1.2965	2.05666	0.665583	1.93197	20.541	0.000575598	0.00652659	MARCHF2	protein_coding
ENSG00000178752	6.36309	4.91031	-0.373713	4.33257	20.5295	0.000576929	0.00653633	ERFE	protein_coding
ENSG00000135972	40.1291	33.729	-0.250366	6.17209	20.5075	0.000579477	0.00655625	MRPS9	protein_coding
ENSG00000187902	0.463612	0.226495	-1.02739	1.14371	20.5062	0.000579637	0.00655625	SHISA7	protein_coding
ENSG00000160932	12.2637	15.1291	0.302385	5.31993	20.4709	0.000583751	0.00659739	LY6E	protein_coding
ENSG00000274070	1.96906	2.48496	0.335667	4.18535	20.465	0.000584445	0.00659983	CASTOR2	protein_coding
ENSG00000136193	63.4739	55.1152	-0.203617	8.53371	20.4492	0.0005863	0.00661538	SCRN1	protein_coding
ENSG00000078900	2.57055	3.69722	0.522964	4.20393	20.439	0.000587509	0.00661608	TP73	protein_coding
ENSG00000186469	0.117148	0.0303388	-1.91514	-0.431999	20.4374	0.000587695	0.00661608	GNG2	protein_coding
ENSG00000261504	1.71039	2.84763	0.735971	1.73291	20.4365	0.000587798	0.00661608	LINC01686	lncRNA
ENSG00000172059	0.819868	1.53174	0.900225	2.36274	20.3828	0.000594188	0.00668256	KLF11	protein_coding
ENSG00000272944	0.278072	0.786015	1.47932	-0.127164	20.3364	0.000599767	0.00673982	AC079834.2	lncRNA
ENSG00000175895	2.6826	3.5902	0.419997	3.21015	20.2736	0.000607423	0.00682031	PLEKHF2	protein_coding
ENSG00000188725	27.1729	31.8132	0.227183	6.35591	20.2486	0.000610504	0.00684933	SMIM15	protein_coding
ENSG00000072042	11.9944	10.1663	-0.238357	6.04852	20.2085	0.000615475	0.00689951	RDH11	protein_coding
ENSG00000099617	1.7364	2.69142	0.632392	2.22337	20.2035	0.000616093	0.00690084	EFNA2	protein_coding
ENSG00000234127	13.1309	15.4191	0.231832	6.05779	20.178	0.000619294	0.00693108	TRIM26	protein_coding
ENSG00000106462	23.1685	26.5023	0.193966	6.74049	20.1559	0.000622075	0.00695366	EZH2	protein_coding
ENSG00000104147	25.2835	31.2112	0.303772	4.99249	20.1517	0.000622599	0.00695366	OIP5	protein_coding
ENSG00000181019	48.4484	38.5289	-0.330623	7.48706	20.15	0.000622821	0.00695366	NQO1	protein_coding
ENSG00000176749	1.68004	2.33979	0.479149	3.24066	20.1289	0.000625486	0.00697778	CDK5R1	protein_coding
ENSG00000125249	8.42125	6.83513	-0.300878	5.46432	20.1192	0.000626726	0.00698597	RAP2A	protein_coding
ENSG00000166986	39.495	33.776	-0.225546	7.92955	20.0984	0.00062937	0.0070098	MARS1	protein_coding
ENSG00000168255	1.44623	0.864142	-0.741426	1.75265	20.0811	0.00063159	0.00702545	POLR2J3	protein_coding
ENSG00000176124	0.417179	0.550694	0.40021	3.42171	20.0795	0.000631792	0.00702545	DLEU1	lncRNA
ENSG00000124374	0.701761	1.06572	0.601611	2.55127	20.0568	0.000634725	0.00705239	PAIP2B	protein_coding
ENSG00000157851	10.1777	12.0396	0.24235	6.12754	20.0029	0.000641725	0.00712173	DPYSL5	protein_coding
ENSG00000100644	26.9677	23.6347	-0.19022	6.98275	19.9941	0.000642876	0.00712173	HIF1A	protein_coding
ENSG00000163577	2.27201	1.64566	-0.464669	3.71704	19.9933	0.000642993	0.00712173	EIF5A2	protein_coding
ENSG00000152990	11.1346	13.1113	0.235942	6.71864	19.993	0.000643027	0.00712173	ADGRA3	protein_coding
ENSG00000236094	19.9364	11.6816	-0.768913	3.59372	19.975	0.000645397	0.00714226	LINC00545	lncRNA
ENSG00000078902	6.38103	8.37762	0.391984	5.31668	19.9618	0.000647134	0.00715574	TOLLIP	protein_coding
ENSG00000145365	1.48231	2.0704	0.480713	2.85975	19.943	0.000649626	0.00717235	TIFA	protein_coding
ENSG00000040933	3.48803	2.84152	-0.295286	5.2241	19.9426	0.000649673	0.00717235	INPP4A	protein_coding
ENSG00000104320	7.34984	6.02701	-0.286451	5.23575	19.9293	0.000651439	0.00718009	NBN	protein_coding
ENSG00000255931	11.6841	8.48116	-0.460883	3.87604	19.9267	0.000651792	0.00718009	AP003108.1	lncRNA
ENSG00000108379	1.67086	2.27462	0.444831	3.1639	19.9256	0.000651932	0.00718009	WNT3	protein_coding
ENSG00000113300	9.78501	11.6384	0.250368	6.27347	19.921	0.000652551	0.00718118	CNOT6	protein_coding
ENSG00000117335	12.485	10.7519	-0.215602	6.97822	19.8851	0.000657359	0.00722833	CD46	protein_coding
ENSG00000186951	2.90704	3.50641	0.270354	5.58526	19.8794	0.000658121	0.00723097	PPARA	protein_coding
ENSG00000184985	0.919092	1.4361	0.641041	2.74487	19.8612	0.000660581	0.00724706	SORCS2	protein_coding
ENSG00000189180	6.69574	5.12718	-0.384239	5.72148	19.8608	0.000660635	0.00724706	ZNF33A	protein_coding
ENSG00000144559	8.02588	6.23064	-0.365036	5.49003	19.8377	0.000663772	0.0072757	TAMM41	protein_coding
ENSG00000224877	23.5175	29.7796	0.340497	5.1694	19.8046	0.000668284	0.00731902	NDUFAF8	protein_coding
ENSG00000150672	0.517469	0.693327	0.422253	3.21322	19.801	0.000668784	0.00731902	DLG2	protein_coding
ENSG00000126457	65.3171	57.1579	-0.192546	8.24373	19.7715	0.000672848	0.00735768	PRMT1	protein_coding
ENSG00000162104	3.62256	4.33946	0.260378	5.2467	19.7676	0.000673386	0.00735774	ADCY9	protein_coding
ENSG00000137942	4.84823	3.93256	-0.30199	4.74524	19.761	0.000674293	0.00736183	FNBP1L	protein_coding
ENSG00000177000	2.06235	2.58418	0.325576	4.68547	19.7212	0.00067984	0.00741654	MTHFR	protein_coding
ENSG00000226094	0.839658	2.03761	1.27087	-0.333276	19.7027	0.000682435	0.00743371	RPL7P3	processed_pseudogene
ENSG00000197299	9.77997	11.4465	0.227048	6.04164	19.7023	0.00068249	0.00743371	BLM	protein_coding
ENSG00000105220	47.893	40.7165	-0.234112	8.95161	19.6576	0.000688794	0.00749646	GPI	protein_coding
ENSG00000165914	1.67441	1.27993	-0.386944	4.79288	19.6181	0.000694432	0.00754823	TTC7B	protein_coding
ENSG00000118407	0.108653	0.24475	1.16256	0.266683	19.6167	0.000694642	0.00754823	FILIP1	protein_coding
ENSG00000107758	14.7162	12.4191	-0.244657	6.03939	19.6025	0.000696682	0.00755981	PPP3CB	protein_coding
ENSG00000279348	3.68174	2.52097	-0.54584	2.57151	19.6016	0.000696802	0.00755981	AC012513.3	TEC
ENSG00000137193	6.50204	8.4466	0.378187	4.60588	19.5959	0.000697621	0.00756089	PIM1	protein_coding
ENSG00000104447	1.00873	0.707622	-0.509704	3.55567	19.5933	0.000697995	0.00756089	TRPS1	protein_coding
ENSG00000185432	1.96069	2.70115	0.461914	3.15489	19.5875	0.000698838	0.00756408	METTL7A	protein_coding
ENSG00000198876	14.2866	16.7029	0.225725	6.17004	19.5816	0.000699685	0.00756733	DCAF12	protein_coding
ENSG00000139915	0.470931	0.254051	-0.886448	1.592	19.5603	0.000702784	0.0075949	MDGA2	protein_coding
ENSG00000106689	3.55412	5.24027	0.557778	3.42828	19.5447	0.000705048	0.00760817	LHX2	protein_coding
ENSG00000105829	5.25865	6.54542	0.316121	4.97209	19.5443	0.000705113	0.00760817	BET1	protein_coding
ENSG00000143502	0.989799	0.567069	-0.80151	1.58805	19.5071	0.000710563	0.00765882	SUSD4	protein_coding
ENSG00000259207	1.02226	0.676098	-0.596432	2.50442	19.5047	0.000710915	0.00765882	ITGB3	protein_coding
ENSG00000122779	5.14737	6.31838	0.295307	5.53696	19.4996	0.000711661	0.00766089	TRIM24	protein_coding
ENSG00000140538	0.880501	0.61364	-0.519657	4.62939	19.4772	0.000714976	0.00769058	NTRK3	protein_coding
ENSG00000110619	10.9118	9.50759	-0.198621	6.66081	19.4689	0.000716202	0.00769461	CARS1	protein_coding
ENSG00000051009	4.25046	5.34808	0.330732	4.48886	19.4645	0.000716867	0.00769461	FAM160A2	protein_coding
ENSG00000173120	7.71874	9.08587	0.234935	6.40678	19.4634	0.000717021	0.00769461	KDM2A	protein_coding
ENSG00000048540	0.15743	0.31642	1.00191	0.982272	19.4494	0.000719106	0.007711	LMO3	protein_coding
ENSG00000226137	5.62068	7.0179	0.320287	4.93616	19.44	0.000720512	0.00772009	BAIAP2-DT	lncRNA
ENSG00000161217	10.6273	9.15869	-0.214463	6.3279	19.4036	0.000725981	0.00777267	PCYT1A	protein_coding
ENSG00000184508	1.10428	1.62462	0.557575	2.63861	19.3994	0.000726618	0.00777346	HDDC3	protein_coding
ENSG00000148396	21.033	25.6776	0.287688	7.83207	19.3938	0.000727462	0.00777647	SEC16A	protein_coding
ENSG00000237172	7.445	9.7573	0.389713	4.44985	19.3834	0.000729039	0.00778731	B3GNT9	protein_coding
ENSG00000149929	10.2124	8.33007	-0.294124	5.00724	19.3722	0.000730743	0.00779948	HIRIP3	protein_coding
ENSG00000233124	0.853305	0.334875	-1.35148	1.8974	19.355	0.000733358	0.00782136	LINC00456	lncRNA
ENSG00000120549	5.44819	4.5606	-0.256326	5.79768	19.2919	0.000743069	0.00791418	KIAA1217	protein_coding
ENSG00000229334	1.84318	0.859514	-1.09579	1.2769	19.291	0.000743207	0.00791418	AC046143.1	lncRNA
ENSG00000165272	4.95206	3.38933	-0.548637	4.21298	19.2533	0.000749082	0.0079706	AQP3	protein_coding
ENSG00000108523	21.1403	17.8437	-0.244564	5.79333	19.2332	0.000752242	0.00799806	RNF167	protein_coding
ENSG00000101574	5.61084	6.90491	0.29965	5.1616	19.2049	0.000756708	0.00803518	METTL4	protein_coding
ENSG00000155755	10.688	8.72076	-0.293116	6.25501	19.2026	0.000757069	0.00803518	TMEM237	protein_coding
ENSG00000213398	1.43557	2.3864	0.734667	2.17282	19.199	0.000757633	0.00803518	LCAT	protein_coding
ENSG00000119471	28.7717	33.0964	0.202058	6.58486	19.1963	0.000758058	0.00803518	HSDL2	protein_coding
ENSG00000064763	0.256509	0.0967134	-1.39507	0.14405	19.1848	0.000759898	0.00804852	FAR2	protein_coding
ENSG00000158008	11.5854	9.07481	-0.353247	5.83123	19.1231	0.000769775	0.00814688	EXTL1	protein_coding
ENSG00000145349	5.98661	7.16383	0.258763	5.38962	19.1159	0.00077094	0.00815222	CAMK2D	protein_coding
ENSG00000104325	3.61062	4.5819	0.344107	4.20549	19.1127	0.000771459	0.00815222	DECR1	protein_coding
ENSG00000107771	2.53464	3.17874	0.326311	4.52779	19.1068	0.000772421	0.00815378	CCSER2	protein_coding
ENSG00000003436	1.94172	1.54269	-0.332044	4.75992	19.1045	0.000772786	0.00815378	TFPI	protein_coding
ENSG00000115289	3.9119	2.52766	-0.630447	2.73511	19.0918	0.000774858	0.0081694	PCGF1	protein_coding
ENSG00000197070	1.18257	1.96343	0.728722	2.59673	19.081	0.000776613	0.00818167	ARRDC1	protein_coding
ENSG00000072518	5.89982	7.15746	0.278717	5.30219	19.0739	0.00077778	0.00818772	MARK2	protein_coding
ENSG00000132122	5.89253	4.55737	-0.369744	4.98884	19.0178	0.000787007	0.00827855	SPATA6	protein_coding
ENSG00000142961	0.898442	1.31928	0.55219	2.62025	19.0018	0.000789668	0.00828836	MOB3C	protein_coding
ENSG00000108797	4.61963	3.48251	-0.407133	4.62855	19.0016	0.000789702	0.00828836	CNTNAP1	protein_coding
ENSG00000152700	3.62278	2.97007	-0.286252	5.21465	19.0014	0.000789739	0.00828836	SAR1B	protein_coding
ENSG00000185658	2.3285	1.93262	-0.268568	5.69614	18.9976	0.000790361	0.0082886	BRWD1	protein_coding
ENSG00000156103	0.899993	0.547633	-0.714505	3.14925	18.9746	0.000794197	0.00832251	MMP16	protein_coding
ENSG00000157107	3.80533	3.09616	-0.297523	4.5849	18.9525	0.000797913	0.00835511	FCHO2	protein_coding
ENSG00000087502	21.1112	18.2364	-0.2111	6.94664	18.9484	0.000798607	0.00835606	ERGIC2	protein_coding
ENSG00000136908	8.97659	11.2745	0.32866	4.92076	18.9426	0.000799585	0.00835996	DPM2	protein_coding
ENSG00000196510	15.0777	12.8334	-0.232196	6.35457	18.9221	0.000803046	0.0083898	ANAPC7	protein_coding
ENSG00000136944	6.09411	5.02685	-0.277915	5.18452	18.9177	0.000803799	0.00839132	LMX1B	protein_coding
ENSG00000149547	27.8149	32.4233	0.221381	6.63794	18.9005	0.000806734	0.00841561	EI24	protein_coding
ENSG00000119899	1.79423	2.53892	0.500276	2.6193	18.8891	0.000808673	0.0084216	SLC17A5	protein_coding
ENSG00000100605	10.2618	12.779	0.316019	6.06124	18.8871	0.000809023	0.0084216	ITPK1	protein_coding
ENSG00000113273	2.93198	2.24759	-0.382312	4.53493	18.8864	0.000809137	0.0084216	ARSB	protein_coding
ENSG00000086062	6.95438	8.55851	0.299497	5.18507	18.8747	0.000811132	0.00843602	B4GALT1	protein_coding
ENSG00000164924	146.017	128.831	-0.180652	10.3612	18.8668	0.000812502	0.00844391	YWHAZ	protein_coding
ENSG00000242048	1.4737	0.81951	-0.84211	1.78869	18.8567	0.000814236	0.00845557	AC093583.1	lncRNA
ENSG00000007968	9.75743	11.7998	0.274375	5.73246	18.8288	0.00081906	0.00849928	E2F2	protein_coding
ENSG00000122085	3.81518	3.14764	-0.276981	5.19618	18.8046	0.000823278	0.00852464	MTERF4	protein_coding
ENSG00000215193	2.2447	2.65953	0.244623	5.44221	18.8031	0.000823536	0.00852464	PEX26	protein_coding
ENSG00000157657	8.58393	9.97855	0.217228	6.5065	18.8023	0.00082368	0.00852464	ZNF618	protein_coding
ENSG00000174013	6.92338	8.56747	0.307617	5.37196	18.8006	0.00082397	0.00852464	FBXO45	protein_coding
ENSG00000105875	1.26741	1.75254	0.467223	3.1239	18.784	0.000826883	0.00854837	WDR91	protein_coding
ENSG00000011332	2.69346	3.57152	0.406488	3.51145	18.7773	0.000828057	0.00855411	DPF1	protein_coding
ENSG00000138029	15.8795	18.2978	0.204617	6.12635	18.7737	0.000828686	0.00855421	HADHB	protein_coding
ENSG00000197147	1.43452	1.84797	0.365551	3.61641	18.7554	0.000831918	0.00857595	LRRC8B	protein_coding
ENSG00000126391	7.55724	10.0009	0.402943	5.12276	18.7547	0.000832032	0.00857595	FRMD8	protein_coding
ENSG00000162430	31.3146	35.9685	0.199936	7.02892	18.7371	0.000835162	0.0086018	SELENON	protein_coding
ENSG00000070087	199.662	173.781	-0.200291	9.18256	18.7334	0.000835811	0.00860207	PFN2	protein_coding
ENSG00000119396	17.4041	19.9263	0.195256	6.38787	18.7101	0.000839971	0.00863828	RAB14	protein_coding
ENSG00000175274	13.8882	17.273	0.314389	6.54955	18.7067	0.00084058	0.00863828	TP53I11	protein_coding
ENSG00000139826	4.14533	3.26541	-0.343819	4.33483	18.6927	0.00084308	0.00865257	ABHD13	protein_coding
ENSG00000090470	5.61368	7.00619	0.320058	4.27484	18.6909	0.000843395	0.00865257	PDCD7	protein_coding
ENSG00000178996	2.83291	3.64897	0.365108	4.30238	18.6884	0.000843848	0.00865257	SNX18	protein_coding
ENSG00000189157	0.278667	0.161241	-0.787495	1.20012	18.6775	0.000845805	0.00866621	FAM47E	protein_coding
ENSG00000082146	20.8604	24.6457	0.240894	5.98534	18.6578	0.000849369	0.00869628	STRADB	protein_coding
ENSG00000111247	21.0256	24.7797	0.236928	5.92046	18.6366	0.00085322	0.00872013	RAD51AP1	protein_coding
ENSG00000255327	2.34664	0.991682	-1.23564	0.880081	18.6345	0.000853605	0.00872013	LINC02697	lncRNA
ENSG00000149548	2.25613	2.99808	0.410375	3.54046	18.6326	0.000853946	0.00872013	CCDC15	protein_coding
ENSG00000169783	0.190516	0.0633992	-1.5789	-0.120933	18.6311	0.000854222	0.00872013	LINGO1	protein_coding
ENSG00000204310	27.3794	23.1785	-0.240191	6.2435	18.6264	0.000855075	0.0087224	AGPAT1	protein_coding
ENSG00000139263	16.5353	14.0814	-0.231681	6.72389	18.6144	0.000857273	0.00873837	LRIG3	protein_coding
ENSG00000173598	3.60789	4.31042	0.25692	5.27476	18.6088	0.000858284	0.00874222	NUDT4	protein_coding
ENSG00000115808	3.12565	2.55223	-0.291827	5.40798	18.6013	0.000859662	0.00874981	STRN	protein_coding
ENSG00000171295	2.03393	1.42419	-0.512542	3.7289	18.5958	0.00086068	0.00875373	ZNF440	protein_coding
ENSG00000131475	36.9973	42.8517	0.212213	6.57067	18.5705	0.000865342	0.00879468	VPS25	protein_coding
ENSG00000056487	0.520365	0.804612	0.629305	1.69879	18.5527	0.000868651	0.00882182	PHF21B	protein_coding
ENSG00000136444	3.56926	4.7008	0.397657	3.85377	18.5475	0.000869605	0.00882502	RSAD1	protein_coding
ENSG00000162521	30.6569	27.2099	-0.172074	8.17531	18.5239	0.000874018	0.00885427	RBBP4	protein_coding
ENSG00000132694	5.92856	6.9362	0.226603	5.84839	18.5236	0.00087407	0.00885427	ARHGEF11	protein_coding
ENSG00000094916	48.4168	42.3546	-0.192942	9.43564	18.5217	0.00087442	0.00885427	CBX5	protein_coding
ENSG00000144834	30.9803	25.9392	-0.255715	5.74483	18.5184	0.000875049	0.00885427	TAGLN3	protein_coding
ENSG00000133985	2.93221	2.03982	-0.52206	4.16075	18.5107	0.000876488	0.00886234	TTC9	protein_coding
ENSG00000185739	56.361	48.3644	-0.220621	8.24822	18.495	0.000879431	0.0088856	SRL	protein_coding
ENSG00000138443	11.0965	9.67505	-0.197669	7.89312	18.4885	0.000880658	0.0088867	ABI2	protein_coding
ENSG00000278709	1.80073	2.59464	0.52682	2.56429	18.4876	0.000880826	0.0088867	NKILA	lncRNA
ENSG00000182263	1.81146	2.2608	0.31977	4.3322	18.468	0.000884544	0.0089177	FIGN	protein_coding
ENSG00000280206	7.9957	11.3562	0.507253	2.88365	18.4638	0.000885345	0.00891927	AC026401.3	lncRNA
ENSG00000159713	63.3584	53.7571	-0.237241	7.3307	18.4565	0.00088673	0.00892671	TPPP3	protein_coding
ENSG00000120837	12.64	15.1245	0.258511	5.96959	18.4413	0.000889619	0.00894818	NFYB	protein_coding
ENSG00000272886	4.57758	5.90871	0.369171	5.05319	18.4385	0.000890157	0.00894818	DCP1A	protein_coding
ENSG00000134308	105.041	118.172	0.169905	8.0946	18.4183	0.000894039	0.0089729	YWHAQ	protein_coding
ENSG00000212747	15.236	18.5037	0.280108	4.93697	18.4174	0.000894204	0.0089729	RTL8B	protein_coding
ENSG00000108828	19.8053	17.0662	-0.214787	5.85794	18.4115	0.000895336	0.0089729	VAT1	protein_coding
ENSG00000152219	5.50896	4.30032	-0.357842	4.79799	18.4103	0.000895561	0.0089729	ARL14EP	protein_coding
ENSG00000139436	6.70049	5.54941	-0.27148	6.5378	18.4088	0.000895862	0.0089729	GIT2	protein_coding
ENSG00000119042	1.38088	1.01331	-0.447265	3.82571	18.3997	0.000897621	0.00898401	SATB2	protein_coding
ENSG00000203666	1.47808	1.11368	-0.408848	3.54625	18.3786	0.000901693	0.00901824	EFCAB2	protein_coding
ENSG00000204590	28.0471	24.8881	-0.172455	7.87543	18.3479	0.000907678	0.00907153	GNL1	protein_coding
ENSG00000107672	7.86431	9.60452	0.288177	4.81553	18.3281	0.000911546	0.0091024	NSMCE4A	protein_coding
ENSG00000117174	6.32721	5.35263	-0.241407	5.23581	18.3254	0.000912084	0.0091024	ZNHIT6	protein_coding
ENSG00000130592	6.87829	5.26851	-0.385668	5.14789	18.2999	0.000917118	0.00914603	LSP1	protein_coding
ENSG00000111832	8.36732	9.81765	0.230652	5.67751	18.2916	0.000918765	0.00915586	RWDD1	protein_coding
ENSG00000159388	17.6188	21.562	0.291104	5.56575	18.2758	0.000921895	0.00918043	BTG2	protein_coding
ENSG00000108256	25.6129	21.8378	-0.229883	8.13685	18.2723	0.000922596	0.00918079	NUFIP2	protein_coding
ENSG00000251615	1.68391	1.06357	-0.663736	2.21518	18.252	0.000926648	0.00921344	AC104825.1	lncRNA
ENSG00000144802	1.34541	1.82884	0.441735	3.36804	18.2492	0.00092721	0.00921344	NFKBIZ	protein_coding
ENSG00000047644	4.1151	5.09944	0.309087	4.90936	18.2367	0.000929724	0.0092313	WWC3	protein_coding
ENSG00000198642	5.80584	7.00745	0.271254	5.10511	18.2336	0.000930343	0.0092313	KLHL9	protein_coding
ENSG00000072110	15.5236	13.5174	-0.199717	7.39948	18.1948	0.000938182	0.0093024	ACTN1	protein_coding
ENSG00000061918	2.14982	1.41049	-0.607968	2.86282	18.1839	0.000940388	0.0093176	GUCY1B1	protein_coding
ENSG00000055483	7.26146	8.61682	0.246876	6.17203	18.161	0.000945075	0.00935659	AC022966.1	protein_coding
ENSG00000173894	23.1032	26.9542	0.22224	7.03934	18.1575	0.000945787	0.00935659	CBX2	protein_coding
ENSG00000111716	133.364	116.155	-0.199316	8.6726	18.1548	0.000946355	0.00935659	LDHB	polymorphic_pseudogene
ENSG00000184557	1.86567	2.80303	0.584559	3.07117	18.1409	0.000949194	0.00936604	SOCS3	protein_coding
ENSG00000164683	5.79704	7.4448	0.360238	4.22147	18.1406	0.000949264	0.00936604	HEY1	protein_coding
ENSG00000138347	0.109968	0.277388	1.32115	0.419747	18.1402	0.000949343	0.00936604	MYPN	protein_coding
ENSG00000009844	26.1101	22.8499	-0.192399	7.58637	18.1342	0.000950592	0.00936871	VTA1	protein_coding
ENSG00000187741	6.27915	7.41826	0.240543	5.97326	18.1323	0.000950969	0.00936871	FANCA	protein_coding
ENSG00000048649	4.44327	5.3061	0.255967	6.32132	18.1108	0.000955414	0.00940461	RSF1	protein_coding
ENSG00000137726	31.7741	27.2212	-0.222984	7.10366	18.107	0.000956206	0.00940461	FXYD6	protein_coding
ENSG00000137563	22.7786	19.288	-0.239967	5.98035	18.1049	0.000956655	0.00940461	GGH	protein_coding
ENSG00000112941	8.43758	10.0694	0.255452	5.65929	18.1006	0.000957533	0.00940655	TENT4A	protein_coding
ENSG00000133639	8.13041	9.48609	0.222438	5.45536	18.0961	0.000958471	0.00940908	BTG1	protein_coding
ENSG00000182173	5.64438	7.14221	0.340149	4.39602	18.0732	0.000963262	0.0094494	TSEN54	protein_coding
ENSG00000184441	0.648405	1.19548	0.878309	1.83492	18.0567	0.000966716	0.00947656	AP001062.1	lncRNA
ENSG00000110200	8.99423	7.29616	-0.301475	4.4171	18.0447	0.000969252	0.00949468	ANAPC15	protein_coding
ENSG00000074590	2.80146	3.5523	0.342589	5.19269	18.0147	0.000975604	0.00955014	NUAK1	protein_coding
ENSG00000079482	0.604203	0.928604	0.61835	2.41803	17.9917	0.000980495	0.00958956	OPHN1	protein_coding
ENSG00000152520	8.82645	10.1992	0.208661	6.04692	17.9893	0.000981018	0.00958956	PAN3	protein_coding
ENSG00000140264	33.0704	37.3248	0.174648	8.09021	17.9855	0.000981825	0.00959067	SERF2	protein_coding
ENSG00000135506	34.1301	38.9906	0.191938	7.57667	17.9675	0.000985684	0.00961568	OS9	protein_coding
ENSG00000163376	4.57871	3.4783	-0.39581	4.22486	17.9671	0.000985777	0.00961568	KBTBD8	protein_coding
ENSG00000106025	116.212	99.6079	-0.222343	8.56519	17.9558	0.00098821	0.00963261	TSPAN12	protein_coding
ENSG00000084073	27.9987	24.0355	-0.220245	6.54435	17.9462	0.000990285	0.00963406	ZMPSTE24	protein_coding
ENSG00000148218	12.4598	15.0846	0.275744	5.8774	17.9452	0.000990512	0.00963406	ALAD	protein_coding
ENSG00000144596	0.252638	0.137208	-0.882564	1.95771	17.9432	0.000990936	0.00963406	GRIP2	protein_coding
ENSG00000198336	40.3759	47.7383	0.242021	6.15917	17.9381	0.000992042	0.00963406	MYL4	protein_coding
ENSG00000187720	3.10575	2.54907	-0.284653	5.42214	17.9282	0.000994198	0.00963406	THSD4	protein_coding
ENSG00000197013	2.28094	1.72776	-0.399944	4.05337	17.9281	0.000994219	0.00963406	ZNF429	protein_coding
ENSG00000141562	6.57983	7.70735	0.228222	5.83498	17.9279	0.000994257	0.00963406	NARF	protein_coding
ENSG00000181751	8.77824	6.77199	-0.373823	4.8314	17.9248	0.000994931	0.00963406	C5orf30	protein_coding
ENSG00000146433	29.2644	25.4187	-0.203116	7.25628	17.9229	0.000995347	0.00963406	TMEM181	protein_coding
ENSG00000112290	20.2109	16.892	-0.258328	5.92008	17.9223	0.000995477	0.00963406	WASF1	protein_coding
ENSG00000145860	11.8985	10.0012	-0.250442	5.69243	17.9164	0.000996764	0.00963406	RNF145	protein_coding
ENSG00000108641	1.75011	1.24804	-0.486543	3.673	17.9117	0.000997781	0.00963406	B9D1	protein_coding
ENSG00000171502	0.341287	0.580328	0.765239	1.75711	17.9117	0.000997786	0.00963406	COL24A1	protein_coding
ENSG00000018625	0.646243	0.225268	-1.52233	3.36882	17.9102	0.000998117	0.00963406	ATP1A2	protein_coding
ENSG00000112679	2.06058	2.65781	0.367578	3.66301	17.8912	0.00100226	0.00966726	DUSP22	protein_coding
ENSG00000068383	7.09863	8.62006	0.280631	4.85686	17.8094	0.00102038	0.0098343	INPP5A	protein_coding
ENSG00000140463	3.31762	4.2861	0.369978	4.02999	17.8066	0.00102101	0.0098343	BBS4	protein_coding
ENSG00000113209	8.09	10.7053	0.403167	4.93833	17.8015	0.00102216	0.0098343	PCDHB5	protein_coding
ENSG00000180694	6.95654	8.15517	0.229394	5.71888	17.8003	0.00102242	0.0098343	TMEM64	protein_coding
ENSG00000187837	17.7644	23.1	0.377779	3.88209	17.7728	0.00102863	0.00988711	H1-2	protein_coding
ENSG00000179111	1.25797	0.630056	-0.998966	1.59637	17.7475	0.00103434	0.00993515	HES7	protein_coding
ENSG00000151849	11.0937	13.0495	0.233976	6.00249	17.7318	0.00103793	0.00996266	CENPJ	protein_coding
ENSG00000132561	0.766655	1.11582	0.540394	2.23292	17.7011	0.00104497	0.0100233	MATN2	protein_coding
ENSG00000167815	57.9246	46.4153	-0.319082	6.73479	17.6733	0.00105138	0.0100778	PRDX2	protein_coding
ENSG00000153560	19.0145	21.447	0.173766	7.61843	17.6553	0.00105556	0.0101108	UBP1	protein_coding
ENSG00000168884	6.56953	8.45877	0.364856	4.37467	17.6441	0.00105817	0.0101275	TNIP2	protein_coding
ENSG00000140993	2.7615	3.81966	0.466515	3.73658	17.6416	0.00105877	0.0101275	TIGD7	protein_coding
ENSG00000175183	14.0828	16.9134	0.263957	6.41482	17.6236	0.00106299	0.0101609	CSRP2	protein_coding
ENSG00000214194	60.8161	51.5955	-0.237178	6.67527	17.6086	0.00106651	0.0101875	SMIM30	protein_coding
ENSG00000157045	10.7274	13.1192	0.290968	5.42001	17.5811	0.00107301	0.0102425	NTAN1	protein_coding
ENSG00000255112	18.5772	15.6155	-0.250689	5.87337	17.5611	0.00107776	0.0102786	CHMP1B	protein_coding
ENSG00000198805	16.1646	13.1071	-0.302179	5.91862	17.559	0.00107828	0.0102786	PNP	protein_coding
ENSG00000154957	1.07198	1.68919	0.653284	1.94261	17.5419	0.00108237	0.0103105	ZNF18	protein_coding
ENSG00000152270	1.73021	1.33727	-0.372169	4.0335	17.5251	0.00108639	0.0103417	PDE3B	protein_coding
ENSG00000196159	0.146184	0.255196	0.798114	1.50918	17.5194	0.00108776	0.0103476	FAT4	protein_coding
ENSG00000141622	1.98248	2.61459	0.399399	4.59802	17.5129	0.00108934	0.0103555	RNF165	protein_coding
ENSG00000176994	11.5722	13.4134	0.213188	6.74018	17.444	0.00110614	0.0105079	SMCR8	protein_coding
ENSG00000112531	28.9057	32.7585	0.180535	8.95893	17.4188	0.00111235	0.0105597	QKI	protein_coding
ENSG00000162734	78.3055	93.0092	0.248425	7.86957	17.405	0.00111575	0.0105847	PEA15	protein_coding
ENSG00000147862	15.7672	14.0339	-0.167988	7.69757	17.3949	0.00111826	0.0106001	NFIB	protein_coding
ENSG00000076685	13.8275	16.0437	0.214321	6.17986	17.3908	0.00111929	0.0106001	NT5C2	protein_coding
ENSG00000113456	7.32322	6.22587	-0.234232	5.58971	17.3893	0.00111968	0.0106001	RAD1	protein_coding
ENSG00000153132	5.53144	7.0848	0.35598	4.08013	17.3856	0.00112059	0.0106015	CLGN	protein_coding
ENSG00000159202	14.3061	16.5994	0.214794	6.70239	17.361	0.00112676	0.0106526	UBE2Z	protein_coding
ENSG00000205302	6.77287	5.71505	-0.244818	5.8179	17.3539	0.00112854	0.0106588	SNX2	protein_coding
ENSG00000065882	5.03557	6.01929	0.25769	5.48225	17.3522	0.00112896	0.0106588	TBC1D1	protein_coding
ENSG00000090273	54.2111	47.8578	-0.17993	7.13736	17.3463	0.00113044	0.0106613	NUDC	protein_coding
ENSG00000142230	69.4554	78.1192	0.169546	8.08414	17.3446	0.00113089	0.0106613	SAE1	protein_coding
ENSG00000135472	2.27681	1.58219	-0.524883	3.50072	17.342	0.00113154	0.0106613	FAIM2	protein_coding
ENSG00000177595	2.78108	4.37495	0.650585	4.20716	17.3363	0.00113296	0.0106627	PIDD1	protein_coding
ENSG00000054116	14.3395	16.9348	0.239867	5.7029	17.3353	0.00113323	0.0106627	TRAPPC3	protein_coding
ENSG00000002586	10.0218	11.9415	0.25278	5.61824	17.3258	0.00113564	0.0106722	CD99	protein_coding
ENSG00000249550	2.41003	2.00379	-0.26625	4.77143	17.3252	0.00113579	0.0106722	LINC01234	lncRNA
ENSG00000165804	1.37029	2.27414	0.726198	3.35745	17.3147	0.00113845	0.01069	ZNF219	protein_coding
ENSG00000196204	6.25118	7.81497	0.322898	5.20874	17.3066	0.0011405	0.0106947	RNF216P1	transcribed_unprocessed_pseudogene
ENSG00000107831	35.1372	25.2201	-0.479383	5.68992	17.3039	0.0011412	0.0106947	FGF8	protein_coding
ENSG00000063660	32.5864	50.4024	0.628501	7.70762	17.3036	0.00114127	0.0106947	GPC1	protein_coding
ENSG00000129472	7.69983	9.23706	0.262505	4.9709	17.2827	0.00114661	0.0107335	RAB2B	protein_coding
ENSG00000100711	2.13296	2.66817	0.322316	4.65206	17.2813	0.00114696	0.0107335	ZFYVE21	protein_coding
ENSG00000241316	1.24206	0.964932	-0.364929	3.86264	17.2718	0.00114941	0.0107491	SUCLG2-AS1	lncRNA
ENSG00000123243	10.3554	8.85334	-0.22617	7.1195	17.2584	0.00115286	0.010774	ITIH5	protein_coding
ENSG00000151694	3.17287	3.78951	0.255712	5.40246	17.2528	0.00115432	0.0107804	ADAM17	protein_coding
ENSG00000160113	10.7353	14.7966	0.461391	4.74516	17.2449	0.00115634	0.010792	NR2F6	protein_coding
ENSG00000250303	0.347205	0.670535	0.945782	1.39744	17.2301	0.00116018	0.0108205	LINC02762	lncRNA
ENSG00000075426	2.03608	2.84566	0.481881	4.11063	17.2209	0.00116258	0.0108356	FOSL2	protein_coding
ENSG00000070495	3.87128	4.74045	0.292207	4.55967	17.2086	0.0011658	0.0108553	JMJD6	protein_coding
ENSG00000107833	59.9824	45.9808	-0.382576	5.6695	17.2068	0.00116626	0.0108553	NPM3	protein_coding
ENSG00000115561	13.0652	15.2401	0.222302	6.42206	17.1811	0.001173	0.0109093	CHMP3	protein_coding
ENSG00000171202	21.3511	26.5236	0.313218	4.36722	17.1787	0.00117364	0.0109093	TMEM126A	protein_coding
ENSG00000178425	3.72325	2.89936	-0.360629	4.70424	17.17	0.00117591	0.010923	NT5DC1	protein_coding
ENSG00000242474	3.64472	2.79788	-0.380312	3.97331	17.1605	0.00117843	0.010939	AC093627.5	lncRNA
ENSG00000153179	22.7182	26.8278	0.240177	6.58853	17.1523	0.00118059	0.0109513	RASSF3	protein_coding
ENSG00000128739	26.4707	22.1439	-0.257129	6.38135	17.1496	0.00118133	0.0109513	SNRPN	protein_coding
ENSG00000110063	6.76225	5.52641	-0.290743	5.58489	17.1266	0.00118745	0.0110006	DCPS	protein_coding
ENSG00000090376	0.545265	0.358643	-0.602722	2.53907	17.1221	0.00118864	0.0110042	IRAK3	protein_coding
ENSG00000151414	4.19981	3.19324	-0.394929	4.53264	17.0818	0.00119948	0.0110972	NEK7	protein_coding
ENSG00000258422	0.74377	0.245481	-1.58174	-0.326439	17.0589	0.00120566	0.0111469	AL160191.1	lncRNA
ENSG00000183161	6.18513	4.7407	-0.383164	4.30964	17.0537	0.00120707	0.0111525	FANCF	protein_coding
ENSG00000172954	2.49728	1.91061	-0.387159	4.15498	17.018	0.00121685	0.0112309	LCLAT1	protein_coding
ENSG00000165304	61.3208	68.8233	0.166493	7.57764	17.0167	0.00121718	0.0112309	MELK	protein_coding
ENSG00000078142	4.27856	3.63083	-0.237135	5.95888	17.0023	0.00122115	0.01126	PIK3C3	protein_coding
ENSG00000160014	54.8232	61.7778	0.172301	7.99489	16.9761	0.00122842	0.0113195	CALM3	protein_coding
ENSG00000107669	4.82592	4.01722	-0.264628	4.78256	16.9731	0.00122925	0.0113196	ATE1	protein_coding
ENSG00000158552	9.28937	11.5638	0.315835	4.96029	16.9278	0.00124189	0.0114244	ZFAND2B	protein_coding
ENSG00000181904	7.17469	6.00468	-0.256428	5.23683	16.9264	0.00124229	0.0114244	C5orf24	protein_coding
ENSG00000114853	1.74737	2.31424	0.406203	3.34882	16.9135	0.00124594	0.011443	ZBTB47	protein_coding
ENSG00000139154	9.96468	8.60957	-0.210947	5.98035	16.9134	0.00124596	0.011443	AEBP2	protein_coding
ENSG00000144749	27.2234	23.6473	-0.203087	7.3764	16.8895	0.00125271	0.0114973	LRIG1	protein_coding
ENSG00000251247	0.915086	1.28984	0.495273	2.24887	16.8764	0.00125645	0.011524	ZNF345	protein_coding
ENSG00000149289	3.12604	2.49516	-0.324655	4.94581	16.8672	0.00125906	0.0115403	ZC3H12C	protein_coding
ENSG00000135315	3.32934	4.20153	0.335728	4.3958	16.8451	0.00126541	0.0115908	CEP162	protein_coding
ENSG00000166963	13.4297	16.1835	0.269139	7.04577	16.833	0.00126889	0.011615	MAP1A	protein_coding
ENSG00000136891	11.0618	9.60496	-0.20375	6.32649	16.8218	0.00127212	0.0116368	TEX10	protein_coding
ENSG00000108064	14.4578	16.5101	0.191387	6.26739	16.7877	0.00128203	0.0117197	TFAM	protein_coding
ENSG00000126602	29.582	26.0463	-0.183632	7.20669	16.7844	0.00128297	0.0117206	TRAP1	protein_coding
ENSG00000167515	11.9811	14.0559	0.23077	5.94063	16.7688	0.00128754	0.0117545	TRAPPC2L	protein_coding
ENSG00000155850	2.64559	3.25232	0.298338	4.5937	16.7601	0.00129009	0.0117677	SLC26A2	protein_coding
ENSG00000030304	1.91447	2.44824	0.355535	4.46804	16.7581	0.00129068	0.0117677	MUSK	protein_coding
ENSG00000057757	20.9223	24.8795	0.25001	5.57625	16.7535	0.00129202	0.0117722	PITHD1	protein_coding
ENSG00000012174	4.67212	3.89761	-0.261179	5.34847	16.7342	0.00129774	0.0118103	MBTPS2	protein_coding
ENSG00000099875	7.57068	9.86275	0.380227	5.82801	16.7336	0.00129792	0.0118103	MKNK2	protein_coding
ENSG00000196704	11.7818	13.7733	0.225388	5.60769	16.7286	0.00129938	0.0118158	AMZ2	protein_coding
ENSG00000155903	3.80112	4.66674	0.296506	5.03012	16.723	0.00130105	0.0118232	RASA2	protein_coding
ENSG00000161011	27.8014	23.3815	-0.249884	8.00626	16.7145	0.00130358	0.011832	SQSTM1	protein_coding
ENSG00000131116	13.5165	17.6971	0.387297	4.50052	16.7125	0.00130417	0.011832	ZNF428	protein_coding
ENSG00000260565	0.791744	1.05906	0.419236	3.23957	16.7105	0.00130476	0.011832	ERVK13-1	lncRNA
ENSG00000011523	3.91303	3.24848	-0.268321	4.94447	16.7082	0.00130544	0.011832	CEP68	protein_coding
ENSG00000163808	12.5244	14.6855	0.22962	5.94658	16.703	0.00130701	0.0118385	KIF15	protein_coding
ENSG00000173113	82.9058	73.0131	-0.183202	7.13973	16.6954	0.00130928	0.0118457	TRMT112	protein_coding
ENSG00000147853	15.087	17.3949	0.205578	6.06049	16.6945	0.00130953	0.0118457	AK3	protein_coding
ENSG00000144895	35.311	29.6473	-0.252046	7.66134	16.6811	0.00131355	0.0118744	EIF2A	protein_coding
ENSG00000138162	2.07304	1.6792	-0.303406	5.29436	16.6782	0.00131442	0.0118744	TACC2	protein_coding
ENSG00000137135	5.61282	6.66992	0.249144	5.11106	16.6675	0.00131765	0.0118959	ARHGEF39	protein_coding
ENSG00000150275	0.286545	0.165006	-0.794886	1.62633	16.6621	0.00131927	0.0119027	PCDH15	protein_coding
ENSG00000120709	7.74594	9.16521	0.242644	5.89976	16.6523	0.00132222	0.0119215	FAM53C	protein_coding
ENSG00000020426	11.132	8.91979	-0.319454	5.43539	16.6493	0.00132312	0.0119219	MNAT1	protein_coding
ENSG00000144747	8.67835	7.55153	-0.200647	6.01624	16.639	0.00132625	0.0119404	TMF1	protein_coding
ENSG00000104763	2.73249	2.22464	-0.296869	5.38931	16.6369	0.0013269	0.0119404	ASAH1	protein_coding
ENSG00000070413	18.9106	23.9891	0.342684	6.65505	16.6304	0.00132885	0.0119502	DGCR2	protein_coding
ENSG00000227057	35.3464	31.1081	-0.184187	6.53119	16.6041	0.00133688	0.0120145	WDR46	protein_coding
ENSG00000186487	0.42538	0.323411	-0.396264	4.67527	16.5831	0.00134333	0.0120647	MYT1L	protein_coding
ENSG00000108830	4.89999	3.90065	-0.328276	4.23353	16.5735	0.00134629	0.0120834	RND2	protein_coding
ENSG00000176087	22.7286	26.6701	0.230722	6.28946	16.5637	0.00134934	0.0120953	SLC35A4	protein_coding
ENSG00000114439	8.36279	9.73277	0.219105	6.73925	16.5636	0.00134937	0.0120953	BBX	protein_coding
ENSG00000123415	8.02898	9.3527	0.220365	5.59163	16.5397	0.00135678	0.0121539	SMUG1	protein_coding
ENSG00000090612	5.50692	4.59558	-0.260608	6.29459	16.5335	0.00135872	0.0121633	ZNF268	protein_coding
ENSG00000135821	21.0991	24.0706	0.190169	7.62906	16.5228	0.00136204	0.0121797	GLUL	protein_coding
ENSG00000133313	16.2031	14.3313	-0.176988	7.30378	16.522	0.00136231	0.0121797	CNDP2	protein_coding
ENSG00000141425	9.10319	7.64585	-0.25154	6.18038	16.4808	0.00137527	0.0122876	RPRD1A	protein_coding
ENSG00000124191	1.87756	2.70588	0.525818	2.78311	16.478	0.00137617	0.0122877	TOX2	protein_coding
ENSG00000086102	7.85485	6.50163	-0.272215	5.74346	16.4727	0.00137783	0.0122904	NFX1	protein_coding
ENSG00000054179	0.235957	0.529488	1.15358	0.0353996	16.4713	0.00137829	0.0122904	ENTPD2	protein_coding
ENSG00000134532	0.870233	0.613988	-0.501749	3.07527	16.4686	0.00137913	0.0122904	SOX5	protein_coding
ENSG00000105976	34.311	29.8594	-0.200378	7.87802	16.4409	0.00138797	0.0123548	MET	protein_coding
ENSG00000268388	4.2556	3.41191	-0.318202	5.07204	16.4381	0.00138886	0.0123548	FENDRR	lncRNA
ENSG00000188811	4.5605	3.52142	-0.37212	5.13846	16.4375	0.00138905	0.0123548	NHLRC3	protein_coding
ENSG00000253250	7.54804	10.4597	0.469258	3.16152	16.4283	0.00139201	0.0123733	C8orf88	protein_coding
ENSG00000124201	6.817	8.10593	0.250329	6.1969	16.4242	0.0013933	0.0123767	ZNFX1	protein_coding
ENSG00000164118	1.78041	1.33298	-0.41843	3.49076	16.412	0.00139723	0.0124036	CEP44	protein_coding
ENSG00000172469	8.13852	6.92955	-0.232131	5.30441	16.393	0.00140337	0.0124473	MANEA	protein_coding
ENSG00000178691	35.9413	31.7818	-0.177408	7.85538	16.3901	0.00140433	0.0124473	SUZ12	protein_coding
ENSG00000090581	4.83352	6.12867	0.342137	4.48811	16.3853	0.00140586	0.0124473	GNPTG	protein_coding
ENSG00000081154	76.3192	65.2693	-0.225512	7.78276	16.3842	0.00140624	0.0124473	PCNP	protein_coding
ENSG00000158092	14.8438	12.7556	-0.218471	6.29355	16.3829	0.00140664	0.0124473	NCK1	protein_coding
ENSG00000088325	143.017	159.857	0.160622	9.00507	16.3396	0.00142079	0.0125644	TPX2	protein_coding
ENSG00000156639	28.8411	32.8477	0.18776	6.7066	16.3224	0.00142646	0.0126065	ZFAND3	protein_coding
ENSG00000106683	10.9	13.481	0.306062	6.46043	16.2907	0.00143696	0.0126912	LIMK1	protein_coding
ENSG00000120832	5.12734	6.53892	0.350437	4.18182	16.2769	0.00144157	0.0127227	MTERF2	protein_coding
ENSG00000164506	8.85428	7.55006	-0.229531	6.53954	16.2745	0.00144237	0.0127227	STXBP5	protein_coding
ENSG00000204370	46.3657	38.827	-0.255821	6.93377	16.2668	0.00144497	0.0127375	SDHD	protein_coding
ENSG00000123352	6.34817	7.68397	0.275988	5.35891	16.2634	0.00144609	0.0127392	SPATS2	protein_coding
ENSG00000211456	6.29775	5.39344	-0.223454	5.58309	16.255	0.00144892	0.012756	SACM1L	polymorphic_pseudogene
ENSG00000030582	26.4673	34.2449	0.370867	6.908	16.2409	0.00145367	0.0127897	GRN	protein_coding
ENSG00000245532	1.10157	1.47317	0.418893	4.5804	16.2235	0.00145956	0.0128334	NEAT1	lncRNA
ENSG00000126107	12.3437	14.5756	0.239524	5.949	16.2087	0.00146459	0.0128694	HECTD3	protein_coding
ENSG00000267575	0.999105	0.779842	-0.356982	3.64748	16.1928	0.00147001	0.0129088	AC006504.5	lncRNA
ENSG00000144357	5.7639	6.64136	0.204486	5.83699	16.1517	0.00148412	0.0130223	UBR3	protein_coding
ENSG00000087589	2.31381	3.06023	0.403346	3.49122	16.1497	0.00148482	0.0130223	CASS4	protein_coding
ENSG00000142687	6.13575	7.07387	0.205387	5.98077	16.1432	0.00148706	0.0130337	KIAA0319L	protein_coding
ENSG00000107611	0.127263	0.0629251	-1.01014	0.546328	16.127	0.0014927	0.0130748	CUBN	protein_coding
ENSG00000162302	7.36864	10.1004	0.453339	4.95005	16.1132	0.00149752	0.0131087	RPS6KA4	protein_coding
ENSG00000125744	9.34158	11.4065	0.287479	5.20486	16.1047	0.00150048	0.0131147	RTN2	protein_coding
ENSG00000152061	1.78675	1.45161	-0.2992	4.56487	16.1031	0.00150104	0.0131147	RABGAP1L	protein_coding
ENSG00000136628	36.9705	32.3872	-0.191041	7.52702	16.1031	0.00150105	0.0131147	EPRS1	protein_coding
ENSG00000079313	5.56903	7.83123	0.490511	4.90744	16.0984	0.00150267	0.013118	REXO1	protein_coding
ENSG00000092853	9.6981	10.9207	0.171267	6.63514	16.0942	0.00150416	0.013118	CLSPN	protein_coding
ENSG00000204120	5.74054	6.57608	0.196026	6.26203	16.0939	0.00150427	0.013118	GIGYF2	protein_coding
ENSG00000176022	7.43526	9.14946	0.299037	4.43116	16.0821	0.00150843	0.0131444	B3GALT6	protein_coding
ENSG00000107937	28.0996	24.9946	-0.168997	7.44339	16.0799	0.0015092	0.0131444	GTPBP4	protein_coding
ENSG00000100714	10.9126	9.30418	-0.22989	6.98714	16.0741	0.00151123	0.0131538	MTHFD1	protein_coding
ENSG00000150768	34.4999	30.5425	-0.175686	7.32052	16.0578	0.00151699	0.0131956	DLAT	protein_coding
ENSG00000144677	5.49497	4.63007	-0.246775	4.96789	16.0457	0.00152131	0.0132249	CTDSPL	protein_coding
ENSG00000101003	33.6797	37.8221	0.167275	7.27027	16.0245	0.00152884	0.013282	GINS1	protein_coding
ENSG00000169926	5.54051	6.56454	0.244482	5.55097	16.0144	0.00153247	0.0133051	KLF13	protein_coding
ENSG00000063046	112.207	100.505	-0.15889	9.45769	16.0007	0.0015374	0.0133395	EIF4B	protein_coding
ENSG00000244187	16.8895	20.624	0.288139	4.63369	15.9883	0.00154189	0.0133702	TMEM141	protein_coding
ENSG00000143612	66.0688	57.8414	-0.19175	7.49484	15.9835	0.00154362	0.0133768	C1orf43	protein_coding
ENSG00000146425	42.716	49.6142	0.215949	6.96474	15.9785	0.00154542	0.013384	DYNLT1	protein_coding
ENSG00000145354	10.3638	8.67564	-0.256276	5.99801	15.964	0.00155069	0.0134211	CISD2	protein_coding
ENSG00000242242	0.896342	1.41752	0.659475	1.83924	15.9425	0.00155852	0.0134805	NECTIN3-AS1	lncRNA
ENSG00000109572	5.76891	4.9227	-0.229146	5.47422	15.9299	0.00156314	0.0135089	CLCN3	protein_coding
ENSG00000259820	2.6787	2.06026	-0.377671	3.87658	15.9282	0.00156376	0.0135089	AC083843.3	lncRNA
ENSG00000112715	1.92416	1.61743	-0.250531	5.30658	15.9227	0.00156579	0.013518	VEGFA	polymorphic_pseudogene
ENSG00000119401	11.9812	14.3651	0.26212	5.64235	15.9172	0.00156782	0.0135271	TRIM32	protein_coding
ENSG00000189067	10.8101	12.76	0.23955	5.94389	15.9036	0.00157283	0.0135619	LITAF	protein_coding
ENSG00000151470	0.821847	1.14735	0.480871	2.56539	15.8995	0.00157435	0.0135665	C4orf33	protein_coding
ENSG00000105750	3.56865	4.37778	0.295202	4.30366	15.8948	0.00157609	0.013573	ZNF85	protein_coding
ENSG00000139926	0.741318	1.04043	0.487329	3.27596	15.8906	0.00157765	0.0135776	FRMD6	protein_coding
ENSG00000071051	7.908	10.454	0.401594	4.64018	15.8881	0.00157858	0.0135776	NCK2	protein_coding
ENSG00000153214	3.9921	3.27926	-0.28369	4.37542	15.878	0.00158233	0.0136013	TMEM87B	protein_coding
ENSG00000162745	27.1531	33.5847	0.30621	6.37781	15.8751	0.00158342	0.0136022	OLFML2B	protein_coding
ENSG00000132613	38.6462	50.1491	0.375425	7.61745	15.8631	0.00158789	0.0136322	MTSS2	protein_coding
ENSG00000265808	10.4046	11.8612	0.189032	6.53379	15.851	0.0015924	0.0136624	SEC22B	protein_coding
ENSG00000089022	4.44559	3.85813	-0.204264	5.90481	15.8461	0.00159427	0.01367	MAPKAPK5	protein_coding
ENSG00000279673	2.25515	3.45776	0.61884	1.93626	15.8001	0.00161164	0.0138103	AC092919.3	TEC
ENSG00000115525	2.39908	2.06078	-0.219135	5.69292	15.7827	0.00161828	0.0138586	ST3GAL5	protein_coding
ENSG00000148153	15.6938	18.3521	0.226083	6.0334	15.7747	0.00162135	0.0138763	INIP	protein_coding
ENSG00000165424	17.6785	20.8062	0.2349	6.36614	15.7645	0.00162526	0.0139012	ZCCHC24	protein_coding
ENSG00000179818	0.455713	0.358191	-0.346922	3.69537	15.7562	0.00162845	0.0139199	PCBP1-AS1	lncRNA
ENSG00000010295	7.88529	6.4346	-0.293932	5.24084	15.7413	0.00163419	0.0139603	IFFO1	protein_coding
ENSG00000103522	1.64072	2.37398	0.53311	3.57674	15.7121	0.0016455	0.0140482	IL21R	protein_coding
ENSG00000057704	5.95062	4.64369	-0.357135	5.17489	15.7063	0.00164776	0.0140589	TMCC3	protein_coding
ENSG00000259330	13.2582	15.6722	0.24135	5.38608	15.6893	0.00165441	0.0140995	INAFM2	protein_coding
ENSG00000241685	16.5225	19.5134	0.240195	5.00911	15.6889	0.00165456	0.0140995	ARPC1A	protein_coding
ENSG00000103121	3.72065	4.3776	0.23457	5.66572	15.6836	0.00165667	0.0141028	CMC2	protein_coding
ENSG00000072609	3.18545	3.836	0.267451	5.80045	15.68	0.00165808	0.0141028	CHFR	protein_coding
ENSG00000114859	1.90889	1.47238	-0.373984	4.00549	15.6759	0.00165967	0.0141028	CLCN2	protein_coding
ENSG00000100485	4.54289	5.44727	0.26234	4.98875	15.6752	0.00165996	0.0141028	SOS2	protein_coding
ENSG00000275023	6.51026	7.80046	0.26055	6.7359	15.675	0.00166005	0.0141028	MLLT6	protein_coding
ENSG00000140395	7.8467	6.44029	-0.284468	5.64259	15.6599	0.00166599	0.0141445	WDR61	protein_coding
ENSG00000138801	22.5428	19.8012	-0.187137	6.1055	15.6518	0.0016692	0.0141631	PAPSS1	protein_coding
ENSG00000088682	15.6396	12.9083	-0.276363	5.97455	15.6318	0.00167714	0.0142217	COQ9	protein_coding
ENSG00000158220	0.665671	0.436482	-0.608032	3.94792	15.6187	0.00168236	0.0142572	ESYT3	protein_coding
ENSG00000163743	12.1266	10.0917	-0.264624	6.25326	15.5984	0.00169049	0.0143174	RCHY1	protein_coding
ENSG00000250510	1.75118	2.35887	0.430318	2.77941	15.5928	0.00169276	0.0143278	GPR162	protein_coding
ENSG00000181924	23.4613	27.9483	0.25278	5.54039	15.5821	0.00169709	0.0143518	COA4	protein_coding
ENSG00000165795	2.18788	2.69328	0.300014	4.16583	15.5806	0.00169767	0.0143518	NDRG2	protein_coding
ENSG00000120594	1.54586	1.96848	0.349065	4.28035	15.5743	0.00170023	0.0143646	PLXDC2	protein_coding
ENSG00000115163	12.5538	15.79	0.330293	4.64882	15.5504	0.00170994	0.0144379	CENPA	protein_coding
ENSG00000015133	0.414809	0.634421	0.612004	2.47624	15.5452	0.00171204	0.0144423	CCDC88C	protein_coding
ENSG00000167778	7.06197	9.01842	0.353004	4.51081	15.5435	0.00171274	0.0144423	SPRYD3	protein_coding
ENSG00000172340	18.4591	21.2955	0.206255	6.0444	15.5414	0.0017136	0.0144423	SUCLG2	protein_coding
ENSG00000141404	3.06255	2.39165	-0.355882	4.65409	15.5087	0.00172701	0.0145464	GNAL	protein_coding
ENSG00000135919	12.0662	10.5243	-0.197289	6.99262	15.5038	0.00172903	0.0145546	SERPINE2	protein_coding
ENSG00000145335	4.89886	4.07071	-0.267161	4.74172	15.4994	0.00173084	0.014561	SNCA	protein_coding
ENSG00000002834	26.8777	31.4764	0.227754	7.67563	15.4889	0.00173521	0.0145888	LASP1	protein_coding
ENSG00000044115	19.3587	21.6887	0.163891	7.49249	15.4759	0.00174061	0.0146202	CTNNA1	protein_coding
ENSG00000125247	3.20389	2.6211	-0.289516	4.2656	15.4748	0.00174106	0.0146202	TMTC4	protein_coding
ENSG00000158805	5.49104	4.53519	-0.276134	5.20629	15.4532	0.00175007	0.014687	ZNF276	protein_coding
ENSG00000285043	0.683391	0.374711	-0.867885	1.20105	15.4495	0.00175163	0.0146911	AC093512.2	protein_coding
ENSG00000134910	14.9192	13.0128	-0.197136	6.71266	15.4422	0.00175467	0.0147077	STT3A	protein_coding
ENSG00000006071	0.280367	0.177243	-0.659287	1.42549	15.4164	0.00176555	0.0147774	ABCC8	protein_coding
ENSG00000173926	8.90059	7.55703	-0.23576	5.27693	15.4148	0.00176622	0.0147774	MARCHF3	protein_coding
ENSG00000198087	3.05374	2.48845	-0.294956	4.40321	15.4141	0.00176653	0.0147774	CD2AP	protein_coding
ENSG00000173171	5.03058	4.00683	-0.32788	4.00831	15.4123	0.00176726	0.0147774	MTX1	protein_coding
ENSG00000031691	13.6606	16.9799	0.314175	4.88063	15.3939	0.00177509	0.0148339	CENPQ	protein_coding
ENSG00000187713	37.1502	43.0731	0.213715	5.94156	15.3649	0.00178745	0.0149282	TMEM203	protein_coding
ENSG00000022267	9.82241	11.6023	0.240685	5.90768	15.3436	0.00179664	0.0149959	FHL1	protein_coding
ENSG00000140564	6.42034	9.07801	0.498067	4.81699	15.3207	0.00180655	0.0150695	FURIN	protein_coding
ENSG00000147041	0.710531	0.418853	-0.763023	1.71263	15.2989	0.00181605	0.0151396	SYTL5	protein_coding
ENSG00000171206	7.33752	9.32505	0.345079	5.97345	15.2882	0.00182072	0.0151694	TRIM8	protein_coding
ENSG00000245910	42.8436	50.4276	0.234621	5.94382	15.2829	0.00182304	0.0151795	SNHG6	lncRNA
ENSG00000083937	45.3883	39.7325	-0.191949	7.05393	15.2688	0.00182924	0.0152219	CHMP2B	protein_coding
ENSG00000043093	8.25999	7.03726	-0.230861	6.06405	15.2659	0.0018305	0.0152219	DCUN1D1	protein_coding
ENSG00000143333	27.1894	31.4988	0.212319	6.35181	15.2638	0.00183143	0.0152219	RGS16	protein_coding
ENSG00000229619	0.107822	0.202861	0.907616	0.119051	15.2474	0.00183869	0.015273	MBNL1-AS1	lncRNA
ENSG00000213380	5.25421	4.47545	-0.231232	5.16332	15.2052	0.0018575	0.0154142	COG8	protein_coding
ENSG00000132359	7.07484	5.88413	-0.26578	5.62283	15.2043	0.00185791	0.0154142	AC002316.1	protein_coding
ENSG00000170365	4.60892	3.74175	-0.299876	5.10453	15.2004	0.00185968	0.0154196	SMAD1	protein_coding
ENSG00000151806	16.1132	13.1654	-0.291014	6.15548	15.1699	0.00187342	0.0155242	GUF1	protein_coding
ENSG00000128272	211.229	187.728	-0.170102	9.01427	15.1573	0.00187913	0.0155534	ATF4	protein_coding
ENSG00000070770	22.7691	19.4306	-0.228459	7.23539	15.1572	0.00187919	0.0155534	CSNK2A2	protein_coding
ENSG00000020633	4.86911	6.11232	0.328694	4.68052	15.1358	0.00188894	0.0156248	RUNX3	protein_coding
ENSG00000118402	4.4563	3.41965	-0.381455	3.64176	15.1188	0.00189671	0.0156796	ELOVL4	protein_coding
ENSG00000122008	3.25397	3.88992	0.257792	4.93558	15.1081	0.00190165	0.0157111	POLK	protein_coding
ENSG00000141985	22.1416	28.9846	0.387995	6.45353	15.096	0.00190722	0.0157476	SH3GL1	protein_coding
ENSG00000179833	5.57414	6.56813	0.236812	5.05188	15.072	0.00191834	0.01583	SERTAD2	protein_coding
ENSG00000117593	10.6578	12.3637	0.21423	6.28504	15.066	0.00192113	0.0158436	DARS2	protein_coding
ENSG00000166317	2.3404	3.4387	0.554024	4.08346	15.0492	0.00192901	0.0158991	SYNPO2L	protein_coding
ENSG00000168268	36.6931	41.0945	0.163467	7.29529	14.9632	0.00196979	0.0162252	NT5DC2	protein_coding
ENSG00000100628	0.344227	0.675319	0.971128	1.95912	14.9608	0.00197092	0.0162252	ASB2	protein_coding
ENSG00000109670	0.805222	1.04774	0.379195	3.40744	14.9568	0.00197288	0.0162316	FBXW7	protein_coding
ENSG00000145439	2.45239	1.86514	-0.394848	3.56837	14.9497	0.00197625	0.0162497	CBR4	protein_coding
ENSG00000140941	15.446	17.6277	0.190822	6.56225	14.9398	0.00198104	0.0162794	MAP1LC3B	protein_coding
ENSG00000130707	300.547	256.49	-0.228611	9.66384	14.9046	0.00199813	0.0164101	ASS1	protein_coding
ENSG00000165782	15.065	17.7577	0.237518	5.99684	14.8961	0.00200232	0.0164305	PIP4P1	protein_coding
ENSG00000166189	9.18026	11.1845	0.284445	4.79817	14.8937	0.00200346	0.0164305	HPS6	protein_coding
ENSG00000113248	1.13913	1.61831	0.504861	2.42298	14.8922	0.00200419	0.0164305	PCDHB15	protein_coding
ENSG00000181744	2.35226	3.00667	0.353283	3.84584	14.8849	0.00200781	0.0164504	DIPK2A	protein_coding
ENSG00000104679	11.4559	13.764	0.26458	4.77815	14.8743	0.00201299	0.0164832	R3HCC1	protein_coding
ENSG00000183666	1.06488	1.40675	0.401827	2.8873	14.8564	0.00202181	0.0165409	GUSBP1	transcribed_unprocessed_pseudogene
ENSG00000214654	0.954976	1.44247	0.594286	1.62212	14.8552	0.00202243	0.0165409	B3GNT10	protein_coding
ENSG00000197951	2.30749	2.85606	0.307447	3.87676	14.8425	0.00202872	0.0165825	ZNF71	protein_coding
ENSG00000184752	36.1911	29.9954	-0.270523	5.88962	14.8279	0.00203599	0.0166311	NDUFA12	protein_coding
ENSG00000175354	5.55637	4.7558	-0.224252	5.66777	14.8257	0.00203708	0.0166311	PTPN2	protein_coding
ENSG00000181061	64.9619	54.0454	-0.264985	6.6744	14.8208	0.00203953	0.0166413	HIGD1A	protein_coding
ENSG00000112851	9.70741	10.9166	0.169491	6.65297	14.8017	0.00204908	0.0167094	ERBIN	protein_coding
ENSG00000070010	10.5329	11.9884	0.186933	6.646	14.7909	0.00205453	0.0167402	UFD1	protein_coding
ENSG00000147145	12.2874	10.2346	-0.263229	5.23096	14.7894	0.00205528	0.0167402	LPAR4	protein_coding
ENSG00000135631	1.88805	2.50026	0.404835	3.82245	14.7845	0.00205778	0.0167506	RAB11FIP5	protein_coding
ENSG00000114107	14.5133	16.9885	0.22702	5.97407	14.7811	0.00205949	0.0167547	CEP70	protein_coding
ENSG00000139625	1.42224	1.03242	-0.461676	3.53492	14.7673	0.0020665	0.0168018	MAP3K12	protein_coding
ENSG00000006016	3.009	4.36224	0.532793	3.5241	14.7613	0.00206953	0.0168166	CRLF1	protein_coding
ENSG00000204439	9.86104	11.863	0.26676	4.71493	14.7387	0.00208103	0.0168909	C6orf47	protein_coding
ENSG00000188818	0.463814	0.290476	-0.674261	1.39831	14.7386	0.00208111	0.0168909	ZDHHC11	protein_coding
ENSG00000013583	3.65124	4.80699	0.397601	3.7612	14.7297	0.00208568	0.016918	HEBP1	protein_coding
ENSG00000164039	11.574	13.4237	0.213981	6.02843	14.7265	0.0020873	0.0169212	BDH2	protein_coding
ENSG00000067955	37.0116	42.0731	0.184943	7.57699	14.7143	0.00209358	0.0169622	CBFB	protein_coding
ENSG00000271857	1.28386	0.418416	-1.60294	0.0892248	14.6914	0.00210539	0.0170453	AL096865.1	lncRNA
ENSG00000108587	8.40349	9.45067	0.169435	6.41239	14.6897	0.00210631	0.0170453	GOSR1	protein_coding
ENSG00000239305	2.73483	2.25074	-0.280819	4.48189	14.6827	0.00210994	0.0170519	RNF103	protein_coding
ENSG00000134986	5.0375	5.90261	0.228888	5.4746	14.6819	0.00211034	0.0170519	NREP	protein_coding
ENSG00000130164	3.99371	4.87931	0.288496	5.12666	14.6744	0.00211423	0.0170519	LDLR	protein_coding
ENSG00000168542	32.0923	36.6586	0.191779	7.65586	14.6741	0.00211439	0.0170519	COL3A1	protein_coding
ENSG00000107438	3.68995	4.87779	0.403179	3.19798	14.6727	0.00211513	0.0170519	PDLIM1	protein_coding
ENSG00000168497	0.788043	0.38172	-1.04227	1.3452	14.6724	0.00211528	0.0170519	CAVIN2	protein_coding
ENSG00000127328	1.943	2.30156	0.244413	4.63382	14.6715	0.00211576	0.0170519	RAB3IP	protein_coding
ENSG00000129657	11.19	12.5236	0.162439	6.97433	14.6661	0.00211857	0.0170647	SEC14L1	protein_coding
ENSG00000163528	39.2438	33.2467	-0.238795	6.1017	14.661	0.00212123	0.0170761	CHCHD4	protein_coding
ENSG00000147654	6.97599	5.56392	-0.325927	4.73092	14.6542	0.00212482	0.017095	EBAG9	protein_coding
ENSG00000018408	10.4275	8.92875	-0.224086	6.53253	14.6377	0.00213346	0.0171518	WWTR1	protein_coding
ENSG00000125347	1.17872	1.55117	0.395634	3.61228	14.636	0.00213435	0.0171518	IRF1	protein_coding
ENSG00000069943	0.549556	0.320252	-0.775613	1.12293	14.592	0.00215769	0.0173292	PIGB	protein_coding
ENSG00000186283	9.09732	10.7075	0.235445	4.96873	14.5841	0.00216189	0.0173529	TOR3A	protein_coding
ENSG00000116752	64.258	56.3276	-0.190104	6.27017	14.5794	0.00216442	0.0173631	BCAS2	protein_coding
ENSG00000157227	16.5986	20.8164	0.325948	6.72793	14.5713	0.00216874	0.0173877	MMP14	protein_coding
ENSG00000139636	1.37471	2.05533	0.579458	3.49113	14.5452	0.00218285	0.0174906	LMBR1L	protein_coding
ENSG00000204392	24.9993	31.333	0.326425	4.82173	14.5383	0.00218656	0.0175102	LSM2	protein_coding
ENSG00000177283	6.37353	8.14564	0.352447	4.75098	14.5349	0.00218839	0.0175148	FZD8	protein_coding
ENSG00000145794	8.30881	7.26395	-0.193934	5.89133	14.5213	0.00219578	0.0175637	MEGF10	protein_coding
ENSG00000117543	25.6083	22.411	-0.192392	6.23458	14.5151	0.00219919	0.0175808	DPH5	protein_coding
ENSG00000171124	2.16703	1.46723	-0.563361	2.71825	14.4918	0.00221191	0.0176723	FUT3	protein_coding
ENSG00000178695	3.46906	4.28233	0.303284	4.3151	14.4773	0.00221987	0.017723	KCTD12	protein_coding
ENSG00000228794	2.38658	2.85586	0.258752	5.47116	14.4756	0.00222082	0.017723	LINC01128	lncRNA
ENSG00000240024	12.3106	10.2546	-0.263447	4.62996	14.4725	0.00222254	0.0177265	LINC00888	transcribed_unprocessed_pseudogene
ENSG00000160285	11.8833	14.2886	0.26528	6.34774	14.4682	0.00222491	0.0177351	LSS	protein_coding
ENSG00000160606	9.76095	7.51118	-0.377401	3.62562	14.4474	0.00223647	0.017817	TLCD1	protein_coding
ENSG00000123933	0.964531	1.50407	0.637122	2.97466	14.445	0.00223781	0.0178174	MXD4	protein_coding
ENSG00000175416	11.3174	14.206	0.32722	4.65682	14.4227	0.00225026	0.0179013	CLTB	protein_coding
ENSG00000157353	0.548022	0.80216	0.548295	2.18062	14.4215	0.00225094	0.0179013	FCSK	protein_coding
ENSG00000100784	0.223338	0.144948	-0.623409	2.88984	14.4153	0.00225439	0.017913	RPS6KA5	protein_coding
ENSG00000120334	4.60613	5.72479	0.314217	4.59959	14.4142	0.002255	0.017913	CENPL	protein_coding
ENSG00000152592	0.877988	0.49436	-0.825501	1.60686	14.3592	0.00228615	0.01815	DMP1	protein_coding
ENSG00000109846	3.38511	2.59947	-0.379762	3.88493	14.321	0.00230804	0.0183132	CRYAB	protein_coding
ENSG00000068400	7.94093	6.78541	-0.227148	5.77283	14.2948	0.00232324	0.0184233	GRIPAP1	protein_coding
ENSG00000100982	24.8666	20.8656	-0.252748	6.33202	14.2908	0.00232558	0.0184313	PCIF1	protein_coding
ENSG00000116455	53.905	45.9871	-0.228975	6.99879	14.2871	0.00232772	0.0184377	WDR77	protein_coding
ENSG00000139433	8.98594	10.7451	0.258367	4.79086	14.2739	0.0023354	0.0184879	GLTP	protein_coding
ENSG00000204131	0.0821826	0.0338792	-1.27223	0.546499	14.2706	0.00233736	0.0184929	NHSL2	protein_coding
ENSG00000155660	78.6346	70.0311	-0.167161	8.00227	14.248	0.0023506	0.018587	PDIA4	protein_coding
ENSG00000132664	12.3686	10.208	-0.276492	4.932	14.2345	0.00235862	0.0186397	POLR3F	protein_coding
ENSG00000104774	5.12061	6.23035	0.28235	4.83083	14.2287	0.002362	0.0186557	MAN2B1	protein_coding
ENSG00000156011	1.05396	1.37454	0.383821	4.1772	14.226	0.00236362	0.0186579	PSD3	protein_coding
ENSG00000148735	5.70931	4.65729	-0.293342	5.1863	14.2066	0.00237514	0.0187382	PLEKHS1	protein_coding
ENSG00000230989	46.4919	41.1343	-0.176593	8.7354	14.2028	0.00237744	0.0187456	HSBP1	protein_coding
ENSG00000166167	11.1733	9.47898	-0.237305	5.9123	14.1982	0.00238019	0.0187526	BTRC	protein_coding
ENSG00000125834	5.11712	5.9926	0.227586	5.00943	14.1967	0.00238105	0.0187526	STK35	protein_coding
ENSG00000185745	0.343397	0.710923	1.05021	1.101	14.1884	0.00238602	0.0187811	IFIT1	protein_coding
ENSG00000136682	4.18707	3.51868	-0.251005	4.81464	14.1766	0.00239314	0.0188264	CBWD2	protein_coding
ENSG00000170681	7.93892	6.53379	-0.28115	4.47526	14.1592	0.0024036	0.0188979	CAVIN4	protein_coding
ENSG00000099954	5.36376	6.31274	0.235228	6.12744	14.153	0.00240739	0.018917	CECR2	protein_coding
ENSG00000177425	2.75553	2.17829	-0.338996	4.76858	14.1456	0.00241185	0.0189412	PAWR	protein_coding
ENSG00000131747	133.929	155.828	0.218443	9.79787	14.1384	0.00241627	0.0189651	TOP2A	protein_coding
ENSG00000158292	8.01996	9.82045	0.291726	4.96404	14.1341	0.00241883	0.0189745	GPR153	protein_coding
ENSG00000110429	3.7388	4.35882	0.221106	5.48846	14.1193	0.0024279	0.0190248	FBXO3	protein_coding
ENSG00000162511	2.97172	1.77461	-0.74638	3.60211	14.1191	0.002428	0.0190248	LAPTM5	protein_coding
ENSG00000236289	0.300108	0.113919	-1.38624	0.0533977	14.1114	0.00243275	0.0190513	GACAT3	lncRNA
ENSG00000173825	0.334689	0.73772	1.13359	0.434711	14.1042	0.00243714	0.0190748	TIGD3	protein_coding
ENSG00000139985	0.442582	0.198109	-1.15548	0.208341	14.0958	0.0024423	0.0191044	ADAM21	protein_coding
ENSG00000151617	0.521495	0.306781	-0.761746	1.00218	14.0806	0.00245172	0.0191672	EDNRA	protein_coding
ENSG00000196376	0.862444	0.516382	-0.737719	2.05675	14.0653	0.00246121	0.0192305	SLC35F1	protein_coding
ENSG00000108406	10.9687	9.43627	-0.217011	5.97039	14.0413	0.00247618	0.0193366	DHX40	protein_coding
ENSG00000135617	12.7291	15.8275	0.314921	4.14503	14.0307	0.00248278	0.0193772	PRADC1	protein_coding
ENSG00000139146	20.6686	17.4409	-0.244751	6.92444	14.0113	0.002495	0.0194616	SINHCAF	protein_coding
ENSG00000100997	10.4336	12.0202	0.204469	5.71147	14.0041	0.00249955	0.0194827	ABHD12	protein_coding
ENSG00000182134	2.38708	3.05334	0.356207	3.74178	14.0009	0.0025016	0.0194827	TDRKH	protein_coding
ENSG00000141542	1.65474	2.17265	0.392137	3.92303	14.0002	0.00250202	0.0194827	RAB40B	protein_coding
ENSG00000198918	240.726	274.545	0.189647	9.12247	13.9981	0.00250337	0.0194827	RPL39	protein_coding
ENSG00000262904	0.422861	0.984244	1.20956	-0.175685	13.9959	0.00250475	0.0194827	TMPOP2	processed_pseudogene
ENSG00000223482	0.552065	0.422628	-0.385452	3.53401	13.9871	0.00251034	0.0195151	NUTM2A-AS1	lncRNA
ENSG00000197380	0.982377	1.36707	0.47691	2.55402	13.9836	0.00251258	0.0195216	DACT3	protein_coding
ENSG00000196950	4.84176	3.92873	-0.301282	4.89764	13.9785	0.00251586	0.0195315	SLC39A10	protein_coding
ENSG00000253293	1.39412	1.98193	0.507845	2.75656	13.9772	0.00251668	0.0195315	HOXA10	protein_coding
ENSG00000099957	4.74137	3.71971	-0.350039	4.30848	13.9715	0.00252029	0.0195485	P2RX6	protein_coding
ENSG00000156467	21.8069	18.2931	-0.253634	7.6674	13.9604	0.00252739	0.0195831	UQCRB	protein_coding
ENSG00000143507	4.12991	3.10207	-0.411628	3.70606	13.9601	0.00252758	0.0195831	DUSP10	protein_coding
ENSG00000144712	12.7451	15.9805	0.325949	6.07826	13.9565	0.00252993	0.0195903	CAND2	protein_coding
ENSG00000084628	8.33629	6.40362	-0.380246	4.657	13.9475	0.0025357	0.019624	NKAIN1	protein_coding
ENSG00000187325	32.3114	28.5896	-0.176521	6.40698	13.942	0.00253923	0.0196403	TAF9B	protein_coding
ENSG00000198125	0.496266	0.863584	0.798526	1.06556	13.9075	0.00256158	0.0198021	MB	protein_coding
ENSG00000125351	18.631	21.3699	0.197784	6.05551	13.9023	0.00256501	0.0198175	UPF3B	protein_coding
ENSG00000171914	5.16561	4.27006	-0.274221	6.14138	13.8991	0.00256703	0.0198176	TLN2	protein_coding
ENSG00000153904	8.48466	6.40864	-0.405115	5.26172	13.8978	0.00256788	0.0198176	DDAH1	protein_coding
ENSG00000162604	3.39419	2.63525	-0.364947	4.27559	13.8627	0.00259098	0.0199846	TM2D1	protein_coding
ENSG00000160208	32.7828	29.38	-0.158019	7.46401	13.857	0.0025947	0.0199915	RRP1B	protein_coding
ENSG00000147251	6.63741	5.68467	-0.223235	5.40061	13.8569	0.00259476	0.0199915	DOCK11	protein_coding
ENSG00000023909	10.5821	9.1438	-0.21042	6.05805	13.8517	0.00259823	0.0200071	GCLM	protein_coding
ENSG00000160785	5.92321	7.11336	0.264867	5.55734	13.843	0.00260398	0.0200402	SLC25A44	protein_coding
ENSG00000103257	31.1265	37.9399	0.285279	7.15635	13.8299	0.00261267	0.0200959	SLC7A5	protein_coding
ENSG00000100626	1.22686	0.925891	-0.405616	3.54416	13.8264	0.00261502	0.0201003	GALNT16	protein_coding
ENSG00000127948	10.5843	13.4248	0.341957	6.12655	13.8238	0.00261675	0.0201003	POR	protein_coding
ENSG00000109089	3.54503	2.5299	-0.487868	3.48451	13.8189	0.00262006	0.0201003	CDR2L	protein_coding
ENSG00000187240	1.42289	1.16452	-0.288543	4.37282	13.8187	0.00262018	0.0201003	DYNC2H1	protein_coding
ENSG00000138802	8.39948	9.76785	0.217968	5.60303	13.8182	0.00262052	0.0201003	SEC24B	protein_coding
ENSG00000116761	1.43925	0.972597	-0.56386	1.7015	13.8121	0.0026246	0.0201205	CTH	protein_coding
ENSG00000154310	6.26446	7.21875	0.204762	5.95005	13.8018	0.00263152	0.0201517	TNIK	protein_coding
ENSG00000169860	7.7637	6.29426	-0.302288	5.26922	13.8017	0.00263159	0.0201517	P2RY1	protein_coding
ENSG00000083099	13.1869	11.5213	-0.194654	6.74887	13.7941	0.00263667	0.0201794	LYRM2	protein_coding
ENSG00000117360	15.2731	17.1415	0.166483	6.54769	13.7528	0.00266465	0.020369	PRPF3	protein_coding
ENSG00000006534	0.504916	0.726455	0.521945	2.08866	13.7527	0.00266471	0.020369	ALDH3B1	protein_coding
ENSG00000143772	7.84623	9.34547	0.25175	5.92126	13.7507	0.00266608	0.020369	ITPKB	protein_coding
ENSG00000166912	4.21125	3.50992	-0.262487	5.04148	13.7489	0.00266733	0.020369	MTMR10	protein_coding
ENSG00000034053	1.99004	2.52969	0.345491	3.68367	13.7355	0.00267647	0.0204275	APBA2	protein_coding
ENSG00000143512	1.96281	2.74348	0.482246	3.09214	13.73	0.00268027	0.0204452	HHIPL2	protein_coding
ENSG00000108387	0.181443	0.302175	0.734409	1.10314	13.7076	0.00269566	0.0205424	SEPTIN4	protein_coding
ENSG00000123575	8.35175	9.52626	0.189669	6.15229	13.7064	0.00269649	0.0205424	FAM199X	protein_coding
ENSG00000112357	4.94424	3.74843	-0.398163	3.21101	13.7034	0.00269856	0.0205424	PEX7	protein_coding
ENSG00000261167	1.90634	1.31244	-0.536319	2.29127	13.7026	0.00269909	0.0205424	AC107027.3	lncRNA
ENSG00000182446	20.2945	23.0265	0.182236	7.5727	13.7007	0.00270044	0.0205424	NPLOC4	protein_coding
ENSG00000154736	6.64895	5.82784	-0.190089	6.51329	13.6906	0.00270741	0.020584	ADAMTS5	protein_coding
ENSG00000130222	10.4792	14.8423	0.499863	3.75083	13.6866	0.00271025	0.0205943	GADD45G	protein_coding
ENSG00000132819	42.7763	56.2908	0.395298	6.81979	13.6717	0.00272059	0.0206533	RBM38	protein_coding
ENSG00000136816	9.44444	8.02536	-0.235056	4.98793	13.6711	0.00272099	0.0206533	TOR1B	protein_coding
ENSG00000180758	1.4453	1.86172	0.365557	3.23253	13.666	0.00272461	0.0206693	GPR157	protein_coding
ENSG00000180921	0.080954	0.202655	1.30476	-0.380963	13.6588	0.00272959	0.0206958	FAM83H	protein_coding
ENSG00000103512	19.4207	16.4979	-0.235121	6.81833	13.6565	0.00273124	0.0206969	NOMO1	protein_coding
ENSG00000162063	13.4651	15.9195	0.241439	6.38677	13.6359	0.00274576	0.0207789	CCNF	protein_coding
ENSG00000163605	36.5952	32.9732	-0.150323	7.76395	13.6358	0.00274583	0.0207789	PPP4R2	protein_coding
ENSG00000103066	5.8069	7.27	0.324192	4.7081	13.6347	0.00274656	0.0207789	PLA2G15	protein_coding
ENSG00000123144	94.4119	108.255	0.197099	6.99345	13.6294	0.0027503	0.0207957	TRIR	protein_coding
ENSG00000173848	43.6186	39.2219	-0.153225	7.62663	13.6174	0.0027588	0.0208486	NET1	protein_coding
ENSG00000223749	7.6743	10.3251	0.426765	4.36347	13.6114	0.00276308	0.0208657	MIR503HG	lncRNA
ENSG00000077279	0.952994	0.665574	-0.516781	2.90229	13.61	0.00276408	0.0208657	DCX	protein_coding
ENSG00000069275	172.239	190.325	0.144057	10.1415	13.6078	0.00276562	0.0208659	NUCKS1	protein_coding
ENSG00000261959	2.5718	1.41419	-0.857146	1.87524	13.5995	0.00277154	0.0208983	AC015909.3	lncRNA
ENSG00000168916	0.798172	1.07963	0.435725	2.61922	13.5972	0.00277318	0.0208983	ZNF608	protein_coding
ENSG00000130684	2.62398	3.35979	0.357827	3.81493	13.5955	0.00277444	0.0208983	ZNF337	protein_coding
ENSG00000132313	20.6606	17.6613	-0.226041	6.13344	13.5888	0.00277921	0.0209228	MRPL35	protein_coding
ENSG00000281398	10.4549	8.65946	-0.271347	5.36708	13.5823	0.00278388	0.0209465	SNHG4	lncRNA
ENSG00000120328	2.08166	2.71994	0.384474	3.23629	13.5769	0.00278776	0.0209644	PCDHB12	protein_coding
ENSG00000073712	13.514	11.9546	-0.1767	6.75499	13.5705	0.00279235	0.0209874	FERMT2	protein_coding
ENSG00000140612	23.4863	26.4136	0.169548	7.21124	13.5466	0.0028096	0.0211056	SEC11A	protein_coding
ENSG00000171368	0.0829742	0.198021	1.24674	-0.601831	13.525	0.00282527	0.0212118	TPPP	protein_coding
ENSG00000198900	110.882	123.96	0.160817	8.83075	13.5212	0.00282807	0.0212213	TOP1	protein_coding
ENSG00000068438	14.1906	11.5838	-0.293253	5.14459	13.509	0.00283699	0.0212767	FTSJ1	protein_coding
ENSG00000198604	20.5794	22.9997	0.160414	7.38405	13.5005	0.00284325	0.021312	BAZ1A	protein_coding
ENSG00000141905	8.45868	10.8513	0.35866	6.18534	13.4983	0.00284489	0.0213128	NFIC	protein_coding
ENSG00000160679	23.2751	20.7792	-0.16368	7.00629	13.4902	0.00285084	0.0213458	CHTOP	protein_coding
ENSG00000158525	2.04077	1.41317	-0.531555	3.15118	13.4783	0.00285964	0.0214001	CPA5	protein_coding
ENSG00000213722	22.6366	29.1124	0.362014	6.06188	13.4759	0.00286139	0.0214016	DDAH2	protein_coding
ENSG00000127152	1.07667	1.43686	0.415345	3.20349	13.4589	0.00287405	0.0214782	BCL11B	protein_coding
ENSG00000110492	446.664	398.5	-0.164626	10.044	13.4579	0.00287475	0.0214782	MDK	protein_coding
ENSG00000031698	73.3997	66.124	-0.150537	8.00316	13.4538	0.00287782	0.0214896	SARS1	protein_coding
ENSG00000203867	5.77193	4.9332	-0.226374	5.63514	13.4454	0.00288408	0.0215247	RBM20	protein_coding
ENSG00000033178	10.4122	9.26601	-0.168331	6.85535	13.4414	0.00288705	0.0215352	UBA6	protein_coding
ENSG00000149182	17.8037	20.4433	0.199743	6.66749	13.4269	0.00289791	0.0216046	ARFGAP2	protein_coding
ENSG00000168813	8.96236	7.8222	-0.196092	6.68191	13.422	0.00290166	0.0216209	ZNF507	protein_coding
ENSG00000135913	4.43444	5.21597	0.233854	5.64709	13.4185	0.00290426	0.0216244	USP37	protein_coding
ENSG00000183255	45.2252	50.5463	0.160382	7.30372	13.4144	0.00290735	0.0216244	PTTG1IP	protein_coding
ENSG00000170445	10.6917	9.33176	-0.196008	6.29968	13.4107	0.00291012	0.0216244	HARS1	protein_coding
ENSG00000095203	1.24487	0.952738	-0.385017	3.06211	13.4097	0.00291089	0.0216244	EPB41L4B	protein_coding
ENSG00000140961	2.44223	1.67695	-0.544049	3.82798	13.4096	0.00291096	0.0216244	OSGIN1	protein_coding
ENSG00000155330	3.73213	4.45511	0.255132	4.82149	13.4089	0.00291152	0.0216244	C16orf87	protein_coding
ENSG00000087903	0.837708	1.12619	0.426544	2.94562	13.402	0.00291674	0.0216438	RFX2	protein_coding
ENSG00000072756	8.20199	7.16789	-0.194519	5.58682	13.4013	0.00291726	0.0216438	TRNT1	protein_coding
ENSG00000138668	96.5342	110.179	0.190687	9.35391	13.3967	0.00292072	0.0216578	HNRNPD	protein_coding
ENSG00000143321	163.544	181.274	0.148502	9.34773	13.3945	0.0029224	0.0216586	HDGF	protein_coding
ENSG00000051382	2.48964	3.00886	0.273482	4.49533	13.3803	0.00293321	0.0217116	PIK3CB	protein_coding
ENSG00000131669	10.1229	12.6704	0.323415	5.01806	13.3801	0.00293335	0.0217116	NINJ1	protein_coding
ENSG00000072864	9.65698	11.2127	0.21579	5.6918	13.378	0.00293494	0.0217116	NDE1	protein_coding
ENSG00000175575	4.44271	3.63636	-0.288099	5.14114	13.3769	0.00293582	0.0217116	PAAF1	protein_coding
ENSG00000164494	4.01828	3.22176	-0.318559	3.93457	13.3419	0.00296262	0.021898	PDSS2	protein_coding
ENSG00000185164	4.04325	3.30087	-0.29279	4.78631	13.3376	0.00296594	0.0219006	NOMO2	protein_coding
ENSG00000225663	7.42863	9.91328	0.41515	4.65927	13.3374	0.00296613	0.0219006	MCRIP1	protein_coding
ENSG00000184517	8.75759	7.26682	-0.268597	5.0889	13.3331	0.00296943	0.0219132	ZFP1	protein_coding
ENSG00000121454	0.154049	0.277494	0.843156	0.443939	13.317	0.00298192	0.0219937	LHX4	protein_coding
ENSG00000100865	5.64289	4.68461	-0.267793	4.74722	13.3093	0.00298791	0.0220176	CINP	protein_coding
ENSG00000117632	139.766	155.011	0.149337	9.91346	13.3085	0.00298849	0.0220176	STMN1	protein_coding
ENSG00000197121	3.90067	3.38282	-0.205438	5.53576	13.3048	0.0029914	0.0220176	PGAP1	protein_coding
ENSG00000176273	1.89691	1.46322	-0.374031	3.45506	13.3028	0.00299296	0.0220176	SLC35G1	protein_coding
ENSG00000103353	29.7233	26.5693	-0.161722	7.93753	13.3026	0.00299313	0.0220176	UBFD1	protein_coding
ENSG00000174444	342.61	300.771	-0.187888	10.973	13.2993	0.00299572	0.0220249	RPL4	protein_coding
ENSG00000163349	17.6052	19.7004	0.162262	7.59468	13.2877	0.00300474	0.0220795	HIPK1	protein_coding
ENSG00000165406	2.52291	3.06807	0.282615	4.19366	13.246	0.00303762	0.0223057	MARCHF8	protein_coding
ENSG00000135931	1.74526	1.41852	-0.299198	4.08276	13.2446	0.00303875	0.0223057	ARMC9	protein_coding
ENSG00000157833	3.21039	4.10197	0.35301	4.19434	13.2391	0.0030431	0.0223258	GAREM2	protein_coding
ENSG00000106078	0.990426	0.606851	-0.703925	3.4998	13.2363	0.00304534	0.0223304	COBL	protein_coding
ENSG00000122218	33.8064	30.4296	-0.151804	7.90803	13.2287	0.00305136	0.0223487	COPA	protein_coding
ENSG00000111540	21.8906	24.8036	0.180314	7.20995	13.2285	0.00305157	0.0223487	RAB5B	protein_coding
ENSG00000102181	8.21917	9.50774	0.210209	5.44034	13.2271	0.00305269	0.0223487	CD99L2	protein_coding
ENSG00000123374	39.8407	44.2748	0.152288	7.24089	13.2245	0.00305478	0.0223495	CDK2	protein_coding
ENSG00000162607	59.246	65.9144	0.153903	7.90317	13.2212	0.00305737	0.0223495	USP1	protein_coding
ENSG00000174579	20.3266	22.8845	0.170906	6.82762	13.2209	0.00305766	0.0223495	MSL2	protein_coding
ENSG00000104218	4.09075	3.44027	-0.249281	4.87989	13.2053	0.00307011	0.0224287	CSPP1	protein_coding
ENSG00000248527	930.298	813.394	-0.193708	9.23106	13.1993	0.00307498	0.0224524	MTATP6P1	unprocessed_pseudogene
ENSG00000173041	5.015	5.84075	0.220047	5.24949	13.1925	0.00308043	0.0224803	ZNF680	protein_coding
ENSG00000067829	17.0006	14.3627	-0.242884	5.41937	13.1841	0.00308721	0.0225179	IDH3G	protein_coding
ENSG00000221968	7.29734	5.55568	-0.393957	5.90503	13.1809	0.00308984	0.0225252	FADS3	protein_coding
ENSG00000166147	3.27534	2.81403	-0.218888	5.5325	13.1781	0.0030921	0.0225298	FBN1	protein_coding
ENSG00000165288	3.95734	3.40423	-0.217083	5.68705	13.1682	0.0031001	0.0225648	BRWD3	protein_coding
ENSG00000127870	22.3441	19.6766	-0.183435	6.63244	13.1681	0.00310017	0.0225648	RNF6	protein_coding
ENSG00000164796	0.443148	0.304987	-0.538235	2.79003	13.1512	0.00311396	0.0226532	CSMD3	protein_coding
ENSG00000110841	6.15824	5.38476	-0.193544	6.00608	13.1487	0.00311604	0.0226565	PPFIBP1	protein_coding
ENSG00000055118	18.7941	23.8749	0.344532	6.55642	13.143	0.00312066	0.0226781	KCNH2	protein_coding
ENSG00000084731	1.04944	1.4042	0.419223	2.69455	13.1378	0.00312492	0.0226882	KIF3C	protein_coding
ENSG00000122126	7.98018	6.72038	-0.247445	5.34794	13.1373	0.00312537	0.0226882	OCRL	protein_coding
ENSG00000123983	39.0539	44.0779	0.17452	8.2026	13.1353	0.00312699	0.0226882	ACSL3	protein_coding
ENSG00000278768	2.63838	1.97857	-0.41415	3.41703	13.1333	0.00312861	0.0226882	BACE1-AS	lncRNA
ENSG00000038219	4.36908	3.8443	-0.184349	6.1451	13.1292	0.00313198	0.0227007	BOD1L1	protein_coding
ENSG00000168743	0.766572	0.393893	-0.959907	2.03898	13.1251	0.00313541	0.0227136	NPNT	protein_coding
ENSG00000245848	2.65343	3.62893	0.450649	2.95909	13.1114	0.0031467	0.0227835	CEBPA	protein_coding
ENSG00000054267	3.22468	2.71587	-0.24741	5.22012	13.1065	0.0031507	0.0228005	ARID4B	protein_coding
ENSG00000181467	3.47227	4.19862	0.273845	4.91494	13.0914	0.00316326	0.0228758	RAP2B	protein_coding
ENSG00000082438	0.988196	0.773283	-0.353147	3.70132	13.0891	0.00316518	0.0228758	COBLL1	protein_coding
ENSG00000013503	9.72808	8.37761	-0.215526	5.43444	13.088	0.00316607	0.0228758	POLR3B	protein_coding
ENSG00000177156	31.4802	35.4556	0.17145	6.50935	13.0852	0.00316838	0.0228806	TALDO1	protein_coding
ENSG00000164638	3.69027	5.15248	0.479593	4.50074	13.0719	0.00317952	0.0229401	SLC29A4	protein_coding
ENSG00000170004	22.6863	20.1692	-0.169601	7.85597	13.0714	0.00317995	0.0229401	CHD3	protein_coding
ENSG00000198899	5454.3	4592.51	-0.248097	11.7541	13.0635	0.00318655	0.0229757	MT-ATP6	protein_coding
ENSG00000183077	6.55703	5.14841	-0.347932	4.71079	13.0582	0.00319098	0.0229878	AFMID	protein_coding
ENSG00000197457	0.671181	1.07701	0.679191	1.29981	13.0576	0.00319155	0.0229878	STMN3	protein_coding
ENSG00000131748	4.23665	5.47307	0.368038	4.69077	13.0528	0.00319554	0.0230045	STARD3	protein_coding
ENSG00000146006	0.179227	0.0636168	-1.47543	-0.526735	13.036	0.00320976	0.0230949	LRRTM2	protein_coding
ENSG00000121281	1.4295	1.04697	-0.449595	3.23924	13.0322	0.00321293	0.0231018	ADCY7	protein_coding
ENSG00000104687	35.0692	30.7922	-0.187493	6.9617	13.0309	0.00321406	0.0231018	GSR	protein_coding
ENSG00000140406	6.56483	8.55133	0.380103	5.12244	13.0286	0.00321601	0.0231038	TLNRD1	protein_coding
ENSG00000147852	1.50918	2.07932	0.461988	3.9239	13.0253	0.00321879	0.0231117	VLDLR	protein_coding
ENSG00000197312	6.44044	5.73974	-0.166086	6.17007	13.0076	0.00323386	0.0232079	DDI2	protein_coding
ENSG00000131016	8.8305	7.39697	-0.255466	6.0732	12.9851	0.00325312	0.023334	AKAP12	protein_coding
ENSG00000203943	1.25766	0.841939	-0.57576	1.97881	12.9779	0.00325933	0.0233664	SAMD13	protein_coding
ENSG00000113719	17.9154	15.5492	-0.204135	7.83937	12.9676	0.00326825	0.0234062	ERGIC1	protein_coding
ENSG00000142102	2.35474	1.72051	-0.454007	3.3829	12.966	0.00326956	0.0234062	PGGHG	protein_coding
ENSG00000152284	14.7092	12.1351	-0.277692	5.88184	12.9656	0.00326996	0.0234062	TCF7L1	protein_coding
ENSG00000184903	2.91256	2.28724	-0.348491	3.49237	12.9624	0.00327274	0.023414	IMMP2L	protein_coding
ENSG00000088387	2.62321	2.20958	-0.246878	5.26828	12.9287	0.00330203	0.0236113	DOCK9	protein_coding
ENSG00000186834	9.98365	8.10668	-0.301374	5.20708	12.8991	0.00332798	0.0237846	HEXIM1	protein_coding
ENSG00000169251	28.3869	24.9622	-0.185479	7.06361	12.8962	0.00333059	0.0237909	NMD3	protein_coding
ENSG00000186868	0.0812161	0.140426	0.786145	0.589587	12.8898	0.00333628	0.0238192	MAPT	protein_coding
ENSG00000124785	16.0449	13.2489	-0.276514	5.18217	12.8862	0.00333943	0.0238294	NRN1	protein_coding
ENSG00000157240	4.85189	5.92347	0.287288	5.21149	12.8843	0.00334115	0.0238294	FZD1	protein_coding
ENSG00000111186	3.01022	2.3063	-0.38358	3.52831	12.8784	0.00334637	0.0238543	WNT5B	protein_coding
ENSG00000073921	29.3863	26.4854	-0.149857	7.50153	12.8625	0.00336046	0.0239424	PICALM	protein_coding
ENSG00000101639	4.68638	5.34329	0.189376	5.56732	12.849	0.00337256	0.0240163	CEP192	protein_coding
ENSG00000108219	2.78947	3.2338	0.212793	5.69234	12.8445	0.00337658	0.0240325	TSPAN14	protein_coding
ENSG00000153933	1.31721	1.03714	-0.344414	3.7059	12.8402	0.00338047	0.0240428	DGKE	protein_coding
ENSG00000166526	9.64644	11.2867	0.227151	5.89191	12.839	0.0033815	0.0240428	ZNF3	protein_coding
ENSG00000110315	3.19073	2.56797	-0.313418	4.65886	12.8338	0.00338619	0.0240539	RNF141	protein_coding
ENSG00000139921	19.3105	17.1492	-0.171409	6.55031	12.8334	0.00338654	0.0240539	TMX1	protein_coding
ENSG00000099330	0.957043	1.53551	0.681934	1.1602	12.827	0.00339236	0.0240714	OCEL1	protein_coding
ENSG00000133818	25.8575	29.4109	0.185808	6.51691	12.8267	0.00339259	0.0240714	RRAS2	protein_coding
ENSG00000168116	8.37639	10.2925	0.296764	4.81356	12.8249	0.00339424	0.0240714	KIAA1586	protein_coding
ENSG00000091640	16.2286	13.765	-0.237103	5.51189	12.8203	0.00339838	0.0240884	SPAG7	protein_coding
ENSG00000159352	63.1145	56.9832	-0.147394	7.51045	12.8164	0.00340193	0.0241012	PSMD4	protein_coding
ENSG00000274211	6.04157	6.96326	0.204961	5.78523	12.807	0.00341042	0.0241369	SOCS7	protein_coding
ENSG00000048405	2.81121	3.38261	0.26683	4.23372	12.807	0.00341046	0.0241369	ZNF800	protein_coding
ENSG00000110756	6.82398	7.7533	0.184268	5.59459	12.8015	0.00341543	0.0241597	HPS5	protein_coding
ENSG00000091136	26.5423	23.7408	-0.160899	7.70216	12.7964	0.00342014	0.0241806	LAMB1	protein_coding
ENSG00000148200	1.30037	1.71325	0.398316	3.58697	12.7903	0.00342564	0.0242072	NR6A1	protein_coding
ENSG00000067606	1.31834	1.66649	0.337481	3.51477	12.7843	0.00343114	0.0242336	PRKCZ	protein_coding
ENSG00000089060	0.476408	0.737239	0.625669	2.10136	12.7805	0.00343463	0.0242459	SLC8B1	protein_coding
ENSG00000143575	39.4776	34.3661	-0.199722	6.22019	12.7761	0.00343861	0.024255	HAX1	protein_coding
ENSG00000112031	12.9973	11.0316	-0.236118	5.71501	12.7752	0.00343943	0.024255	MTRF1L	protein_coding
ENSG00000197852	26.107	30.3654	0.218277	7.40725	12.7729	0.00344156	0.0242577	INKA2	protein_coding
ENSG00000052802	11.2895	13.6988	0.278774	5.35142	12.7633	0.00345042	0.0243077	MSMO1	protein_coding
ENSG00000120742	38.1957	33.5074	-0.188816	7.7383	12.7537	0.00345921	0.0243572	SERP1	protein_coding
ENSG00000253485	0.254402	0.423544	0.730672	0.917665	12.7518	0.00346103	0.0243576	PCDHGA5	protein_coding
ENSG00000205808	3.08187	4.14531	0.428021	3.22889	12.7404	0.00347154	0.0244192	PLPP6	protein_coding
ENSG00000257167	3.08131	3.83233	0.314918	3.47026	12.7241	0.00348672	0.0245098	TMPO-AS1	lncRNA
ENSG00000006607	3.24196	3.81188	0.233658	5.65939	12.7227	0.00348797	0.0245098	FARP2	protein_coding
ENSG00000134597	11.7435	13.9471	0.248707	5.13809	12.7138	0.0034963	0.0245558	RBMX2	protein_coding
ENSG00000169271	1.14203	2.40167	1.05776	0.15751	12.6996	0.00350956	0.0246364	HSPB3	protein_coding
ENSG00000143669	0.237823	0.343552	0.532453	2.26445	12.6955	0.00351346	0.0246513	LYST	protein_coding
ENSG00000112655	18.6689	16.5022	-0.178032	7.32236	12.6876	0.0035209	0.0246742	PTK7	protein_coding
ENSG00000205138	13.7802	17.3463	0.331421	4.05561	12.6866	0.00352186	0.0246742	SDHAF1	protein_coding
ENSG00000112308	14.8138	17.457	0.236423	5.55536	12.6863	0.00352208	0.0246742	C6orf62	protein_coding
ENSG00000168002	33.4598	38.6846	0.209722	6.02958	12.6818	0.00352637	0.024688	POLR2G	protein_coding
ENSG00000072778	18.7273	16.546	-0.178524	6.35951	12.6804	0.00352762	0.024688	ACADVL	protein_coding
ENSG00000177679	1.40889	1.94712	0.465257	3.25005	12.6785	0.0035295	0.0246886	SRRM3	protein_coding
ENSG00000171793	16.024	17.88	0.158246	7.59022	12.6678	0.00353954	0.0247464	CTPS1	protein_coding
ENSG00000102878	0.410459	0.677807	0.723503	0.753485	12.6642	0.00354297	0.0247578	HSF4	protein_coding
ENSG00000151468	45.6682	40.7005	-0.166188	7.23502	12.6472	0.00355921	0.0248587	CCDC3	protein_coding
ENSG00000142892	9.03045	7.79363	-0.212496	5.50599	12.6384	0.00356756	0.0249044	PIGK	protein_coding
ENSG00000231890	0.583408	0.366095	-0.66906	2.01983	12.633	0.00357278	0.0249283	DARS-AS1	lncRNA
ENSG00000172500	11.7712	9.64987	-0.286633	4.97872	12.6242	0.00358124	0.0249747	FIBP	protein_coding
ENSG00000150630	0.453815	0.771933	0.762954	0.610885	12.6156	0.0035895	0.0250197	VEGFC	protein_coding
ENSG00000134265	7.3072	6.30066	-0.213941	5.39547	12.6057	0.00359904	0.0250735	NAPG	protein_coding
ENSG00000101811	24.0486	21.0759	-0.190347	5.71459	12.5936	0.00361071	0.0251422	CSTF2	protein_coding
ENSG00000116574	0.547934	0.909442	0.732566	1.44633	12.587	0.00361715	0.0251744	RHOU	protein_coding
ENSG00000248636	1.01788	0.475048	-1.08888	0.605287	12.5644	0.00363923	0.0253153	AC002070.1	lncRNA
ENSG00000169891	0.801177	1.01879	0.347045	3.12772	12.5577	0.00364576	0.0253359	REPS2	protein_coding
ENSG00000173706	7.30818	8.40777	0.202186	6.65547	12.5576	0.00364586	0.0253359	HEG1	protein_coding
ENSG00000135905	1.67403	1.30808	-0.354923	3.77928	12.5497	0.00365366	0.0253773	DOCK10	protein_coding
ENSG00000178585	8.87167	10.3514	0.222747	4.98494	12.5341	0.00366903	0.0254713	CTNNBIP1	protein_coding
ENSG00000162616	11.1439	12.7757	0.196832	5.65955	12.529	0.00367406	0.0254871	DNAJB4	protein_coding
ENSG00000048740	24.8171	27.8579	0.166858	8.1754	12.528	0.003675	0.0254871	CELF2	protein_coding
ENSG00000168090	82.6156	73.1745	-0.174894	7.72143	12.5244	0.00367858	0.0254992	COPS6	protein_coding
ENSG00000112210	5.69908	4.80938	-0.244535	4.96164	12.5173	0.00368568	0.0255355	RAB23	protein_coding
ENSG00000100243	21.4068	26.8972	0.328986	6.98942	12.5149	0.00368801	0.0255389	CYB5R3	protein_coding
ENSG00000274290	0.147151	0.397849	1.42865	-0.517539	12.4943	0.0037086	0.02565	H2BC6	protein_coding
ENSG00000124120	8.84103	10.487	0.246785	6.03523	12.494	0.00370884	0.02565	TTPAL	protein_coding
ENSG00000177463	9.07595	7.90748	-0.198528	6.74675	12.4933	0.00370962	0.02565	NR2C2	protein_coding
[truncated: 11,823 more rows]
