# Supplementary material for: CircAFF1 Is a Circular RNA with a Role in Alveolar Rhabdomyosarcoma Cell Migration
Source: Biomedicines. 2023 Jul 4;11(7):1893. doi: 10.3390/biomedicines11071893 (PMC10376778; doi:10.3390/biomedicines11071893)
Supplement: Supplementary file 1 [file biomedicines-11-01893-s001.zip › Table S2.xlsx]

## Sheet: Primers
		5'-SEQUENCE-3'
Gapdh	FW	CCAAAATCAAGTGGGGCGATG
	RV	GGCAGAGATGATGACCCTTT
b-Actin	FW	CGTACCACTGGCATCGTGAT
	RV	GTAGTCAGTCAGGTCCCGGC
Ckap5	FW	GGACACAAAGGACATTTCTGCAC
	RV	TTGGTTCCAGTATTCCCTGCG
Aff1	FW	GACTATCGACAGCAGACCTTTG
	RV1	GGTTGCGTCTTTCCTTCTCTC
	RV2	CTAGGCGTATGTATTGCTGTC
Hipk3	FW	CGGCCAGTCATGTATCAAAG
	RV1	CCTGGAATACACAACTGCTTGG
	RV2	CTGATCATACTCCAAGGCTC
Vamp3	FW	ATGTGGGCAATCGGGATTAC
	RV1	GCACGGTCGTCTAACTCAGA
	RV2	GCAGGTTCTAAGTCAAAAGTC
pre-mRNA Gapdh	FW	CTGGGGGTAAGGAGATGCTG
	RV	TTACCAGAGTTAAAAGCAGCCC
Lgr5	FW	ACGCTCTGACATACATTCCC
	RV	AGAGCTTCTGTGGGTACGTG
Gnb1	FW	AAACTCTGGGATGTGCGAGA
	RV	GTCAGCACGAAGGTCAAACA
Adgrg	FW	AAGCCTCATTTTCCTCTCCC
	RV	TCTCCATCTGCAACACTTGG
Cend1	FW	GTTCGCAGCCGCCGTCATC
	RV	CACCAGAGGGGCTCAGGAC
Igf2bp3	FW	TCTGTTCCCACCCACTTCAG
	RV	CCGACTGATAGAGCTGGGAT
Nos1	FW	TCCTCCTACTCTGACTCCCA
	RV	CGCAAAAGTGAGGGTATGCT
Runx2	FW	GCAAGGTTCAACGATCTGAG
	RV	CCCGAGGTCCATCTACTGTA
S100A2	FW	AAGAGGGCGACAAGTTCAAG
	RV	CAGCATACTCCTGGAAGTCC
Slc7a11	FW	GCTGGGCTGATTTATCTTCG
	RV	AGTGATGACGAAGCCAATCC
Hmgn1	FW	AGCGGCAAGGCAGCCCAGTTT
	RV	GAGCTGACCTTCCTCTTGGG
Tlr4	FW	ATCCCCTGAGGCATTTAGGC
	RV	TGTCTGGATTTCACACCTGG
FN1	FW	TGCACGATGATATGGAGAGC
	RV	TGGGTGTGACCTGAGTGAAC
ALOX15	FW	GTCAGGTTCCCTTGTTACCG
	RV	TTCTGGAACAGGCCCTGAG
CXADR	FW	CTGTCGTAAAAAGCGCAGAGA
	RV	CGATGTAGCTTCTGGCAGTG
ITGA7	FW	CGGCTTTGGCTACTCACTG
	RV	TTGGCGCTCAAAGAAGTAGG
ITGB3	FW	TGCGAGTGTGACGACTTCTC
	RV	GTCCAGTCGGAGTCACACAG
NFASC	FW	GTGTGAAGCAAAAGGGAACC
	RV	AGACCTCCTCCTCATGGACA
NRCAM	FW	CTGAATGTCCGAGTGGTCAA
	RV	TTCAAAGACGAGGGAGCACT

## Sheet: siRNA
	Catalog number	Manufacturer	5'-SEQUENCE-3'
si-circVAMP3	Custom siRNA	Dharmacon	CAUCAUCGGUGGUGGACAUUU
si-mRNA VAMP3	Custom siRNA	Dharmacon	UGGCAGUAAUCGAAGACUUUU
si-circAFF1	Custom siRNA	Dharmacon	AGUUGAGUUUGUACAAUGAUU
si-SCR	Cat.# D-001810-10	Dharmacon	-
si-mRNA AFF1	Cat # J-020074-20-0002	Dharmacon	-
si-mRNA S100A2	Cat # J-012191-05-0002	Dharmacon	-
si-mRNA TLR4	Cat # J-008088-09-0002	Dharmacon	-
